# Supplementary material
Source: Research Square preprint supplement (doi:10.21203/rs.3.rs-8958728/v1)
Supplement: Supplementary file 1 [file 32cc9952ec6dd8f5359b774b.xlsx]

## Sheet: Sheet1
Table S2: The specific drugs referred to by each value in the Venn diagram.
sets	ECA-109	KYSE-30	KYSE-70	KYSE-140	ECA-109 KYSE-30	ECA-109 KYSE-30 KYSE-70	ECA-109 KYSE-30 KYSE-140	ECA-109 KYSE-70	ECA-109 KYSE-70 KYSE-140	ECA-109 KYSE-140	KYSE-30 KYSE-70	KYSE-30 KYSE-70 KYSE-140	KYSE-30 KYSE-140	KYSE-70 KYSE-140	ECA-109 KYSE-30 KYSE-70 KYSE-140
value	13	26	8	11	3	4	2	5	13	6	4	5	2	7	34
	Sertraline hydrochloride	Prazosin hydrochloride	Chlorhexidine hydrochloride	Acetanilide	BIBW2992 Afatinib	THONZONIUM BROMIDE	lauroseptol	SB939	Radotinib	SULOCTIDIL	ANTHRALIN	Nifuroxazide	BENZALKONIUM CHLORIDE	Antepan	4-Aminophenol
	Benzethonium chloride	salifungin	DRONEDARONE HYDROCHLORIDE	Dasatinib	Pimozide	(+)-Camptothecin	Intedanib	Belinostat	Lomitapide Mesylate	Nilotinib	Cetylpyridinium chloride monohydrate	DERMOFONGIN	Escin	Disulfiram	AP24534 Ponatinib
	Ethacridine lactate monohydrate	Capitrol	Monensin sodium salt	Everolimus	Trifluoperazine dihydrochloride	Epirubicin hydrochloride		Clotrimazole	Crizotinib	Ivermectin	Colchicine	TMTD		Hexamethylenetetramine	Neratinib(HKI-272)
	Teniposide	Tilorone dihydrochloride	PENTETIC ACID	AMLODIPINE BESYLATE		OUABAIN OCTAHYDRATE		Vorinostat	Tegaserod maleate	FENDILINE HYDROCHLORIDE	QUINACRINE DIHYDROCHLORIDE	Nitroxoline		PHENYLMERCURIC ACETATE	SANGUINARINE CHLORIDE
	Clomifene citrate	podofilox	Dabigatran etexilate	PTC124				Paclitaxel	Hydroxy Camptothecine	SUNITINIB MALATE		Flubendazole		Vinorelbine	LDK378,Ceritinib
	THIOSTREPTON	Amphotericin B	Vinblastine sulfate	Deferasirox					Tryptamine	Erlotinib				Cancidas	Carfilzomib
	AMG-073(Cinacalcet hydrochloride)	Artesunate	SPIPERONE	Primaquine diphosphate					LBH589(Panobinostat)					Oxfendazole	MLN2238
	Terconazole	BISMUTH SUBSALICYLATE	Topotecan hydrochloride	5-Aminosalicylic acid					Crystal Violet						Daunorubicin hydrochloride
	Pyrimethamine	Pimobendan		Chloquinan					Astemizole						Milbemycin oxime
	Ziprasidone HCL	QUETIAPIN		palbociclib					DIGOXIN						Penfluridol
	Methotrexate	Blonanserin		Atazanavir sulfate					LANATOSIDE C						Fingolimod Hcl
	Ebastine	Levodopa							Pixantrone dimaleate						Vortioxetine
	Sorafenib tosylate	Isavuconazole							Actidione						HYDROXYQUINOLINE
		Fluvoxamine maleate													GRAMICIDIN
		Quinestrol													BLUTENE CHLORIDE
		FLUPHENAZINE HYDROCHLORIDE													Tamoxifen citrate
		Nisoldipine													Bortezomib
		Flumethasone													Clofazimine
		Tretinoin													Thimerosal
		Pimavanserin													Amodiaquin dihydrochloride dihydrate
		Etamsylate													PROFLAVINE HEMISULFATE
		Sodium Nitroprusside													BIBW2992 DiMaleate
		Capsaicin													Adriamycin
		Febuxostat													Thioridazine hydrochloride
		Nebivolol hydrochloride													Niclosamide
		Elvitegravir(GS-9137,JTK-303)													Doxorubicin hydrochloride
															Vandetanib
															DIGITOXIGENIN
															IODOQUINOL
															Bosutinib
															Terfenadine
															DIGITOXIN
															Mitoxantrone hydrochloride
															Methylene Blue trihydrate
