# Supplementary material
Source: Research Square preprint supplement (doi:10.21203/rs.3.rs-8958728/v1)
Supplement: Supplementary file 2 [file 6c8bf3b0f41406b305fad0f1.docx]

**Supplementary Doc. S1:**

**Material and methods**

**Cell culture**

Six human ESCC cell lines (ECA-109, KYSE-30, KYSE-140, KYSE-520, KYSE-70 and KYSE-150) and two control cell lines (HEEC and OE-33) were provided by the Hefei PreceDo pharmaceuticals Co. Ltd. HEEC was cultured in Dulbecco’s Modified Eagle Medium (DMEM) supplemented with 10% fetal bovine serum (FBS, vivacell). ECA-109, KYSE-30, KYSE-140, KYSE-520, KYSE-70, KYSE-150 and OE-33 were cultured in Roswell Park Memorial Institute 1640 (RPMI 1640, biochannel) supplemented with 10% FBS. The cells were cultured at a constant temperature of 37 °C in a humidity chamber (Thermo Scientific, 160i) with 5% CO2.

[**High-Throughput Screening Assays**](https://www.ncbi.nlm.nih.gov/mesh/68057166)

To assess the susceptibility of 1600 FDA approved drugs, the ESCC cells were plated onto a drug screening plate and divided into a control group and an experimental group. All drugs were dissolved and diluted using dimethyl sulfoxide (DMSO) except platinum drugs (Oxaliplatin, cisplatin, carboplatin). The control group was treated with DMSO. The experimental concentration of all drugs is 10µM. Dosing (0.1 µL/well) was performed using a JANUS automated workstation (Perkin Elmer Inc., Wellesley, MA, USA). Monotherapy and combination therapy were administered manually. The cells were incubated for 72 h (FDA drug library screening) or 48 h (monotherapy or combination therapy) at 37 °C in a 5% CO2 incubator and CellTiter-Glo cell proliferation fluorescence detection reagent (Vazyme, DD1101-02) (10 µL) was then added to each well. After 10 min, fluorescence was measured using an EnVision plate reader (Perkin Elmer Inc., Wellesley, MA, USA) and relative luminescence units (RLU) were determined. Control cells treated with DMSO vehicle were used to calculate relative cell viability for each plate and to normalize the data on a per-plate basis. Inhibition rate was calculated as follows: inhibition rate = 100%− (RLUDrug – RLUBackground) / (RLUDMSO − RLUBackground) × 100%.

**Proteasome activity**

Proteasome activity of the β5 catalytic site was tested for the PIs using a Suc-Leu-Leu-Val-Tyr-AMC fluorescent proteasome substrate (Enzo Life Sciences, Cat. BML-P802) at a final concentration of 20 µM. KYSE-140 cells were seeded at 7000 cells/well in black 96-well flat-bottom microplates with 100 µL culture medium supplemented with 10% FBS. After 24 h, the cells were treated for 6 h with the 9 PIs at 1, 10, 100, and 1000 nM and matched untreated controls. The fluorescence intensity was measured after 2 h at 380 nm (excitation filter) and 460 nm (emission filter) in a Wallac 1420 VICTOR2™ microplate reader (Perkin Elmer).

**Pharmaceutical compounds**

1600 FDA approved compounds were purchased from Taoshu Biotechnology Co. Ltd. 9 proteasome inhibitors and 6 clinically relevant compounds were purchased from MedChemExpress (MCE) corporation. The concentration of 1600 FDA approved compounds storage solution is detailed in the **Table S1**. Stock solutions of platinum-based agents were prepared using complete medium. For monotherapy and combination treatment, DMSO was used to prepare stock solutions for proteasome inhibitors (20 mM bortezomib, carfilzomib, MLN2238; 40 mM MG-132, delanzomib, lxazomib citrate, oprozomib, PI-1840, and VR23), mitosis inhibitors (20 mM paclitaxel; 40 mM docetaxel), platinum agents (10 mM cisplatin; 20 mM oxaplatin), 5- fluorouracil (500 mM) and anlotinib (20 mM). The stock solutions were stored at -80°C. For monotherapy, a 2-, 5- and/or 10-fold dilution series containing nine working concentrations (3-768 µM cisplatin; 2-1024 µM oxaliplatin, 5-fluorouracil and anlotinib; 1-10000 nM proteasome inhibitors; 2-20000 nM mitosis inhibitors) were prepared by diluting the stock solutions with 1xPBS. Combination treatments were performed using 2-fold dilution series containing four working concentrations (1-8 µM oxaliplatin and anlotinib; 4-32 µM 5-fluorouracil; 2.5-20 nM delanzomib, oprozomib and paclitaxel; 8-64 nM lxazomib citrate; 625-5000 nM VR-23; 0.5-4 µM cisplatin; 1.25-10 nM bortezomib and carfilzomib) prepared by diluting the stock solutions in 1xPBS. Matched concentration solvent vehicle controls were used for each drug concentration. Repeated three times for the monotherapies and combination treatments. The drug(s) and corresponding controls were plated in 96-well PCR plates (VWR) and stored at -20°C. The drug plates were thawed, centrifuged (3000 rpm for 30s), and acclimatized to room temperature (RT) before the drugs were added to the cells.

**Tissue specimens from clinical and clinicopathological data collection**

Two paraffin-embedded ESCC tumor specimens (P1, P2) were collected from the Thoracic Surgery Department, The First Affiliated Hospital of Anhui Medical University, and pathologically analyzed at The First Affiliated Hospital of Anhui Medical University during 2023. One paraffin-embedded ESCC tumor specimen (P3) was collected from the Department of Oncology, The Third Affiliated Hospital of Anhui Medical University, and pathologically analyzed at The Third Affiliated Hospital of Anhui Medical University during 2024. All patients’ clinicopathological classifications were confirmed using the American Joint Committee on Cancer’s eighth edition staging standards (AJCC version 8, 2017). The samples’ clinicopathological information included age, gender, tumor site, differentiation level, tumor stage, the invasion status of nerve, vessel and outer membrane and tumor node metastasis (TNM) classifications.

**Isolation and culture of tumoral organoids**

Briefly, the patient-derived specimen was confirmed to be obtain from tissue less than 30 min and the sample was reserved in tissue storage solution (Miltenyi Biotec, Bergisch Gladbach, Germany) at 4 °C. Then, specimen was minced and performed in a shaking incubator (Shanghai Zhichu instrument Co. Ltd., ZQLY-180N) at 37 °C for 200-300 rpm with the digestion solution in a typical digestion time of 20-60 minutes. The digestion medium (#PRS-TDE-2) was purchased from Hefei PreceDo pharmaceuticals Co. Ltd. When there are no obvious tissue blocks, digestion can be stopped. After specimen digestion, the mixture was then filtered through a 70-mm nylon cell strainer (Biosharp, BS-70-XBS) and spun for 5 min at 1500 rpm. Then cell pellet was disposed by 1x RBC lysis buffer (absin, abs9101) for 5 min at 4°C in order to remove the red blood cells and then spun for 5 min at 1500rpm. The cell suspension was mixed in an equal volume of matrixgel (ABW, 082703) and then seeded in a 24-multiwell plate (Coolwind-bio, QFC03-CD0024TC) with 50 uL per well. Added 700 µL of organoid culture medium (Hefei PreceDo pharmaceuticals Co. Ltd, #PRS-ECM-3D) to each well along the wall and incubated in a 37 °C, 5% CO2 incubator after matrigel had solidified.

**Histological evaluation of tissues and organoids under H&E and IHC staining**

H&E and IHC were carried out using 5mm paraffin embedded tumor tissues or organoids. All of slides were dewaxed and hydrated. It was stained according to the standard Hematoxylin and Eosin (H&E) and immunohistochemistry (IHC) staining protocols. For IHC, primary antibodies against CK (MAIXIN, KIT-0009), CK5/6(MAIXIN, MAB-0744), P53 (MAIXIN, MAB-0674) and Ki67 (MAIXIN, MAB-0672) were used at the dilution of 1:400, primary antibodies against CK7 (MAIXIN, KIT-0021), P40 (MAIXIN, RMA-1006) were used at the dilution of 1:200. Pictures were grasped by a microscope (Leica, Weztlar, Germany) and camera. To quantify staining, five random areas per section were captured under a bright field microscope with 5x magnification, and the positive score or density of positively-stained cells was determined by two independent experienced pathologists.

**Drug sensitivity testing assay in PDOs**

Organoids were resuspended in Matrigel and embedded in suspension in a 96 well plate (1500 cells per 10mL Matrigel per well). The cells were allowed to culture for 2-5 days until the organoids significantly increased in size (approximately twice the volume of inoculated cells) before drug sensitization could be performed. Medium was replaced with fresh culture medium with varying concentrations of the drugs for another 6 days. For drugs treatments, organoids were cultured with drugs at 3-fold gradient dilution. The determination of Cmax (Maximum plasma concentration) values for anlotinib and carfilzomib was based on previous literature and DrugBank Online (https://go.drugbank.com/), respectively.24 Concentration of anlotinib were set as 9 anlotinib-Cmax, 3 anlotinib-Cmax, 1 anlotinib-Cmax, 1/3 anlotinib-Cmax, 1/9 anlotinib-Cmax, 1/27 anlotinib-Cmax, 1/81 anlotinib-Cmax, 1/243 anlotinib-Cmax (PDO#1, PDO#2 and PDO#3). Concentration of carfilzomib were set as 9 carfilzomib-Cmax, 3 carfilzomib-Cmax, 1 carfilzomib-Cmax, 1/3 carfilzomib-Cmax, 1/9 carfilzomib-Cmax, 1/27 carfilzomib-Cmax, 1/81 carfilzomib-Cmax, 1/243 carfilzomib-Cmax (PDO#1) or 1/9 carfilzomib-Cmax, 1/27 carfilzomib-Cmax, 1/81 carfilzomib-Cmax, 1/243 carfilzomib-Cmax, 1/729 carfilzomib-Cmax, 1/2187 carfilzomib-Cmax, 1/6561 carfilzomib-Cmax, 1/19683 carfilzomib-Cmax (PDO#2 and PDO#3). Assay was done in triplicate wells, and each experiment was repeated two times at least. The drugs include carfilzomib and anlotinib. At the end of treatment in each experiment, the number of viable cells was determined by CellTiter-Glo cell proliferation fluorescence detection reagent (Vazyme, DD1101-02). The combination index (CI) was calculated by CompuSyn software.

**Immunofluorescence Staining of PDO**

For immunofuorescence analysis, antigens were retrieved using EDTA antigen retrieval solution, and then blocked with 10% normal goat serum (containing 0.3% Triton X100) for 30 min at room temperature. Primary antibodies against p63 (CST 39692S, 1:200), EpCAM (CST 36746T, 1:200) and Ki67 (CST 11882S, 1:200) were incubated overnight. The slides were washed three times and incubated with corresponding secondary antibodies (goat anti-mouse secondary antibodies Alexa Fluor 568, Invitrogen, 1:1000) for 1 h at room temperature. Samples were counterstained with DAPI and then washed three times with PBS. Organoids were imaged using a fuorescence microscope (Leica, DMI8).

**Statistical analysis**

Statistical analyses were performed using a p-value cutoff of 0.05 (two-tailed) in R/Bioconductor (version 3.19) or GraphPad Prism 10.4.0 software (Prism®, San Diego, CA, USA). Dose response curve fitting was performed using GraphPad and was evaluated by measuring the area under curve (AUC). AUC and GI50 values were expressed as mean and standard deviation. Statistically significant differences were calculated using one-way ANOVA, preferring parametric analysis only if normality and lognormality tests pass (alpha = 0.05), otherwise nonparametric tests are used. No data points were excluded from the statistical analyses. Signiﬁcance was set at p < 0.05. The monotherapy data were evaluated with the IDACombo (version 1.0.2) package in R to predict potential drug combinations. SynergyFinder (version 3.2.10) package in R was used to identify synergistic drug combinations. Synergy score ≥10 was considered to have strong synergistic effects between compounds.
