# Supplementary material
Source: Research Square preprint supplement (doi:10.21203/rs.3.rs-8958728/v1)
Supplement: Supplementary file 3 [file 8e9a45dc9231dc230a51137d.xlsx]

## Sheet: KYSE-30
Table S4: The individual synergy score at each dose combination for 12 drug combinations in four cell lines (KYSE-30, KYSE-70, KYSE-140 and OE-33).
PairIndex	Drug1	Drug2	Conc1	Conc2	Relative_inhibition	Synergy	concUnit
1	Oxaliplatin	5-Fluorouracil	0	0	0	0	nM
1	Oxaliplatin	5-Fluorouracil	1000	0	21.01	0	nM
1	Oxaliplatin	5-Fluorouracil	2000	0	18.23	0	nM
1	Oxaliplatin	5-Fluorouracil	4000	0	23.87	0	nM
1	Oxaliplatin	5-Fluorouracil	8000	0	33.12	0	nM
1	Oxaliplatin	5-Fluorouracil	0	4000	8.36	0	nM
1	Oxaliplatin	5-Fluorouracil	1000	4000	4.34	-9.95942	nM
1	Oxaliplatin	5-Fluorouracil	2000	4000	6.98	-6.79051	nM
1	Oxaliplatin	5-Fluorouracil	4000	4000	26.13	2.57617	nM
1	Oxaliplatin	5-Fluorouracil	8000	4000	29.51	-4.11503	nM
1	Oxaliplatin	5-Fluorouracil	0	8000	8.58	0	nM
1	Oxaliplatin	5-Fluorouracil	1000	8000	8.12	-9.95942	nM
1	Oxaliplatin	5-Fluorouracil	2000	8000	9.97	-6.79051	nM
1	Oxaliplatin	5-Fluorouracil	4000	8000	27.07	3.64767	nM
1	Oxaliplatin	5-Fluorouracil	8000	8000	28.67	-5.07255	nM
1	Oxaliplatin	5-Fluorouracil	0	16000	29.55	0	nM
1	Oxaliplatin	5-Fluorouracil	1000	16000	26	-12.0446	nM
1	Oxaliplatin	5-Fluorouracil	2000	16000	25.45	-10.1268	nM
1	Oxaliplatin	5-Fluorouracil	4000	16000	26.55	-14.0358	nM
1	Oxaliplatin	5-Fluorouracil	8000	16000	30.29	-18.24	nM
1	Oxaliplatin	5-Fluorouracil	0	32000	34.12	0	nM
1	Oxaliplatin	5-Fluorouracil	1000	32000	30.86	-11.1952	nM
1	Oxaliplatin	5-Fluorouracil	2000	32000	29.38	-10.5026	nM
1	Oxaliplatin	5-Fluorouracil	4000	32000	31.32	-13.1191	nM
1	Oxaliplatin	5-Fluorouracil	8000	32000	30.09	-22.4394	nM
2	Oxaliplatin	Delanzomib	0	0	0	0	nM
2	Oxaliplatin	Delanzomib	1000	0	10.41	0	nM
2	Oxaliplatin	Delanzomib	2000	0	10.18	0	nM
2	Oxaliplatin	Delanzomib	4000	0	24.2	0	nM
2	Oxaliplatin	Delanzomib	8000	0	31.9	0	nM
2	Oxaliplatin	Delanzomib	0	2.5	10.7	0	nM
2	Oxaliplatin	Delanzomib	1000	2.5	6.24	-2.31815	nM
2	Oxaliplatin	Delanzomib	2000	2.5	3.82	-2.06737	nM
2	Oxaliplatin	Delanzomib	4000	2.5	6.85	-17.3537	nM
2	Oxaliplatin	Delanzomib	8000	2.5	33.06	0.284	nM
2	Oxaliplatin	Delanzomib	0	5	11.41	0	nM
2	Oxaliplatin	Delanzomib	1000	5	2.8	-3.09479	nM
2	Oxaliplatin	Delanzomib	2000	5	0.84	-2.84601	nM
2	Oxaliplatin	Delanzomib	4000	5	-2.46	-18.0108	nM
2	Oxaliplatin	Delanzomib	8000	5	31.56	-1.96381	nM
2	Oxaliplatin	Delanzomib	0	10	35.12	0	nM
2	Oxaliplatin	Delanzomib	1000	10	34.41	-1.50539	nM
2	Oxaliplatin	Delanzomib	2000	10	35.7	0.102218	nM
2	Oxaliplatin	Delanzomib	4000	10	32.71	-14.3078	nM
2	Oxaliplatin	Delanzomib	8000	10	34.29	-18.6615	nM
2	Oxaliplatin	Delanzomib	0	20	45.63	0	nM
2	Oxaliplatin	Delanzomib	1000	20	45.42	-0.836134	nM
2	Oxaliplatin	Delanzomib	2000	20	48.28	2.47677	nM
2	Oxaliplatin	Delanzomib	4000	20	45.44	-9.96836	nM
2	Oxaliplatin	Delanzomib	8000	20	50.37	-9.6324	nM
3	Oxaliplatin	Ixazomib citrate	0	0	0	0	nM
3	Oxaliplatin	Ixazomib citrate	1000	0	16.12	0	nM
3	Oxaliplatin	Ixazomib citrate	2000	0	16.91	0	nM
3	Oxaliplatin	Ixazomib citrate	4000	0	24.18	0	nM
3	Oxaliplatin	Ixazomib citrate	8000	0	33.27	0	nM
3	Oxaliplatin	Ixazomib citrate	0	8	16.75	0	nM
3	Oxaliplatin	Ixazomib citrate	1000	8	8.62	-5.16622	nM
3	Oxaliplatin	Ixazomib citrate	2000	8	12.02	-6.05938	nM
3	Oxaliplatin	Ixazomib citrate	4000	8	24.74	-1.98377	nM
3	Oxaliplatin	Ixazomib citrate	8000	8	34.49	-0.898564	nM
3	Oxaliplatin	Ixazomib citrate	0	16	24.57	0	nM
3	Oxaliplatin	Ixazomib citrate	1000	16	24.42	-2.15226	nM
3	Oxaliplatin	Ixazomib citrate	2000	16	24.31	-3.08971	nM
3	Oxaliplatin	Ixazomib citrate	4000	16	29.34	-4.67525	nM
3	Oxaliplatin	Ixazomib citrate	8000	16	37.61	-4.34941	nM
3	Oxaliplatin	Ixazomib citrate	0	32	40.25	0	nM
3	Oxaliplatin	Ixazomib citrate	1000	32	41.23	-0.424336	nM
3	Oxaliplatin	Ixazomib citrate	2000	32	39.1	-3.54759	nM
3	Oxaliplatin	Ixazomib citrate	4000	32	42.31	-5.70598	nM
3	Oxaliplatin	Ixazomib citrate	8000	32	43.76	-11.3922	nM
3	Oxaliplatin	Ixazomib citrate	0	64	73.17	0	nM
3	Oxaliplatin	Ixazomib citrate	1000	64	68.85	-5.73772	nM
3	Oxaliplatin	Ixazomib citrate	2000	64	70.77	-3.78808	nM
3	Oxaliplatin	Ixazomib citrate	4000	64	71.2	-5.93594	nM
3	Oxaliplatin	Ixazomib citrate	8000	64	77.56	-1.83636	nM
4	Oxaliplatin	VR-23	0	0	0	0	nM
4	Oxaliplatin	VR-23	1000	0	16.62	0	nM
4	Oxaliplatin	VR-23	2000	0	14.95	0	nM
4	Oxaliplatin	VR-23	4000	0	24.36	0	nM
4	Oxaliplatin	VR-23	8000	0	32.93	0	nM
4	Oxaliplatin	VR-23	0	625	4.43	0	nM
4	Oxaliplatin	VR-23	1000	625	10.84	-6.40245	nM
4	Oxaliplatin	VR-23	2000	625	11.35	-3.98768	nM
4	Oxaliplatin	VR-23	4000	625	14.85	-10.5341	nM
4	Oxaliplatin	VR-23	8000	625	26.44	-7.18891	nM
4	Oxaliplatin	VR-23	0	1250	17.42	0	nM
4	Oxaliplatin	VR-23	1000	1250	12.32	-12.6385	nM
4	Oxaliplatin	VR-23	2000	1250	10.39	-13.0842	nM
4	Oxaliplatin	VR-23	4000	1250	13.55	-19.1185	nM
4	Oxaliplatin	VR-23	8000	1250	23.77	-16.4814	nM
4	Oxaliplatin	VR-23	0	2500	26.52	0	nM
4	Oxaliplatin	VR-23	1000	2500	22.54	-10.6277	nM
4	Oxaliplatin	VR-23	2000	2500	24.35	-7.11714	nM
4	Oxaliplatin	VR-23	4000	2500	22.49	-17.6613	nM
4	Oxaliplatin	VR-23	8000	2500	23.34	-24.4464	nM
4	Oxaliplatin	VR-23	0	5000	49.81	0	nM
4	Oxaliplatin	VR-23	1000	5000	46.28	-8.15805	nM
4	Oxaliplatin	VR-23	2000	5000	48.05	-5.16902	nM
4	Oxaliplatin	VR-23	4000	5000	53.58	-4.83836	nM
4	Oxaliplatin	VR-23	8000	5000	53.46	-10.2489	nM
5	Oxaliplatin	Oprozomib	0	0	0	0	nM
5	Oxaliplatin	Oprozomib	1000	0	14.05	0	nM
5	Oxaliplatin	Oprozomib	2000	0	12.48	0	nM
5	Oxaliplatin	Oprozomib	4000	0	23.82	0	nM
5	Oxaliplatin	Oprozomib	8000	0	36.07	0	nM
5	Oxaliplatin	Oprozomib	0	2.5	11.79	0	nM
5	Oxaliplatin	Oprozomib	1000	2.5	4.46	-2.27997	nM
5	Oxaliplatin	Oprozomib	2000	2.5	6.04	-0.494975	nM
5	Oxaliplatin	Oprozomib	4000	2.5	27.27	3.92244	nM
5	Oxaliplatin	Oprozomib	8000	2.5	38.46	2.71729	nM
5	Oxaliplatin	Oprozomib	0	5	25.19	0	nM
5	Oxaliplatin	Oprozomib	1000	5	21.57	-6.05494	nM
5	Oxaliplatin	Oprozomib	2000	5	21.19	-4.96876	nM
5	Oxaliplatin	Oprozomib	4000	5	23.42	-13.3994	nM
5	Oxaliplatin	Oprozomib	8000	5	33.14	-14.1943	nM
5	Oxaliplatin	Oprozomib	0	10	30.48	0	nM
5	Oxaliplatin	Oprozomib	1000	10	21.53	-11.9777	nM
5	Oxaliplatin	Oprozomib	2000	10	26.56	-4.84804	nM
5	Oxaliplatin	Oprozomib	4000	10	29.01	-12.2531	nM
5	Oxaliplatin	Oprozomib	8000	10	40.21	-10.5277	nM
5	Oxaliplatin	Oprozomib	0	20	58.42	0	nM
5	Oxaliplatin	Oprozomib	1000	20	51.61	-8.8204	nM
5	Oxaliplatin	Oprozomib	2000	20	50.93	-8.74968	nM
5	Oxaliplatin	Oprozomib	4000	20	55.18	-10.0127	nM
5	Oxaliplatin	Oprozomib	8000	20	55.51	-16.2216	nM
6	5-Fluorouracil	VR-23	0	0	0	0	nM
6	5-Fluorouracil	VR-23	4000	0	10.33	0	nM
6	5-Fluorouracil	VR-23	8000	0	17.08	0	nM
6	5-Fluorouracil	VR-23	16000	0	27.84	0	nM
6	5-Fluorouracil	VR-23	32000	0	28.98	0	nM
6	5-Fluorouracil	VR-23	0	625	14.3	0	nM
6	5-Fluorouracil	VR-23	4000	625	8.02	-3.746	nM
6	5-Fluorouracil	VR-23	8000	625	12.07	-9.11569	nM
6	5-Fluorouracil	VR-23	16000	625	39.34	9.88023	nM
6	5-Fluorouracil	VR-23	32000	625	45.51	15.5776	nM
6	5-Fluorouracil	VR-23	0	1250	17.02	0	nM
6	5-Fluorouracil	VR-23	4000	1250	5.51	-6.80097	nM
6	5-Fluorouracil	VR-23	8000	1250	15.89	-7.6704	nM
6	5-Fluorouracil	VR-23	16000	1250	36.57	4.29315	nM
6	5-Fluorouracil	VR-23	32000	1250	38.96	5.78417	nM
6	5-Fluorouracil	VR-23	0	2500	27.99	0	nM
6	5-Fluorouracil	VR-23	4000	2500	28.92	1.04453	nM
6	5-Fluorouracil	VR-23	8000	2500	31.52	-1.59027	nM
6	5-Fluorouracil	VR-23	16000	2500	37.01	-5.19837	nM
6	5-Fluorouracil	VR-23	32000	2500	42.08	-0.539555	nM
6	5-Fluorouracil	VR-23	0	5000	41.34	0	nM
6	5-Fluorouracil	VR-23	4000	5000	44.26	3.2796	nM
6	5-Fluorouracil	VR-23	8000	5000	44.18	-1.3354	nM
6	5-Fluorouracil	VR-23	16000	5000	44.3	-9.16277	nM
6	5-Fluorouracil	VR-23	32000	5000	50.82	-2.6834	nM
7	5-Fluorouracil	Oprozomib	0	0	0	0	nM
7	5-Fluorouracil	Oprozomib	4000	0	24.38	0	nM
7	5-Fluorouracil	Oprozomib	8000	0	25.1	0	nM
7	5-Fluorouracil	Oprozomib	16000	0	27.56	0	nM
7	5-Fluorouracil	Oprozomib	32000	0	33.47	0	nM
7	5-Fluorouracil	Oprozomib	0	2.5	4.51	0	nM
7	5-Fluorouracil	Oprozomib	4000	2.5	14.11	-11.8792	nM
7	5-Fluorouracil	Oprozomib	8000	2.5	19.36	-6.6394	nM
7	5-Fluorouracil	Oprozomib	16000	2.5	26.73	-0.960053	nM
7	5-Fluorouracil	Oprozomib	32000	2.5	33.86	0.451109	nM
7	5-Fluorouracil	Oprozomib	0	5	21.22	0	nM
7	5-Fluorouracil	Oprozomib	4000	5	13.34	-20.2948	nM
7	5-Fluorouracil	Oprozomib	8000	5	17.81	-16.122	nM
7	5-Fluorouracil	Oprozomib	16000	5	19.75	-16.471	nM
7	5-Fluorouracil	Oprozomib	32000	5	27.28	-13.9904	nM
7	5-Fluorouracil	Oprozomib	0	10	25.53	0	nM
7	5-Fluorouracil	Oprozomib	4000	10	26.95	-9.15161	nM
7	5-Fluorouracil	Oprozomib	8000	10	28.15	-8.48096	nM
7	5-Fluorouracil	Oprozomib	16000	10	25.16	-14.3905	nM
7	5-Fluorouracil	Oprozomib	32000	10	29.11	-15.7101	nM
7	5-Fluorouracil	Oprozomib	0	20	51.7	0	nM
7	5-Fluorouracil	Oprozomib	4000	20	53.99	-4.35206	nM
7	5-Fluorouracil	Oprozomib	8000	20	51.26	-7.9751	nM
7	5-Fluorouracil	Oprozomib	16000	20	54.95	-5.29662	nM
7	5-Fluorouracil	Oprozomib	32000	20	62.14	-0.799184	nM
8	Cisplatin	Delanzomib	0	0	0	0	nM
8	Cisplatin	Delanzomib	500	0	12.33	0	nM
8	Cisplatin	Delanzomib	1000	0	15.76	0	nM
8	Cisplatin	Delanzomib	2000	0	21.29	0	nM
8	Cisplatin	Delanzomib	4000	0	49.92	0	nM
8	Cisplatin	Delanzomib	0	2.5	6.6	0	nM
8	Cisplatin	Delanzomib	500	2.5	-0.1	-3.82047	nM
8	Cisplatin	Delanzomib	1000	2.5	-0.72	-7.5834	nM
8	Cisplatin	Delanzomib	2000	2.5	32.65	12.4626	nM
8	Cisplatin	Delanzomib	4000	2.5	54.31	4.81611	nM
8	Cisplatin	Delanzomib	0	5	6.08	0	nM
8	Cisplatin	Delanzomib	500	5	-1.87	-3.82047	nM
8	Cisplatin	Delanzomib	1000	5	-4.7	-7.5834	nM
8	Cisplatin	Delanzomib	2000	5	33.72	13.6365	nM
8	Cisplatin	Delanzomib	4000	5	49.63	-0.318148	nM
8	Cisplatin	Delanzomib	0	10	27.47	0	nM
8	Cisplatin	Delanzomib	500	10	26.43	-4.1809	nM
8	Cisplatin	Delanzomib	1000	10	29.15	-4.19104	nM
8	Cisplatin	Delanzomib	2000	10	33.3	-4.46555	nM
8	Cisplatin	Delanzomib	4000	10	49.42	-11.773	nM
8	Cisplatin	Delanzomib	0	20	34.75	0	nM
8	Cisplatin	Delanzomib	500	20	33.05	-4.59983	nM
8	Cisplatin	Delanzomib	1000	20	35.8	-4.27654	nM
8	Cisplatin	Delanzomib	2000	20	38.13	-6.06317	nM
8	Cisplatin	Delanzomib	4000	20	46.75	-19.09	nM
9	Cisplatin	Paclitaxel	0	0	0	0	nM
9	Cisplatin	Paclitaxel	500	0	8.53	0	nM
9	Cisplatin	Paclitaxel	1000	0	8.6	0	nM
9	Cisplatin	Paclitaxel	2000	0	24.31	0	nM
9	Cisplatin	Paclitaxel	4000	0	52	0	nM
9	Cisplatin	Paclitaxel	0	2.5	39.57	0	nM
9	Cisplatin	Paclitaxel	500	2.5	40.96	1.7243	nM
9	Cisplatin	Paclitaxel	1000	2.5	41.48	2.36936	nM
9	Cisplatin	Paclitaxel	2000	2.5	47.44	5.18517	nM
9	Cisplatin	Paclitaxel	4000	2.5	59.5	-5.60398	nM
9	Cisplatin	Paclitaxel	0	5	59.91	0	nM
9	Cisplatin	Paclitaxel	500	5	56.78	-3.88277	nM
9	Cisplatin	Paclitaxel	1000	5	55.68	-5.24732	nM
9	Cisplatin	Paclitaxel	2000	5	53.25	-11.2986	nM
9	Cisplatin	Paclitaxel	4000	5	60.24	-19.7101	nM
9	Cisplatin	Paclitaxel	0	10	54.85	0	nM
9	Cisplatin	Paclitaxel	500	10	50.33	-5.60707	nM
9	Cisplatin	Paclitaxel	1000	10	49.27	-6.922	nM
9	Cisplatin	Paclitaxel	2000	10	50.88	-8.34491	nM
9	Cisplatin	Paclitaxel	4000	10	57.26	-19.6692	nM
9	Cisplatin	Paclitaxel	0	20	60.96	0	nM
9	Cisplatin	Paclitaxel	500	20	53.85	-8.81997	nM
9	Cisplatin	Paclitaxel	1000	20	54.11	-8.49744	nM
9	Cisplatin	Paclitaxel	2000	20	54.76	-10.6484	nM
9	Cisplatin	Paclitaxel	4000	20	59.39	-21.5401	nM
10	Cisplatin	5-Fluorouracil	0	0	0	0	nM
10	Cisplatin	5-Fluorouracil	500	0	17.45	0	nM
10	Cisplatin	5-Fluorouracil	1000	0	14.36	0	nM
10	Cisplatin	5-Fluorouracil	2000	0	21.04	0	nM
10	Cisplatin	5-Fluorouracil	4000	0	47.22	0	nM
10	Cisplatin	5-Fluorouracil	0	4000	9.52	0	nM
10	Cisplatin	5-Fluorouracil	500	4000	5.97	-6.95588	nM
10	Cisplatin	5-Fluorouracil	1000	4000	6.74	-3.47306	nM
10	Cisplatin	5-Fluorouracil	2000	4000	25.63	5.1735	nM
10	Cisplatin	5-Fluorouracil	4000	4000	43.34	-4.37324	nM
10	Cisplatin	5-Fluorouracil	0	8000	12.58	0	nM
10	Cisplatin	5-Fluorouracil	500	8000	10.94	-8.32063	nM
10	Cisplatin	5-Fluorouracil	1000	8000	6.73	-4.8889	nM
10	Cisplatin	5-Fluorouracil	2000	8000	23.69	1.68148	nM
10	Cisplatin	5-Fluorouracil	4000	8000	44.17	-4.31031	nM
10	Cisplatin	5-Fluorouracil	0	16000	28.26	0	nM
10	Cisplatin	5-Fluorouracil	500	16000	21.58	-13.1537	nM
10	Cisplatin	5-Fluorouracil	1000	16000	25.21	-6.24604	nM
10	Cisplatin	5-Fluorouracil	2000	16000	29.4	-7.61149	nM
10	Cisplatin	5-Fluorouracil	4000	16000	46.73	-11.9387	nM
10	Cisplatin	5-Fluorouracil	0	32000	35.24	0	nM
10	Cisplatin	5-Fluorouracil	500	32000	34.19	-6.26075	nM
10	Cisplatin	5-Fluorouracil	1000	32000	35.02	-2.78304	nM
10	Cisplatin	5-Fluorouracil	2000	32000	36.42	-6.70082	nM
10	Cisplatin	5-Fluorouracil	4000	32000	52.37	-10.2619	nM
11	Anlotinib	Bortezomibl	0	0	0	0	nM
11	Anlotinib	Bortezomibl	1000	0	18.08	0	nM
11	Anlotinib	Bortezomibl	2000	0	18.02	0	nM
11	Anlotinib	Bortezomibl	4000	0	38.6	0	nM
11	Anlotinib	Bortezomibl	8000	0	64.21	0	nM
11	Anlotinib	Bortezomibl	0	1.25	12.48	0	nM
11	Anlotinib	Bortezomibl	1000	1.25	16.48	-1.84708	nM
11	Anlotinib	Bortezomibl	2000	1.25	19.81	2.06642	nM
11	Anlotinib	Bortezomibl	4000	1.25	37.56	-1.2006	nM
11	Anlotinib	Bortezomibl	8000	1.25	64.42	0.242429	nM
11	Anlotinib	Bortezomibl	0	2.5	20.55	0	nM
11	Anlotinib	Bortezomibl	1000	2.5	16.34	-9.84006	nM
11	Anlotinib	Bortezomibl	2000	2.5	17.9	-7.97562	nM
11	Anlotinib	Bortezomibl	4000	2.5	36.9	-7.83222	nM
11	Anlotinib	Bortezomibl	8000	2.5	60.75	-7.41575	nM
11	Anlotinib	Bortezomibl	0	5	30.99	0	nM
11	Anlotinib	Bortezomibl	1000	5	19.86	-17.1743	nM
11	Anlotinib	Bortezomibl	2000	5	26.15	-9.85778	nM
11	Anlotinib	Bortezomibl	4000	5	38.56	-14.4587	nM
11	Anlotinib	Bortezomibl	8000	5	64.34	-8.25095	nM
11	Anlotinib	Bortezomibl	0	10	45.83	0	nM
11	Anlotinib	Bortezomibl	1000	10	41.54	-8.34786	nM
11	Anlotinib	Bortezomibl	2000	10	39.42	-10.7519	nM
11	Anlotinib	Bortezomibl	4000	10	52.95	-9.9897	nM
11	Anlotinib	Bortezomibl	8000	10	74.5	-3.60026	nM
12	Anlotinib	Carfilzomib	0	0	0	0	nM
12	Anlotinib	Carfilzomib	1000	0	15.89	0	nM
12	Anlotinib	Carfilzomib	2000	0	13.48	0	nM
12	Anlotinib	Carfilzomib	4000	0	22.83	0	nM
12	Anlotinib	Carfilzomib	8000	0	52.95	0	nM
12	Anlotinib	Carfilzomib	0	1.25	21.86	0	nM
12	Anlotinib	Carfilzomib	1000	1.25	18.73	-4.18346	nM
12	Anlotinib	Carfilzomib	2000	1.25	17.61	-5.02658	nM
12	Anlotinib	Carfilzomib	4000	1.25	42.16	15.942	nM
12	Anlotinib	Carfilzomib	8000	1.25	69.13	14.9174	nM
12	Anlotinib	Carfilzomib	0	2.5	32.71	0	nM
12	Anlotinib	Carfilzomib	1000	2.5	79.67	55.1261	nM
12	Anlotinib	Carfilzomib	2000	2.5	32.48	-0.272027	nM
12	Anlotinib	Carfilzomib	4000	2.5	53.38	17.4998	nM
12	Anlotinib	Carfilzomib	8000	2.5	76.33	16.292	nM
12	Anlotinib	Carfilzomib	0	5	63.27	0	nM
12	Anlotinib	Carfilzomib	1000	5	81.04	20.7907	nM
12	Anlotinib	Carfilzomib	2000	5	64.83	1.84505	nM
12	Anlotinib	Carfilzomib	4000	5	82.44	18.8808	nM
12	Anlotinib	Carfilzomib	8000	5	87.72	9.6501	nM
12	Anlotinib	Carfilzomib	0	10	85.32	0	nM
12	Anlotinib	Carfilzomib	1000	10	76.47	-10.5576	nM
12	Anlotinib	Carfilzomib	2000	10	85.4	0.094618	nM
12	Anlotinib	Carfilzomib	4000	10	89.88	3.87764	nM
12	Anlotinib	Carfilzomib	8000	10	93.56	2.04494	nM
Abbreviations: conc, concentration.

## Sheet: KYSE-70
Table S4: The individual synergy score at each dose combination for 12 drug combinations in four cell lines (KYSE-30, KYSE-70, KYSE-140 and OE-33).
PairIndex	Drug1	Drug2	Conc1	Conc2	Relative_inhibition	Synergy	concUnit
1	Oxaliplatin	5-Fluorouracil	0	0	0	0	nM
1	Oxaliplatin	5-Fluorouracil	1000	0	11.73	0	nM
1	Oxaliplatin	5-Fluorouracil	2000	0	16.19	0	nM
1	Oxaliplatin	5-Fluorouracil	4000	0	26.46	0	nM
1	Oxaliplatin	5-Fluorouracil	8000	0	43.38	0	nM
1	Oxaliplatin	5-Fluorouracil	0	4000	37.09	0	nM
1	Oxaliplatin	5-Fluorouracil	1000	4000	25.48	-14.4441	nM
1	Oxaliplatin	5-Fluorouracil	2000	4000	29.12	-9.91555	nM
1	Oxaliplatin	5-Fluorouracil	4000	4000	35.33	-8.84873	nM
1	Oxaliplatin	5-Fluorouracil	8000	4000	40.15	-19.3276	nM
1	Oxaliplatin	5-Fluorouracil	0	8000	41.8	0	nM
1	Oxaliplatin	5-Fluorouracil	1000	8000	31.99	-12.2047	nM
1	Oxaliplatin	5-Fluorouracil	2000	8000	35.76	-7.51442	nM
1	Oxaliplatin	5-Fluorouracil	4000	8000	31.96	-18.4026	nM
1	Oxaliplatin	5-Fluorouracil	8000	8000	41.57	-21.6886	nM
1	Oxaliplatin	5-Fluorouracil	0	16000	56.58	0	nM
1	Oxaliplatin	5-Fluorouracil	1000	16000	55.31	-1.58002	nM
1	Oxaliplatin	5-Fluorouracil	2000	16000	53.65	-3.64524	nM
1	Oxaliplatin	5-Fluorouracil	4000	16000	55.37	-6.10143	nM
1	Oxaliplatin	5-Fluorouracil	8000	16000	55.51	-17.2985	nM
1	Oxaliplatin	5-Fluorouracil	0	32000	67.27	0	nM
1	Oxaliplatin	5-Fluorouracil	1000	32000	58.62	-10.7615	nM
1	Oxaliplatin	5-Fluorouracil	2000	32000	60.12	-8.89538	nM
1	Oxaliplatin	5-Fluorouracil	4000	32000	58.91	-13.8653	nM
1	Oxaliplatin	5-Fluorouracil	8000	32000	58.05	-23.5068	nM
2	Oxaliplatin	Delanzomib	0	0	0	0	nM
2	Oxaliplatin	Delanzomib	1000	0	14.35	0	nM
2	Oxaliplatin	Delanzomib	2000	0	17.98	0	nM
2	Oxaliplatin	Delanzomib	4000	0	26.29	0	nM
2	Oxaliplatin	Delanzomib	8000	0	36.45	0	nM
2	Oxaliplatin	Delanzomib	0	2.5	3.71	0	nM
2	Oxaliplatin	Delanzomib	1000	2.5	4.11	-5.96891	nM
2	Oxaliplatin	Delanzomib	2000	2.5	14.75	-3.54606	nM
2	Oxaliplatin	Delanzomib	4000	2.5	26.03	-0.285442	nM
2	Oxaliplatin	Delanzomib	8000	2.5	37.99	1.69069	nM
2	Oxaliplatin	Delanzomib	0	5	8.13	0	nM
2	Oxaliplatin	Delanzomib	1000	5	1.86	-5.96891	nM
2	Oxaliplatin	Delanzomib	2000	5	8.49	-9.95411	nM
2	Oxaliplatin	Delanzomib	4000	5	17.04	-10.1551	nM
2	Oxaliplatin	Delanzomib	8000	5	33.61	-3.1179	nM
2	Oxaliplatin	Delanzomib	0	10	6.52	0	nM
2	Oxaliplatin	Delanzomib	1000	10	1.43	-5.96891	nM
2	Oxaliplatin	Delanzomib	2000	10	16.78	-1.31742	nM
2	Oxaliplatin	Delanzomib	4000	10	20.26	-6.62005	nM
2	Oxaliplatin	Delanzomib	8000	10	35.27	-1.29547	nM
2	Oxaliplatin	Delanzomib	0	20	13.43	0	nM
2	Oxaliplatin	Delanzomib	1000	20	2.57	-10.6318	nM
2	Oxaliplatin	Delanzomib	2000	20	12.69	-10.2729	nM
2	Oxaliplatin	Delanzomib	4000	20	21.15	-9.65583	nM
2	Oxaliplatin	Delanzomib	8000	20	37.96	-1.80198	nM
3	Oxaliplatin	Ixazomib citrate	0	0	0	0	nM
3	Oxaliplatin	Ixazomib citrate	1000	0	16.01	0	nM
3	Oxaliplatin	Ixazomib citrate	2000	0	18.61	0	nM
3	Oxaliplatin	Ixazomib citrate	4000	0	27.79	0	nM
3	Oxaliplatin	Ixazomib citrate	8000	0	32.3	0	nM
3	Oxaliplatin	Ixazomib citrate	0	8	7.93	0	nM
3	Oxaliplatin	Ixazomib citrate	1000	8	7.02	-6.3323	nM
3	Oxaliplatin	Ixazomib citrate	2000	8	11.74	-7.66159	nM
3	Oxaliplatin	Ixazomib citrate	4000	8	27.27	-0.579917	nM
3	Oxaliplatin	Ixazomib citrate	8000	8	33.97	1.86242	nM
3	Oxaliplatin	Ixazomib citrate	0	16	6.14	0	nM
3	Oxaliplatin	Ixazomib citrate	1000	16	0.73	-6.3323	nM
3	Oxaliplatin	Ixazomib citrate	2000	16	12.91	-6.35678	nM
3	Oxaliplatin	Ixazomib citrate	4000	16	21.08	-7.48316	nM
3	Oxaliplatin	Ixazomib citrate	8000	16	27.43	-5.43114	nM
3	Oxaliplatin	Ixazomib citrate	0	32	9.34	0	nM
3	Oxaliplatin	Ixazomib citrate	1000	32	4.58	-6.3323	nM
3	Oxaliplatin	Ixazomib citrate	2000	32	12.92	-6.34563	nM
3	Oxaliplatin	Ixazomib citrate	4000	32	19.54	-9.2006	nM
3	Oxaliplatin	Ixazomib citrate	8000	32	28.55	-4.18209	nM
3	Oxaliplatin	Ixazomib citrate	0	64	31.63	0	nM
3	Oxaliplatin	Ixazomib citrate	1000	64	29.66	-7.02524	nM
3	Oxaliplatin	Ixazomib citrate	2000	64	31.44	-7.25101	nM
3	Oxaliplatin	Ixazomib citrate	4000	64	34.31	-11.8564	nM
3	Oxaliplatin	Ixazomib citrate	8000	64	38.5	-11.0186	nM
4	Oxaliplatin	VR-23	0	0	0	0	nM
4	Oxaliplatin	VR-23	1000	0	13.02	0	nM
4	Oxaliplatin	VR-23	2000	0	18.55	0	nM
4	Oxaliplatin	VR-23	4000	0	25.64	0	nM
4	Oxaliplatin	VR-23	8000	0	32.48	0	nM
4	Oxaliplatin	VR-23	0	625	4.9	0	nM
4	Oxaliplatin	VR-23	1000	625	1.05	-5.79639	nM
4	Oxaliplatin	VR-23	2000	625	10.59	-8.62107	nM
4	Oxaliplatin	VR-23	4000	625	23.98	-1.79786	nM
4	Oxaliplatin	VR-23	8000	625	32.43	-0.0541525	nM
4	Oxaliplatin	VR-23	0	1250	2.28	0	nM
4	Oxaliplatin	VR-23	1000	1250	-2.43	-5.79639	nM
4	Oxaliplatin	VR-23	2000	1250	6.68	-11.7856	nM
4	Oxaliplatin	VR-23	4000	1250	13.73	-12.8991	nM
4	Oxaliplatin	VR-23	8000	1250	22.3	-11.0254	nM
4	Oxaliplatin	VR-23	0	2500	9.51	0	nM
4	Oxaliplatin	VR-23	1000	2500	-4.83	-7.67564	nM
4	Oxaliplatin	VR-23	2000	2500	11.32	-9.59022	nM
4	Oxaliplatin	VR-23	4000	2500	21.65	-5.92796	nM
4	Oxaliplatin	VR-23	8000	2500	26.34	-8.10873	nM
4	Oxaliplatin	VR-23	0	5000	73.48	0	nM
4	Oxaliplatin	VR-23	1000	5000	73.33	-1.82732	nM
4	Oxaliplatin	VR-23	2000	5000	75.67	-1.01325	nM
4	Oxaliplatin	VR-23	4000	5000	74.99	-3.95527	nM
4	Oxaliplatin	VR-23	8000	5000	72.28	-9.01811	nM
5	Oxaliplatin	Oprozomib	0	0	0	0	nM
5	Oxaliplatin	Oprozomib	1000	0	12.37	0	nM
5	Oxaliplatin	Oprozomib	2000	0	18.78	0	nM
5	Oxaliplatin	Oprozomib	4000	0	26.23	0	nM
5	Oxaliplatin	Oprozomib	8000	0	33.5	0	nM
5	Oxaliplatin	Oprozomib	0	2.5	3.67	0	nM
5	Oxaliplatin	Oprozomib	1000	2.5	4.47	-4.95834	nM
5	Oxaliplatin	Oprozomib	2000	2.5	12.59	-6.71354	nM
5	Oxaliplatin	Oprozomib	4000	2.5	25.63	-0.650747	nM
5	Oxaliplatin	Oprozomib	8000	2.5	31.17	-2.52707	nM
5	Oxaliplatin	Oprozomib	0	5	6.04	0	nM
5	Oxaliplatin	Oprozomib	1000	5	0.74	-4.95834	nM
5	Oxaliplatin	Oprozomib	2000	5	9.9	-9.63106	nM
5	Oxaliplatin	Oprozomib	4000	5	27.68	1.57264	nM
5	Oxaliplatin	Oprozomib	8000	5	26.54	-7.54867	nM
5	Oxaliplatin	Oprozomib	0	10	6.92	0	nM
5	Oxaliplatin	Oprozomib	1000	10	-0.15	-4.95834	nM
5	Oxaliplatin	Oprozomib	2000	10	11.13	-8.29703	nM
5	Oxaliplatin	Oprozomib	4000	10	28.96	2.9609	nM
5	Oxaliplatin	Oprozomib	8000	10	29.92	-3.88279	nM
5	Oxaliplatin	Oprozomib	0	20	40.98	0	nM
5	Oxaliplatin	Oprozomib	1000	20	37.63	-6.80726	nM
5	Oxaliplatin	Oprozomib	2000	20	37.12	-11.8106	nM
5	Oxaliplatin	Oprozomib	4000	20	38.67	-15.3017	nM
5	Oxaliplatin	Oprozomib	8000	20	40.2	-18.6896	nM
6	5-Fluorouracil	VR-23	0	0	0	0	nM
6	5-Fluorouracil	VR-23	4000	0	38.48	0	nM
6	5-Fluorouracil	VR-23	8000	0	38.9	0	nM
6	5-Fluorouracil	VR-23	16000	0	52.1	0	nM
6	5-Fluorouracil	VR-23	32000	0	62.78	0	nM
6	5-Fluorouracil	VR-23	0	625	18.03	0	nM
6	5-Fluorouracil	VR-23	4000	625	52.35	17.8438	nM
6	5-Fluorouracil	VR-23	8000	625	61.67	29.2937	nM
6	5-Fluorouracil	VR-23	16000	625	74.34	28.6119	nM
6	5-Fluorouracil	VR-23	32000	625	83.59	26.7722	nM
6	5-Fluorouracil	VR-23	0	1250	19.68	0	nM
6	5-Fluorouracil	VR-23	4000	1250	53.49	19.3104	nM
6	5-Fluorouracil	VR-23	8000	1250	56.45	22.5782	nM
6	5-Fluorouracil	VR-23	16000	1250	71.08	24.4179	nM
6	5-Fluorouracil	VR-23	32000	1250	79.06	20.9443	nM
6	5-Fluorouracil	VR-23	0	2500	20.21	0	nM
6	5-Fluorouracil	VR-23	4000	2500	53.19	18.9245	nM
6	5-Fluorouracil	VR-23	8000	2500	62.07	29.8083	nM
6	5-Fluorouracil	VR-23	16000	2500	68.86	21.5618	nM
6	5-Fluorouracil	VR-23	32000	2500	78.85	20.6741	nM
6	5-Fluorouracil	VR-23	0	5000	66.09	0	nM
6	5-Fluorouracil	VR-23	4000	5000	59.95	-16.9969	nM
6	5-Fluorouracil	VR-23	8000	5000	67.05	-8.09842	nM
6	5-Fluorouracil	VR-23	16000	5000	71.72	-9.49884	nM
6	5-Fluorouracil	VR-23	32000	5000	78.8	-6.38446	nM
7	5-Fluorouracil	Oprozomib	0	0	0	0	nM
7	5-Fluorouracil	Oprozomib	4000	0	37.32	0	nM
7	5-Fluorouracil	Oprozomib	8000	0	39.11	0	nM
7	5-Fluorouracil	Oprozomib	16000	0	43.32	0	nM
7	5-Fluorouracil	Oprozomib	32000	0	52.95	0	nM
7	5-Fluorouracil	Oprozomib	0	2.5	4.33	0	nM
7	5-Fluorouracil	Oprozomib	4000	2.5	35.08	-2.69183	nM
7	5-Fluorouracil	Oprozomib	8000	2.5	41.83	3.26866	nM
7	5-Fluorouracil	Oprozomib	16000	2.5	58.55	18.3021	nM
7	5-Fluorouracil	Oprozomib	32000	2.5	66.11	15.8145	nM
7	5-Fluorouracil	Oprozomib	0	5	2.49	0	nM
7	5-Fluorouracil	Oprozomib	4000	5	34.46	-3.4369	nM
7	5-Fluorouracil	Oprozomib	8000	5	40.22	1.3339	nM
7	5-Fluorouracil	Oprozomib	16000	5	52.28	10.7673	nM
7	5-Fluorouracil	Oprozomib	32000	5	63.86	13.1107	nM
7	5-Fluorouracil	Oprozomib	0	10	2.12	0	nM
7	5-Fluorouracil	Oprozomib	4000	10	35	-2.78797	nM
7	5-Fluorouracil	Oprozomib	8000	10	44.32	6.26092	nM
7	5-Fluorouracil	Oprozomib	16000	10	53.24	11.921	nM
7	5-Fluorouracil	Oprozomib	32000	10	61.1	9.79395	nM
7	5-Fluorouracil	Oprozomib	0	20	44.17	0	nM
7	5-Fluorouracil	Oprozomib	4000	20	43.78	-17.0247	nM
7	5-Fluorouracil	Oprozomib	8000	20	47.69	-13.7691	nM
7	5-Fluorouracil	Oprozomib	16000	20	53.64	-10.0133	nM
7	5-Fluorouracil	Oprozomib	32000	20	60.05	-10.0744	nM
8	Cisplatin	Delanzomib	0	0	0	0	nM
8	Cisplatin	Delanzomib	500	0	22.78	0	nM
8	Cisplatin	Delanzomib	1000	0	7.57	0	nM
8	Cisplatin	Delanzomib	2000	0	13.63	0	nM
8	Cisplatin	Delanzomib	4000	0	47.87	0	nM
8	Cisplatin	Delanzomib	0	2.5	9.36	0	nM
8	Cisplatin	Delanzomib	500	2.5	-4.62	-14.3747	nM
8	Cisplatin	Delanzomib	1000	2.5	-2.7	0	nM
8	Cisplatin	Delanzomib	2000	2.5	10.95	-2.97172	nM
8	Cisplatin	Delanzomib	4000	2.5	56.7	9.79114	nM
8	Cisplatin	Delanzomib	0	5	6.85	0	nM
8	Cisplatin	Delanzomib	500	5	-3.48	-14.3747	nM
8	Cisplatin	Delanzomib	1000	5	-1.92	0	nM
8	Cisplatin	Delanzomib	2000	5	1.58	-4.2287	nM
8	Cisplatin	Delanzomib	4000	5	47.45	-0.465717	nM
8	Cisplatin	Delanzomib	0	10	5.13	0	nM
8	Cisplatin	Delanzomib	500	10	-5.66	-14.3747	nM
8	Cisplatin	Delanzomib	1000	10	0.38	0	nM
8	Cisplatin	Delanzomib	2000	10	3.87	-4.2287	nM
8	Cisplatin	Delanzomib	4000	10	45.81	-2.28423	nM
8	Cisplatin	Delanzomib	0	20	11.87	0	nM
8	Cisplatin	Delanzomib	500	20	-4.18	-16.3245	nM
8	Cisplatin	Delanzomib	1000	20	-2.35	-2.27712	nM
8	Cisplatin	Delanzomib	2000	20	8.35	-6.40953	nM
8	Cisplatin	Delanzomib	4000	20	48.75	-0.340489	nM
9	Cisplatin	Paclitaxel	0	0	0	0	nM
9	Cisplatin	Paclitaxel	500	0	12.72	0	nM
9	Cisplatin	Paclitaxel	1000	0	10.65	0	nM
9	Cisplatin	Paclitaxel	2000	0	15.64	0	nM
9	Cisplatin	Paclitaxel	4000	0	53.68	0	nM
9	Cisplatin	Paclitaxel	0	2.5	17.94	0	nM
9	Cisplatin	Paclitaxel	500	2.5	31.76	15.8693	nM
9	Cisplatin	Paclitaxel	1000	2.5	30.28	14.1699	nM
9	Cisplatin	Paclitaxel	2000	2.5	29.53	10.3588	nM
9	Cisplatin	Paclitaxel	4000	2.5	67.26	12.5239	nM
9	Cisplatin	Paclitaxel	0	5	35.47	0	nM
9	Cisplatin	Paclitaxel	500	5	41.68	7.13086	nM
9	Cisplatin	Paclitaxel	1000	5	39.95	5.14432	nM
9	Cisplatin	Paclitaxel	2000	5	40.56	3.52507	nM
9	Cisplatin	Paclitaxel	4000	5	59.11	-7.54123	nM
9	Cisplatin	Paclitaxel	0	10	54.15	0	nM
9	Cisplatin	Paclitaxel	500	10	49.54	-5.2936	nM
9	Cisplatin	Paclitaxel	1000	10	53.26	-1.02197	nM
9	Cisplatin	Paclitaxel	2000	10	56.85	1.45217	nM
9	Cisplatin	Paclitaxel	4000	10	61.32	-16.4125	nM
9	Cisplatin	Paclitaxel	0	20	64.36	0	nM
9	Cisplatin	Paclitaxel	500	20	60.36	-4.59315	nM
9	Cisplatin	Paclitaxel	1000	20	63.45	-1.04494	nM
9	Cisplatin	Paclitaxel	2000	20	64.66	-0.936693	nM
9	Cisplatin	Paclitaxel	4000	20	64.01	-19.5594	nM
10	Cisplatin	5-Fluorouracil	0	0	0	0	nM
10	Cisplatin	5-Fluorouracil	500	0	8.73	0	nM
10	Cisplatin	5-Fluorouracil	1000	0	7.67	0	nM
10	Cisplatin	5-Fluorouracil	2000	0	11.88	0	nM
10	Cisplatin	5-Fluorouracil	4000	0	50.06	0	nM
10	Cisplatin	5-Fluorouracil	0	4000	29.33	0	nM
10	Cisplatin	5-Fluorouracil	500	4000	23.58	-6.82906	nM
10	Cisplatin	5-Fluorouracil	1000	4000	25.94	-4.02617	nM
10	Cisplatin	5-Fluorouracil	2000	4000	29.23	-0.118766	nM
10	Cisplatin	5-Fluorouracil	4000	4000	67.76	11.4914	nM
10	Cisplatin	5-Fluorouracil	0	8000	32.43	0	nM
10	Cisplatin	5-Fluorouracil	500	8000	28.36	-4.83378	nM
10	Cisplatin	5-Fluorouracil	1000	8000	25.6	-8.11173	nM
10	Cisplatin	5-Fluorouracil	2000	8000	30.07	-2.80288	nM
10	Cisplatin	5-Fluorouracil	4000	8000	53.7	-7.39081	nM
10	Cisplatin	5-Fluorouracil	0	16000	38.72	0	nM
10	Cisplatin	5-Fluorouracil	500	16000	38.52	-0.237532	nM
10	Cisplatin	5-Fluorouracil	1000	16000	37.79	-1.10453	nM
10	Cisplatin	5-Fluorouracil	2000	16000	35.44	-3.89553	nM
10	Cisplatin	5-Fluorouracil	4000	16000	62.7	-1.13269	nM
10	Cisplatin	5-Fluorouracil	0	32000	48.42	0	nM
10	Cisplatin	5-Fluorouracil	500	32000	51.63	3.81239	nM
10	Cisplatin	5-Fluorouracil	1000	32000	45.69	-3.24232	nM
10	Cisplatin	5-Fluorouracil	2000	32000	43.92	-5.34448	nM
10	Cisplatin	5-Fluorouracil	4000	32000	63.53	-6.97984	nM
11	Anlotinib	Bortezomibl	0	0	0	0	nM
11	Anlotinib	Bortezomibl	1000	0	11.68	0	nM
11	Anlotinib	Bortezomibl	2000	0	12.41	0	nM
11	Anlotinib	Bortezomibl	4000	0	62.68	0	nM
11	Anlotinib	Bortezomibl	8000	0	75.91	0	nM
11	Anlotinib	Bortezomibl	0	1.25	-1.08	0	nM
11	Anlotinib	Bortezomibl	1000	1.25	1.32	-6.99924	nM
11	Anlotinib	Bortezomibl	2000	1.25	10.47	-2.04282	nM
11	Anlotinib	Bortezomibl	4000	1.25	69.68	7.37098	nM
11	Anlotinib	Bortezomibl	8000	1.25	79.51	3.79079	nM
11	Anlotinib	Bortezomibl	0	2.5	4.23	0	nM
11	Anlotinib	Bortezomibl	1000	2.5	-0.84	-6.99924	nM
11	Anlotinib	Bortezomibl	2000	2.5	9.85	-2.69567	nM
11	Anlotinib	Bortezomibl	4000	2.5	63.99	1.37943	nM
11	Anlotinib	Bortezomibl	8000	2.5	76.33	0.442259	nM
11	Anlotinib	Bortezomibl	0	5	49.61	0	nM
11	Anlotinib	Bortezomibl	1000	5	44.38	-9.22102	nM
11	Anlotinib	Bortezomibl	2000	5	56.72	3.36511	nM
11	Anlotinib	Bortezomibl	4000	5	66.9	-14.0026	nM
11	Anlotinib	Bortezomibl	8000	5	74.72	-13.1601	nM
11	Anlotinib	Bortezomibl	0	10	73.63	0	nM
11	Anlotinib	Bortezomibl	1000	10	73.79	-1.77504	nM
11	Anlotinib	Bortezomibl	2000	10	75.57	-0.114149	nM
11	Anlotinib	Bortezomibl	4000	10	66.5	-24.3634	nM
11	Anlotinib	Bortezomibl	8000	10	78.25	-15.859	nM
12	Anlotinib	Carfilzomib	0	0	0	0	nM
12	Anlotinib	Carfilzomib	1000	0	16.14	0	nM
12	Anlotinib	Carfilzomib	2000	0	18.97	0	nM
12	Anlotinib	Carfilzomib	4000	0	54.25	0	nM
12	Anlotinib	Carfilzomib	8000	0	68.46	0	nM
12	Anlotinib	Carfilzomib	0	1.25	14.74	0	nM
12	Anlotinib	Carfilzomib	1000	1.25	7.17	-5.01492	nM
12	Anlotinib	Carfilzomib	2000	1.25	16.95	-3.94356	nM
12	Anlotinib	Carfilzomib	4000	1.25	58.31	3.76753	nM
12	Anlotinib	Carfilzomib	8000	1.25	67.04	-2.26543	nM
12	Anlotinib	Carfilzomib	0	2.5	14.02	0	nM
12	Anlotinib	Carfilzomib	1000	2.5	79.67	72.3549	nM
12	Anlotinib	Carfilzomib	2000	2.5	23.06	3.87386	nM
12	Anlotinib	Carfilzomib	4000	2.5	57.19	2.91422	nM
12	Anlotinib	Carfilzomib	8000	2.5	67.85	-1.03015	nM
12	Anlotinib	Carfilzomib	0	5	42.82	0	nM
12	Anlotinib	Carfilzomib	1000	5	81.04	41.8489	nM
12	Anlotinib	Carfilzomib	2000	5	40.3	-7.25763	nM
12	Anlotinib	Carfilzomib	4000	5	68.31	-1.77296	nM
12	Anlotinib	Carfilzomib	8000	5	66.79	-14.3192	nM
12	Anlotinib	Carfilzomib	0	10	57.67	0	nM
12	Anlotinib	Carfilzomib	1000	10	76.47	20.0377	nM
12	Anlotinib	Carfilzomib	2000	10	58.69	-2.04691	nM
12	Anlotinib	Carfilzomib	4000	10	62.57	-17.4144	nM
12	Anlotinib	Carfilzomib	8000	10	61.83	-26.2583	nM
Abbreviations: conc, concentration.

## Sheet: KYSE-140
Table S4: The individual synergy score at each dose combination for 12 drug combinations in four cell lines (KYSE-30, KYSE-70, KYSE-140 and OE-33).
PairIndex	Drug1	Drug2	Conc1	Conc2	Relative_inhibition	Synergy	concUnit
1	Oxaliplatin	5-Fluorouracil	0	0	0	0	nM
1	Oxaliplatin	5-Fluorouracil	1000	0	16.64	0	nM
1	Oxaliplatin	5-Fluorouracil	2000	0	25.44	0	nM
1	Oxaliplatin	5-Fluorouracil	4000	0	28.22	0	nM
1	Oxaliplatin	5-Fluorouracil	8000	0	44.79	0	nM
1	Oxaliplatin	5-Fluorouracil	0	4000	15.31	0	nM
1	Oxaliplatin	5-Fluorouracil	1000	4000	17	-0.377652	nM
1	Oxaliplatin	5-Fluorouracil	2000	4000	29.17	3.65336	nM
1	Oxaliplatin	5-Fluorouracil	4000	4000	25.85	-3.46375	nM
1	Oxaliplatin	5-Fluorouracil	8000	4000	41.29	-4.62824	nM
1	Oxaliplatin	5-Fluorouracil	0	8000	21.79	0	nM
1	Oxaliplatin	5-Fluorouracil	1000	8000	20.22	-4.01514	nM
1	Oxaliplatin	5-Fluorouracil	2000	8000	26.21	-6.4395	nM
1	Oxaliplatin	5-Fluorouracil	4000	8000	30.64	-4.23345	nM
1	Oxaliplatin	5-Fluorouracil	8000	8000	43.41	-7.05217	nM
1	Oxaliplatin	5-Fluorouracil	0	16000	25.94	0	nM
1	Oxaliplatin	5-Fluorouracil	1000	16000	35.82	9.50956	nM
1	Oxaliplatin	5-Fluorouracil	2000	16000	35.55	0.25492	nM
1	Oxaliplatin	5-Fluorouracil	4000	16000	29.66	-9.46665	nM
1	Oxaliplatin	5-Fluorouracil	8000	16000	38.17	-16.3312	nM
1	Oxaliplatin	5-Fluorouracil	0	32000	38.28	0	nM
1	Oxaliplatin	5-Fluorouracil	1000	32000	36.18	-4.17693	nM
1	Oxaliplatin	5-Fluorouracil	2000	32000	35.78	-12.0945	nM
1	Oxaliplatin	5-Fluorouracil	4000	32000	34.58	-15.853	nM
1	Oxaliplatin	5-Fluorouracil	8000	32000	44.25	-18.5547	nM
2	Oxaliplatin	Delanzomib	0	0	0	0	nM
2	Oxaliplatin	Delanzomib	1000	0	15.54	0	nM
2	Oxaliplatin	Delanzomib	2000	0	29.87	0	nM
2	Oxaliplatin	Delanzomib	4000	0	27.46	0	nM
2	Oxaliplatin	Delanzomib	8000	0	39.93	0	nM
2	Oxaliplatin	Delanzomib	0	2.5	-3.18	0	nM
2	Oxaliplatin	Delanzomib	1000	2.5	7.87	-8.32026	nM
2	Oxaliplatin	Delanzomib	2000	2.5	25.21	-5.05507	nM
2	Oxaliplatin	Delanzomib	4000	2.5	27.72	0.282043	nM
2	Oxaliplatin	Delanzomib	8000	2.5	40.5	0.618325	nM
2	Oxaliplatin	Delanzomib	0	5	3.49	0	nM
2	Oxaliplatin	Delanzomib	1000	5	5.31	-8.37949	nM
2	Oxaliplatin	Delanzomib	2000	5	20.96	-9.66539	nM
2	Oxaliplatin	Delanzomib	4000	5	24.78	-2.90721	nM
2	Oxaliplatin	Delanzomib	8000	5	42.93	3.25434	nM
2	Oxaliplatin	Delanzomib	0	10	-7.99	0	nM
2	Oxaliplatin	Delanzomib	1000	10	7.43	-8.37949	nM
2	Oxaliplatin	Delanzomib	2000	10	29.02	-0.922063	nM
2	Oxaliplatin	Delanzomib	4000	10	28.01	0.596629	nM
2	Oxaliplatin	Delanzomib	8000	10	43.25	3.60147	nM
2	Oxaliplatin	Delanzomib	0	20	2.06	0	nM
2	Oxaliplatin	Delanzomib	1000	20	11.27	-4.63201	nM
2	Oxaliplatin	Delanzomib	2000	20	29.98	0.119326	nM
2	Oxaliplatin	Delanzomib	4000	20	29.77	2.50584	nM
2	Oxaliplatin	Delanzomib	8000	20	47.23	7.91889	nM
3	Oxaliplatin	Ixazomib citrate	0	0	0	0	nM
3	Oxaliplatin	Ixazomib citrate	1000	0	10.81	0	nM
3	Oxaliplatin	Ixazomib citrate	2000	0	24.09	0	nM
3	Oxaliplatin	Ixazomib citrate	4000	0	33.5	0	nM
3	Oxaliplatin	Ixazomib citrate	8000	0	40.09	0	nM
3	Oxaliplatin	Ixazomib citrate	0	8	17.27	0	nM
3	Oxaliplatin	Ixazomib citrate	1000	8	16.02	-1.43127	nM
3	Oxaliplatin	Ixazomib citrate	2000	8	31.24	3.60389	nM
3	Oxaliplatin	Ixazomib citrate	4000	8	24.2	-14.6635	nM
3	Oxaliplatin	Ixazomib citrate	8000	8	40.72	-2.89564	nM
3	Oxaliplatin	Ixazomib citrate	0	16	20.02	0	nM
3	Oxaliplatin	Ixazomib citrate	1000	16	22.95	3.3549	nM
3	Oxaliplatin	Ixazomib citrate	2000	16	32.77	2.61889	nM
3	Oxaliplatin	Ixazomib citrate	4000	16	28.49	-12.149	nM
3	Oxaliplatin	Ixazomib citrate	8000	16	39.67	-6.25791	nM
3	Oxaliplatin	Ixazomib citrate	0	32	24.36	0	nM
3	Oxaliplatin	Ixazomib citrate	1000	32	24.05	-0.354955	nM
3	Oxaliplatin	Ixazomib citrate	2000	32	29.42	-5.53621	nM
3	Oxaliplatin	Ixazomib citrate	4000	32	22.99	-22.2305	nM
3	Oxaliplatin	Ixazomib citrate	8000	32	36.95	-12.7812	nM
3	Oxaliplatin	Ixazomib citrate	0	64	44.71	0	nM
3	Oxaliplatin	Ixazomib citrate	1000	64	42.33	-2.72514	nM
3	Oxaliplatin	Ixazomib citrate	2000	64	40.87	-12.6787	nM
3	Oxaliplatin	Ixazomib citrate	4000	64	43.47	-16.5228	nM
3	Oxaliplatin	Ixazomib citrate	8000	64	48.43	-15.6205	nM
4	Oxaliplatin	VR-23	0	0	0	0	nM
4	Oxaliplatin	VR-23	1000	0	5.3	0	nM
4	Oxaliplatin	VR-23	2000	0	16.65	0	nM
4	Oxaliplatin	VR-23	4000	0	22.4	0	nM
4	Oxaliplatin	VR-23	8000	0	44.97	0	nM
4	Oxaliplatin	VR-23	0	625	1.58	0	nM
4	Oxaliplatin	VR-23	1000	625	14.42	8.82832	nM
4	Oxaliplatin	VR-23	2000	625	34.46	18.9737	nM
4	Oxaliplatin	VR-23	4000	625	33.81	12.1555	nM
4	Oxaliplatin	VR-23	8000	625	52.97	8.52271	nM
4	Oxaliplatin	VR-23	0	1250	13.65	0	nM
4	Oxaliplatin	VR-23	1000	1250	22.32	9.23649	nM
4	Oxaliplatin	VR-23	2000	1250	28.09	5.07668	nM
4	Oxaliplatin	VR-23	4000	1250	35.23	7.04805	nM
4	Oxaliplatin	VR-23	8000	1250	53.34	4.22214	nM
4	Oxaliplatin	VR-23	0	2500	15.97	0	nM
4	Oxaliplatin	VR-23	1000	2500	24.82	9.42825	nM
4	Oxaliplatin	VR-23	2000	2500	33.94	9.11424	nM
4	Oxaliplatin	VR-23	4000	2500	34.5	4.22708	nM
4	Oxaliplatin	VR-23	8000	2500	64.68	14.8541	nM
4	Oxaliplatin	VR-23	0	5000	70.59	0	nM
4	Oxaliplatin	VR-23	1000	5000	68.66	-2.0561	nM
4	Oxaliplatin	VR-23	2000	5000	70.49	-3.61694	nM
4	Oxaliplatin	VR-23	4000	5000	76.39	0.749282	nM
4	Oxaliplatin	VR-23	8000	5000	83.95	1.26965	nM
5	Oxaliplatin	Oprozomib	0	0	0	0	nM
5	Oxaliplatin	Oprozomib	1000	0	12.59	0	nM
5	Oxaliplatin	Oprozomib	2000	0	21.29	0	nM
5	Oxaliplatin	Oprozomib	4000	0	28.4	0	nM
5	Oxaliplatin	Oprozomib	8000	0	37.37	0	nM
5	Oxaliplatin	Oprozomib	0	2.5	0.71	0	nM
5	Oxaliplatin	Oprozomib	1000	2.5	23.3	11.5484	nM
5	Oxaliplatin	Oprozomib	2000	2.5	20.02	-1.36941	nM
5	Oxaliplatin	Oprozomib	4000	2.5	27.1	-1.40176	nM
5	Oxaliplatin	Oprozomib	8000	2.5	40.09	2.93292	nM
5	Oxaliplatin	Oprozomib	0	5	6.79	0	nM
5	Oxaliplatin	Oprozomib	1000	5	26.27	14.7508	nM
5	Oxaliplatin	Oprozomib	2000	5	19.11	-2.35065	nM
5	Oxaliplatin	Oprozomib	4000	5	26.65	-1.88699	nM
5	Oxaliplatin	Oprozomib	8000	5	38.26	0.959667	nM
5	Oxaliplatin	Oprozomib	0	10	6.61	0	nM
5	Oxaliplatin	Oprozomib	1000	10	19.14	7.06272	nM
5	Oxaliplatin	Oprozomib	2000	10	24.07	2.99761	nM
5	Oxaliplatin	Oprozomib	4000	10	22.89	-5.94131	nM
5	Oxaliplatin	Oprozomib	8000	10	38.06	0.744012	nM
5	Oxaliplatin	Oprozomib	0	20	34.87	0	nM
5	Oxaliplatin	Oprozomib	1000	20	32.47	-6.62441	nM
5	Oxaliplatin	Oprozomib	2000	20	35.74	-9.68656	nM
5	Oxaliplatin	Oprozomib	4000	20	34.11	-16.8282	nM
5	Oxaliplatin	Oprozomib	8000	20	40.82	-16.3856	nM
6	5-Fluorouracil	VR-23	0	0	0	0	nM
6	5-Fluorouracil	VR-23	4000	0	14.83	0	nM
6	5-Fluorouracil	VR-23	8000	0	25.28	0	nM
6	5-Fluorouracil	VR-23	16000	0	32.31	0	nM
6	5-Fluorouracil	VR-23	32000	0	37.24	0	nM
6	5-Fluorouracil	VR-23	0	625	17.77	0	nM
6	5-Fluorouracil	VR-23	4000	625	29.47	11.8284	nM
6	5-Fluorouracil	VR-23	8000	625	27.58	-1.78495	nM
6	5-Fluorouracil	VR-23	16000	625	38.43	3.0389	nM
6	5-Fluorouracil	VR-23	32000	625	44.31	4.42752	nM
6	5-Fluorouracil	VR-23	0	1250	13.39	0	nM
6	5-Fluorouracil	VR-23	4000	1250	31.05	18.6143	nM
6	5-Fluorouracil	VR-23	8000	1250	26.84	1.71592	nM
6	5-Fluorouracil	VR-23	16000	1250	44.24	13.6854	nM
6	5-Fluorouracil	VR-23	32000	1250	42.55	6.05485	nM
6	5-Fluorouracil	VR-23	0	2500	35.39	0	nM
6	5-Fluorouracil	VR-23	4000	2500	28.29	-9.49983	nM
6	5-Fluorouracil	VR-23	8000	2500	42.33	-2.28828	nM
6	5-Fluorouracil	VR-23	16000	2500	42.29	-8.37776	nM
6	5-Fluorouracil	VR-23	32000	2500	50.29	-3.38798	nM
6	5-Fluorouracil	VR-23	0	5000	75.74	0	nM
6	5-Fluorouracil	VR-23	4000	5000	59.07	-19.7205	nM
6	5-Fluorouracil	VR-23	8000	5000	67.48	-13.3928	nM
6	5-Fluorouracil	VR-23	16000	5000	69.62	-13.1935	nM
6	5-Fluorouracil	VR-23	32000	5000	70.96	-13.2392	nM
7	5-Fluorouracil	Oprozomib	0	0	0	0	nM
7	5-Fluorouracil	Oprozomib	4000	0	11.38	0	nM
7	5-Fluorouracil	Oprozomib	8000	0	26.89	0	nM
7	5-Fluorouracil	Oprozomib	16000	0	29.23	0	nM
7	5-Fluorouracil	Oprozomib	32000	0	39.44	0	nM
7	5-Fluorouracil	Oprozomib	0	2.5	3.88	0	nM
7	5-Fluorouracil	Oprozomib	4000	2.5	12.02	0.693285	nM
7	5-Fluorouracil	Oprozomib	8000	2.5	31.53	5.02632	nM
7	5-Fluorouracil	Oprozomib	16000	2.5	45.3	17.408	nM
7	5-Fluorouracil	Oprozomib	32000	2.5	43.96	4.89633	nM
7	5-Fluorouracil	Oprozomib	0	5	5.89	0	nM
7	5-Fluorouracil	Oprozomib	4000	5	32.69	23.0842	nM
7	5-Fluorouracil	Oprozomib	8000	5	29.78	3.13062	nM
7	5-Fluorouracil	Oprozomib	16000	5	38.59	10.1393	nM
7	5-Fluorouracil	Oprozomib	32000	5	40.59	1.24575	nM
7	5-Fluorouracil	Oprozomib	0	10	19.24	0	nM
7	5-Fluorouracil	Oprozomib	4000	10	29.37	7.47258	nM
7	5-Fluorouracil	Oprozomib	8000	10	35.69	-0.37969	nM
7	5-Fluorouracil	Oprozomib	16000	10	42.26	4.51975	nM
7	5-Fluorouracil	Oprozomib	32000	10	43.78	-3.50947	nM
7	5-Fluorouracil	Oprozomib	0	20	33.22	0	nM
7	5-Fluorouracil	Oprozomib	4000	20	34.61	-1.38908	nM
7	5-Fluorouracil	Oprozomib	8000	20	41.36	-6.23117	nM
7	5-Fluorouracil	Oprozomib	16000	20	37.42	-12.3329	nM
7	5-Fluorouracil	Oprozomib	32000	20	49.48	-7.26965	nM
8	Cisplatin	Delanzomib	0	0	0	0	nM
8	Cisplatin	Delanzomib	500	0	8.1	0	nM
8	Cisplatin	Delanzomib	1000	0	29.69	0	nM
8	Cisplatin	Delanzomib	2000	0	49.66	0	nM
8	Cisplatin	Delanzomib	4000	0	83.41	0	nM
8	Cisplatin	Delanzomib	0	2.5	8.73	0	nM
8	Cisplatin	Delanzomib	500	2.5	8.33	-0.731651	nM
8	Cisplatin	Delanzomib	1000	2.5	33.67	3.56711	nM
8	Cisplatin	Delanzomib	2000	2.5	61.17	11.9494	nM
8	Cisplatin	Delanzomib	4000	2.5	85.35	1.92752	nM
8	Cisplatin	Delanzomib	0	5	6.43	0	nM
8	Cisplatin	Delanzomib	500	5	1.06	-0.300663	nM
8	Cisplatin	Delanzomib	1000	5	28.98	-0.770256	nM
8	Cisplatin	Delanzomib	2000	5	57.47	8.47282	nM
8	Cisplatin	Delanzomib	4000	5	84.72	1.42118	nM
8	Cisplatin	Delanzomib	0	10	5.8	0	nM
8	Cisplatin	Delanzomib	500	10	10.83	2.96169	nM
8	Cisplatin	Delanzomib	1000	10	23.49	-6.72618	nM
8	Cisplatin	Delanzomib	2000	10	55.88	6.74788	nM
8	Cisplatin	Delanzomib	4000	10	81.55	-2.01785	nM
8	Cisplatin	Delanzomib	0	20	23.46	0	nM
8	Cisplatin	Delanzomib	500	20	8.58	-16.3925	nM
8	Cisplatin	Delanzomib	1000	20	29.03	-13.6558	nM
8	Cisplatin	Delanzomib	2000	20	54.05	-4.50198	nM
8	Cisplatin	Delanzomib	4000	20	82.6	-3.93196	nM
9	Cisplatin	Paclitaxel	0	0	0	0	nM
9	Cisplatin	Paclitaxel	500	0	18.47	0	nM
9	Cisplatin	Paclitaxel	1000	0	36.07	0	nM
9	Cisplatin	Paclitaxel	2000	0	58.63	0	nM
9	Cisplatin	Paclitaxel	4000	0	84.96	0	nM
9	Cisplatin	Paclitaxel	0	2.5	37.09	0	nM
9	Cisplatin	Paclitaxel	500	2.5	36.1	-1.26604	nM
9	Cisplatin	Paclitaxel	1000	2.5	36.07	-15.9824	nM
9	Cisplatin	Paclitaxel	2000	2.5	61.17	-7.09419	nM
9	Cisplatin	Paclitaxel	4000	2.5	84.88	-3.86228	nM
9	Cisplatin	Paclitaxel	0	5	51.92	0	nM
9	Cisplatin	Paclitaxel	500	5	46.29	-7.19979	nM
9	Cisplatin	Paclitaxel	1000	5	50.27	-13.3279	nM
9	Cisplatin	Paclitaxel	2000	5	59.73	-18.9692	nM
9	Cisplatin	Paclitaxel	4000	5	86.49	-5.45101	nM
9	Cisplatin	Paclitaxel	0	10	57.67	0	nM
9	Cisplatin	Paclitaxel	500	10	55.92	-2.23795	nM
9	Cisplatin	Paclitaxel	1000	10	54.4	-14.0581	nM
9	Cisplatin	Paclitaxel	2000	10	66.61	-14.0611	nM
9	Cisplatin	Paclitaxel	4000	10	85.54	-8.08019	nM
9	Cisplatin	Paclitaxel	0	20	61.46	0	nM
9	Cisplatin	Paclitaxel	500	20	56.3	-6.59875	nM
9	Cisplatin	Paclitaxel	1000	20	58.53	-12.739	nM
9	Cisplatin	Paclitaxel	2000	20	57.32	-28.5055	nM
9	Cisplatin	Paclitaxel	4000	20	86.67	-7.56731	nM
10	Cisplatin	5-Fluorouracil	0	0	0	0	nM
10	Cisplatin	5-Fluorouracil	500	0	19.22	0	nM
10	Cisplatin	5-Fluorouracil	1000	0	36.23	0	nM
10	Cisplatin	5-Fluorouracil	2000	0	51.42	0	nM
10	Cisplatin	5-Fluorouracil	4000	0	87.52	0	nM
10	Cisplatin	5-Fluorouracil	0	4000	13.72	0	nM
10	Cisplatin	5-Fluorouracil	500	4000	30.07	12.7223	nM
10	Cisplatin	5-Fluorouracil	1000	4000	41	5.5931	nM
10	Cisplatin	5-Fluorouracil	2000	4000	58.97	8.85281	nM
10	Cisplatin	5-Fluorouracil	4000	4000	83.51	-4.70196	nM
10	Cisplatin	5-Fluorouracil	0	8000	23.37	0	nM
10	Cisplatin	5-Fluorouracil	500	8000	27.62	0.238455	nM
10	Cisplatin	5-Fluorouracil	1000	8000	39.55	-3.69433	nM
10	Cisplatin	5-Fluorouracil	2000	8000	60.48	4.84343	nM
10	Cisplatin	5-Fluorouracil	4000	8000	85.52	-3.82996	nM
10	Cisplatin	5-Fluorouracil	0	16000	34.73	0	nM
10	Cisplatin	5-Fluorouracil	500	16000	43.39	6.11285	nM
10	Cisplatin	5-Fluorouracil	1000	16000	44.6	-7.733	nM
10	Cisplatin	5-Fluorouracil	2000	16000	67.21	5.14714	nM
10	Cisplatin	5-Fluorouracil	4000	16000	86.42	-4.72388	nM
10	Cisplatin	5-Fluorouracil	0	32000	42.44	0	nM
10	Cisplatin	5-Fluorouracil	500	32000	38.73	-7.9143	nM
10	Cisplatin	5-Fluorouracil	1000	32000	48.85	-9.50952	nM
10	Cisplatin	5-Fluorouracil	2000	32000	72.13	5.76644	nM
10	Cisplatin	5-Fluorouracil	4000	32000	91.08	-0.582694	nM
11	Anlotinib	Bortezomibl	0	0	0	0	nM
11	Anlotinib	Bortezomibl	1000	0	14.75	0	nM
11	Anlotinib	Bortezomibl	2000	0	22.47	0	nM
11	Anlotinib	Bortezomibl	4000	0	33.07	0	nM
11	Anlotinib	Bortezomibl	8000	0	47.19	0	nM
11	Anlotinib	Bortezomibl	0	1.25	4.13	0	nM
11	Anlotinib	Bortezomibl	1000	1.25	13.03	-1.9055	nM
11	Anlotinib	Bortezomibl	2000	1.25	17.96	-4.99639	nM
11	Anlotinib	Bortezomibl	4000	1.25	46.36	14.7233	nM
11	Anlotinib	Bortezomibl	8000	1.25	55.39	9.08434	nM
11	Anlotinib	Bortezomibl	0	2.5	20.21	0	nM
11	Anlotinib	Bortezomibl	1000	2.5	12.28	-13.6965	nM
11	Anlotinib	Bortezomibl	2000	2.5	24.4	-7.82948	nM
11	Anlotinib	Bortezomibl	4000	2.5	47.21	7.06011	nM
11	Anlotinib	Bortezomibl	8000	2.5	55.98	2.94847	nM
11	Anlotinib	Bortezomibl	0	5	27.84	0	nM
11	Anlotinib	Bortezomibl	1000	5	33.2	1.49641	nM
11	Anlotinib	Bortezomibl	2000	5	29.36	-9.59484	nM
11	Anlotinib	Bortezomibl	4000	5	50.25	4.16032	nM
11	Anlotinib	Bortezomibl	8000	5	55.85	-2.14093	nM
11	Anlotinib	Bortezomibl	0	10	52.78	0	nM
11	Anlotinib	Bortezomibl	1000	10	46.7	-9.64223	nM
11	Anlotinib	Bortezomibl	2000	10	50.43	-9.98403	nM
11	Anlotinib	Bortezomibl	4000	10	54.25	-11.8952	nM
11	Anlotinib	Bortezomibl	8000	10	57.67	-16.2895	nM
12	Anlotinib	Carfilzomib	0	0	0	0	nM
12	Anlotinib	Carfilzomib	1000	0	-0.4	0	nM
12	Anlotinib	Carfilzomib	2000	0	23.22	0	nM
12	Anlotinib	Carfilzomib	4000	0	32.76	0	nM
12	Anlotinib	Carfilzomib	8000	0	56.19	0	nM
12	Anlotinib	Carfilzomib	0	1.25	-0.07	0	nM
12	Anlotinib	Carfilzomib	1000	1.25	25.13	23.973	nM
12	Anlotinib	Carfilzomib	2000	1.25	28.43	5.29051	nM
12	Anlotinib	Carfilzomib	4000	1.25	55.16	22.7462	nM
12	Anlotinib	Carfilzomib	8000	1.25	57.37	1.19823	nM
12	Anlotinib	Carfilzomib	0	2.5	42.56	0	nM
12	Anlotinib	Carfilzomib	1000	2.5	79.67	37.6835	nM
12	Anlotinib	Carfilzomib	2000	2.5	40.35	-15.0958	nM
12	Anlotinib	Carfilzomib	4000	2.5	62.53	1.77654	nM
12	Anlotinib	Carfilzomib	8000	2.5	70.71	-3.79441	nM
12	Anlotinib	Carfilzomib	0	5	55.41	0	nM
12	Anlotinib	Carfilzomib	1000	5	81.04	26.0261	nM
12	Anlotinib	Carfilzomib	2000	5	63.04	-2.22865	nM
12	Anlotinib	Carfilzomib	4000	5	63.38	-6.26977	nM
12	Anlotinib	Carfilzomib	8000	5	72.32	-7.96445	nM
12	Anlotinib	Carfilzomib	0	10	66.76	0	nM
12	Anlotinib	Carfilzomib	1000	10	76.47	9.86005	nM
12	Anlotinib	Carfilzomib	2000	10	68.1	-6.07641	nM
12	Anlotinib	Carfilzomib	4000	10	67.55	-9.90477	nM
12	Anlotinib	Carfilzomib	8000	10	81.79	-3.47541	nM
Abbreviations: conc, concentration.

## Sheet: OE-33
Table S4: The individual synergy score at each dose combination for 12 drug combinations in four cell lines (KYSE-30, KYSE-70, KYSE-140 and OE-33).
PairIndex	Drug1	Drug2	Conc1	Conc2	Relative_inhibition	Synergy	concUnit
1	Oxaliplatin	5-Fluorouracil	0	0	0	0	nM
1	Oxaliplatin	5-Fluorouracil	1000	0	6.83	0	nM
1	Oxaliplatin	5-Fluorouracil	2000	0	15.61	0	nM
1	Oxaliplatin	5-Fluorouracil	4000	0	23.56	0	nM
1	Oxaliplatin	5-Fluorouracil	8000	0	38.34	0	nM
1	Oxaliplatin	5-Fluorouracil	0	4000	18.86	0	nM
1	Oxaliplatin	5-Fluorouracil	1000	4000	10.91	-7.79479	nM
1	Oxaliplatin	5-Fluorouracil	2000	4000	13.16	-10.2592	nM
1	Oxaliplatin	5-Fluorouracil	4000	4000	32.13	2.96782	nM
1	Oxaliplatin	5-Fluorouracil	8000	4000	35.53	-8.65491	nM
1	Oxaliplatin	5-Fluorouracil	0	8000	26.57	0	nM
1	Oxaliplatin	5-Fluorouracil	1000	8000	23.63	-3.34093	nM
1	Oxaliplatin	5-Fluorouracil	2000	8000	27.54	-2.32023	nM
1	Oxaliplatin	5-Fluorouracil	4000	8000	29.55	-7.57457	nM
1	Oxaliplatin	5-Fluorouracil	8000	8000	31.26	-19.6462	nM
1	Oxaliplatin	5-Fluorouracil	0	16000	29.06	0	nM
1	Oxaliplatin	5-Fluorouracil	1000	16000	28.92	-0.159092	nM
1	Oxaliplatin	5-Fluorouracil	2000	16000	27.34	-5.26102	nM
1	Oxaliplatin	5-Fluorouracil	4000	16000	29.03	-10.6234	nM
1	Oxaliplatin	5-Fluorouracil	8000	16000	38.31	-13.6175	nM
1	Oxaliplatin	5-Fluorouracil	0	32000	41.04	0	nM
1	Oxaliplatin	5-Fluorouracil	1000	32000	38.03	-3.42048	nM
1	Oxaliplatin	5-Fluorouracil	2000	32000	42.38	-1.22534	nM
1	Oxaliplatin	5-Fluorouracil	4000	32000	38.58	-11.5965	nM
1	Oxaliplatin	5-Fluorouracil	8000	32000	43.7	-17.0314	nM
2	Oxaliplatin	Delanzomib	0	0	0	0	nM
2	Oxaliplatin	Delanzomib	1000	0	15.73	0	nM
2	Oxaliplatin	Delanzomib	2000	0	18.51	0	nM
2	Oxaliplatin	Delanzomib	4000	0	32.95	0	nM
2	Oxaliplatin	Delanzomib	8000	0	42.22	0	nM
2	Oxaliplatin	Delanzomib	0	2.5	4.96	0	nM
2	Oxaliplatin	Delanzomib	1000	2.5	-4.38	-6.33887	nM
2	Oxaliplatin	Delanzomib	2000	2.5	2.08	-9.42867	nM
2	Oxaliplatin	Delanzomib	4000	2.5	24.19	-9.73622	nM
2	Oxaliplatin	Delanzomib	8000	2.5	39.52	-3.00089	nM
2	Oxaliplatin	Delanzomib	0	5	9.5	0	nM
2	Oxaliplatin	Delanzomib	1000	5	1.63	-6.33887	nM
2	Oxaliplatin	Delanzomib	2000	5	-2.33	-9.42867	nM
2	Oxaliplatin	Delanzomib	4000	5	23.87	-10.0919	nM
2	Oxaliplatin	Delanzomib	8000	5	41.48	-0.822466	nM
2	Oxaliplatin	Delanzomib	0	10	12.09	0	nM
2	Oxaliplatin	Delanzomib	1000	10	-6.99	-8.48673	nM
2	Oxaliplatin	Delanzomib	2000	10	-0.17	-11.5057	nM
2	Oxaliplatin	Delanzomib	4000	10	36.58	2.32557	nM
2	Oxaliplatin	Delanzomib	8000	10	40.28	-3.62888	nM
2	Oxaliplatin	Delanzomib	0	20	43.04	0	nM
2	Oxaliplatin	Delanzomib	1000	20	44.26	-2.65703	nM
2	Oxaliplatin	Delanzomib	2000	20	47.36	-1.16765	nM
2	Oxaliplatin	Delanzomib	4000	20	35.99	-23.9651	nM
2	Oxaliplatin	Delanzomib	8000	20	45.13	-20.3292	nM
3	Oxaliplatin	Ixazomib citrate	0	0	0	0	nM
3	Oxaliplatin	Ixazomib citrate	1000	0	24.38	0	nM
3	Oxaliplatin	Ixazomib citrate	2000	0	15.41	0	nM
3	Oxaliplatin	Ixazomib citrate	4000	0	19.64	0	nM
3	Oxaliplatin	Ixazomib citrate	8000	0	42.08	0	nM
3	Oxaliplatin	Ixazomib citrate	0	8	7.88	0	nM
3	Oxaliplatin	Ixazomib citrate	1000	8	-12.08	-14.643	nM
3	Oxaliplatin	Ixazomib citrate	2000	8	6.29	-4.51795	nM
3	Oxaliplatin	Ixazomib citrate	4000	8	21.21	1.77216	nM
3	Oxaliplatin	Ixazomib citrate	8000	8	40	-2.34783	nM
3	Oxaliplatin	Ixazomib citrate	0	16	4.01	0	nM
3	Oxaliplatin	Ixazomib citrate	1000	16	-12.31	-14.643	nM
3	Oxaliplatin	Ixazomib citrate	2000	16	-0.93	-4.51795	nM
3	Oxaliplatin	Ixazomib citrate	4000	16	32.31	14.3014	nM
3	Oxaliplatin	Ixazomib citrate	8000	16	37.58	-5.07943	nM
3	Oxaliplatin	Ixazomib citrate	0	32	10.38	0	nM
3	Oxaliplatin	Ixazomib citrate	1000	32	-3.95	-14.643	nM
3	Oxaliplatin	Ixazomib citrate	2000	32	5.4	-4.51795	nM
3	Oxaliplatin	Ixazomib citrate	4000	32	31.74	13.658	nM
3	Oxaliplatin	Ixazomib citrate	8000	32	39.26	-3.18311	nM
3	Oxaliplatin	Ixazomib citrate	0	64	64.43	0	nM
3	Oxaliplatin	Ixazomib citrate	1000	64	58.46	-12.6179	nM
3	Oxaliplatin	Ixazomib citrate	2000	64	61.97	-4.59072	nM
3	Oxaliplatin	Ixazomib citrate	4000	64	68.18	0.501865	nM
3	Oxaliplatin	Ixazomib citrate	8000	64	75.34	-1.58599	nM
4	Oxaliplatin	VR-23	0	0	0	0	nM
4	Oxaliplatin	VR-23	1000	0	8.41	0	nM
4	Oxaliplatin	VR-23	2000	0	22.26	0	nM
4	Oxaliplatin	VR-23	4000	0	36.89	0	nM
4	Oxaliplatin	VR-23	8000	0	44.16	0	nM
4	Oxaliplatin	VR-23	0	625	11.15	0	nM
4	Oxaliplatin	VR-23	1000	625	4.26	-1.95448	nM
4	Oxaliplatin	VR-23	2000	625	22.79	-1.09181	nM
4	Oxaliplatin	VR-23	4000	625	31.12	-7.72829	nM
4	Oxaliplatin	VR-23	8000	625	45.19	-0.0677318	nM
4	Oxaliplatin	VR-23	0	1250	13.59	0	nM
4	Oxaliplatin	VR-23	1000	1250	6.77	-4.647	nM
4	Oxaliplatin	VR-23	2000	1250	22.74	-3.45679	nM
4	Oxaliplatin	VR-23	4000	1250	28.92	-12.0311	nM
4	Oxaliplatin	VR-23	8000	1250	35.76	-12.1328	nM
4	Oxaliplatin	VR-23	0	2500	13.76	0	nM
4	Oxaliplatin	VR-23	1000	2500	4.93	-4.8346	nM
4	Oxaliplatin	VR-23	2000	2500	22.8	-3.55151	nM
4	Oxaliplatin	VR-23	4000	2500	35.38	-5.03317	nM
4	Oxaliplatin	VR-23	8000	2500	37.36	-10.4828	nM
4	Oxaliplatin	VR-23	0	5000	41.84	0	nM
4	Oxaliplatin	VR-23	1000	5000	37.49	-4.8002	nM
4	Oxaliplatin	VR-23	2000	5000	39.09	-12.1572	nM
4	Oxaliplatin	VR-23	4000	5000	38.6	-23.0591	nM
4	Oxaliplatin	VR-23	8000	5000	44.53	-21.6641	nM
5	Oxaliplatin	Oprozomib	0	0	0	0	nM
5	Oxaliplatin	Oprozomib	1000	0	12.4	0	nM
5	Oxaliplatin	Oprozomib	2000	0	18.63	0	nM
5	Oxaliplatin	Oprozomib	4000	0	29.72	0	nM
5	Oxaliplatin	Oprozomib	8000	0	39.68	0	nM
5	Oxaliplatin	Oprozomib	0	2.5	3.81	0	nM
5	Oxaliplatin	Oprozomib	1000	2.5	-8	-4.11014	nM
5	Oxaliplatin	Oprozomib	2000	2.5	-0.35	-10.9297	nM
5	Oxaliplatin	Oprozomib	4000	2.5	28.89	-0.908545	nM
5	Oxaliplatin	Oprozomib	8000	2.5	33.96	-6.2613	nM
5	Oxaliplatin	Oprozomib	0	5	9.43	0	nM
5	Oxaliplatin	Oprozomib	1000	5	-11.77	-4.93391	nM
5	Oxaliplatin	Oprozomib	2000	5	-0.48	-11.6949	nM
5	Oxaliplatin	Oprozomib	4000	5	31.88	1.70351	nM
5	Oxaliplatin	Oprozomib	8000	5	28.77	-12.5097	nM
5	Oxaliplatin	Oprozomib	0	10	6.34	0	nM
5	Oxaliplatin	Oprozomib	1000	10	-5.56	-4.11014	nM
5	Oxaliplatin	Oprozomib	2000	10	6.74	-10.9297	nM
5	Oxaliplatin	Oprozomib	4000	10	28.82	-0.98517	nM
5	Oxaliplatin	Oprozomib	8000	10	33.59	-6.66632	nM
5	Oxaliplatin	Oprozomib	0	20	26.88	0	nM
5	Oxaliplatin	Oprozomib	1000	20	29.37	-0.564102	nM
5	Oxaliplatin	Oprozomib	2000	20	28.75	-6.70112	nM
5	Oxaliplatin	Oprozomib	4000	20	30.3	-14.7208	nM
5	Oxaliplatin	Oprozomib	8000	20	38.98	-13.9458	nM
6	5-Fluorouracil	VR-23	0	0	0	0	nM
6	5-Fluorouracil	VR-23	4000	0	22.02	0	nM
6	5-Fluorouracil	VR-23	8000	0	26.89	0	nM
6	5-Fluorouracil	VR-23	16000	0	29.7	0	nM
6	5-Fluorouracil	VR-23	32000	0	39.61	0	nM
6	5-Fluorouracil	VR-23	0	625	-0.85	0	nM
6	5-Fluorouracil	VR-23	4000	625	7.63	-13.102	nM
6	5-Fluorouracil	VR-23	8000	625	21.85	-5.61639	nM
6	5-Fluorouracil	VR-23	16000	625	27.14	-2.85277	nM
6	5-Fluorouracil	VR-23	32000	625	43.14	3.9337	nM
6	5-Fluorouracil	VR-23	0	1250	7.03	0	nM
6	5-Fluorouracil	VR-23	4000	1250	8.16	-13.102	nM
6	5-Fluorouracil	VR-23	8000	1250	21.25	-6.28501	nM
6	5-Fluorouracil	VR-23	16000	1250	27.12	-2.87506	nM
6	5-Fluorouracil	VR-23	32000	1250	43.91	4.79176	nM
6	5-Fluorouracil	VR-23	0	2500	13.26	0	nM
6	5-Fluorouracil	VR-23	4000	2500	5.94	-16.0045	nM
6	5-Fluorouracil	VR-23	8000	2500	21.58	-8.63853	nM
6	5-Fluorouracil	VR-23	16000	2500	32.15	0.113516	nM
6	5-Fluorouracil	VR-23	32000	2500	40.58	-1.16688	nM
6	5-Fluorouracil	VR-23	0	5000	33.26	0	nM
6	5-Fluorouracil	VR-23	4000	5000	31.57	-11.6276	nM
6	5-Fluorouracil	VR-23	8000	5000	36.5	-10.1699	nM
6	5-Fluorouracil	VR-23	16000	5000	28.45	-21.4694	nM
6	5-Fluorouracil	VR-23	32000	5000	43.09	-13.3683	nM
7	5-Fluorouracil	Oprozomib	0	0	0	0	nM
7	5-Fluorouracil	Oprozomib	4000	0	18.51	0	nM
7	5-Fluorouracil	Oprozomib	8000	0	24.38	0	nM
7	5-Fluorouracil	Oprozomib	16000	0	27.48	0	nM
7	5-Fluorouracil	Oprozomib	32000	0	37.29	0	nM
7	5-Fluorouracil	Oprozomib	0	2.5	19.69	0	nM
7	5-Fluorouracil	Oprozomib	4000	2.5	11.17	-11.1404	nM
7	5-Fluorouracil	Oprozomib	8000	2.5	26.66	-2.99994	nM
7	5-Fluorouracil	Oprozomib	16000	2.5	28.68	-4.02651	nM
7	5-Fluorouracil	Oprozomib	32000	2.5	39.03	-2.66345	nM
7	5-Fluorouracil	Oprozomib	0	5	8.1	0	nM
7	5-Fluorouracil	Oprozomib	4000	5	11.31	-5.04465	nM
7	5-Fluorouracil	Oprozomib	8000	5	27.88	4.07834	nM
7	5-Fluorouracil	Oprozomib	16000	5	25.66	-2.12074	nM
7	5-Fluorouracil	Oprozomib	32000	5	33.09	-4.894	nM
7	5-Fluorouracil	Oprozomib	0	10	17.1	0	nM
7	5-Fluorouracil	Oprozomib	4000	10	11.31	-8.27472	nM
7	5-Fluorouracil	Oprozomib	8000	10	23.73	-3.7548	nM
7	5-Fluorouracil	Oprozomib	16000	10	23.64	-7.34903	nM
7	5-Fluorouracil	Oprozomib	32000	10	31.51	-9.22075	nM
7	5-Fluorouracil	Oprozomib	0	20	28.39	0	nM
7	5-Fluorouracil	Oprozomib	4000	20	16.12	-18.5069	nM
7	5-Fluorouracil	Oprozomib	8000	20	22.64	-16.617	nM
7	5-Fluorouracil	Oprozomib	16000	20	34.73	-5.54339	nM
7	5-Fluorouracil	Oprozomib	32000	20	39.31	-9.74493	nM
8	Cisplatin	Delanzomib	0	0	0	0	nM
8	Cisplatin	Delanzomib	500	0	17.56	0	nM
8	Cisplatin	Delanzomib	1000	0	27.83	0	nM
8	Cisplatin	Delanzomib	2000	0	37.88	0	nM
8	Cisplatin	Delanzomib	4000	0	64.01	0	nM
8	Cisplatin	Delanzomib	0	2.5	5.72	0	nM
8	Cisplatin	Delanzomib	500	2.5	14.71	-3.22257	nM
8	Cisplatin	Delanzomib	1000	2.5	35.61	8.79704	nM
8	Cisplatin	Delanzomib	2000	2.5	36.1	-2.01269	nM
8	Cisplatin	Delanzomib	4000	2.5	66.59	2.91727	nM
8	Cisplatin	Delanzomib	0	5	13.46	0	nM
8	Cisplatin	Delanzomib	500	5	10.04	-8.7844	nM
8	Cisplatin	Delanzomib	1000	5	28.79	-0.666574	nM
8	Cisplatin	Delanzomib	2000	5	32.54	-7.54616	nM
8	Cisplatin	Delanzomib	4000	5	66.33	1.74955	nM
8	Cisplatin	Delanzomib	0	10	16.81	0	nM
8	Cisplatin	Delanzomib	500	10	9.43	-12.3154	nM
8	Cisplatin	Delanzomib	1000	10	27.96	-4.6962	nM
8	Cisplatin	Delanzomib	2000	10	32.99	-9.698	nM
8	Cisplatin	Delanzomib	4000	10	63.7	-2.76574	nM
8	Cisplatin	Delanzomib	0	20	38.94	0	nM
8	Cisplatin	Delanzomib	500	20	31.71	-12.8583	nM
8	Cisplatin	Delanzomib	1000	20	32.66	-19.8016	nM
8	Cisplatin	Delanzomib	2000	20	32.68	-27.6248	nM
8	Cisplatin	Delanzomib	4000	20	59.97	-17.1664	nM
9	Cisplatin	Paclitaxel	0	0	0	0	nM
9	Cisplatin	Paclitaxel	500	0	29.83	0	nM
9	Cisplatin	Paclitaxel	1000	0	25.26	0	nM
9	Cisplatin	Paclitaxel	2000	0	38.14	0	nM
9	Cisplatin	Paclitaxel	4000	0	62.14	0	nM
9	Cisplatin	Paclitaxel	0	2.5	37.73	0	nM
9	Cisplatin	Paclitaxel	500	2.5	22.87	-23.0539	nM
9	Cisplatin	Paclitaxel	1000	2.5	24.79	-17.8479	nM
9	Cisplatin	Paclitaxel	2000	2.5	42.03	-9.09385	nM
9	Cisplatin	Paclitaxel	4000	2.5	66.2	-3.33733	nM
9	Cisplatin	Paclitaxel	0	5	52.09	0	nM
9	Cisplatin	Paclitaxel	500	5	35.51	-26.378	nM
9	Cisplatin	Paclitaxel	1000	5	34.95	-23.2655	nM
9	Cisplatin	Paclitaxel	2000	5	43.59	-22.6667	nM
9	Cisplatin	Paclitaxel	4000	5	64.84	-14.716	nM
9	Cisplatin	Paclitaxel	0	10	53.19	0	nM
9	Cisplatin	Paclitaxel	500	10	44.62	-15.6481	nM
9	Cisplatin	Paclitaxel	1000	10	46	-10.0497	nM
9	Cisplatin	Paclitaxel	2000	10	44.51	-22.6441	nM
9	Cisplatin	Paclitaxel	4000	10	63.68	-16.9888	nM
9	Cisplatin	Paclitaxel	0	20	59.13	0	nM
9	Cisplatin	Paclitaxel	500	20	55.5	-8.55004	nM
9	Cisplatin	Paclitaxel	1000	20	56.77	-3.57563	nM
9	Cisplatin	Paclitaxel	2000	20	56.22	-13.5754	nM
9	Cisplatin	Paclitaxel	4000	20	66.7	-16.9414	nM
10	Cisplatin	5-Fluorouracil	0	0	0	0	nM
10	Cisplatin	5-Fluorouracil	500	0	26.91	0	nM
10	Cisplatin	5-Fluorouracil	1000	0	33.61	0	nM
10	Cisplatin	5-Fluorouracil	2000	0	36.66	0	nM
10	Cisplatin	5-Fluorouracil	4000	0	61.67	0	nM
10	Cisplatin	5-Fluorouracil	0	4000	11.96	0	nM
10	Cisplatin	5-Fluorouracil	500	4000	18.03	-10.6993	nM
10	Cisplatin	5-Fluorouracil	1000	4000	24.97	-10.4101	nM
10	Cisplatin	5-Fluorouracil	2000	4000	39.56	3.49414	nM
10	Cisplatin	5-Fluorouracil	4000	4000	56.54	-6.18101	nM
10	Cisplatin	5-Fluorouracil	0	8000	27.6	0	nM
10	Cisplatin	5-Fluorouracil	500	8000	21.97	-17.1953	nM
10	Cisplatin	5-Fluorouracil	1000	8000	28.84	-15.9598	nM
10	Cisplatin	5-Fluorouracil	2000	8000	37.93	-8.21317	nM
10	Cisplatin	5-Fluorouracil	4000	8000	55.09	-13.8242	nM
10	Cisplatin	5-Fluorouracil	0	16000	38.16	0	nM
10	Cisplatin	5-Fluorouracil	500	16000	38.14	-8.91728	nM
10	Cisplatin	5-Fluorouracil	1000	16000	35.13	-18.5589	nM
10	Cisplatin	5-Fluorouracil	2000	16000	39.04	-16.5859	nM
10	Cisplatin	5-Fluorouracil	4000	16000	60.01	-13.7723	nM
10	Cisplatin	5-Fluorouracil	0	32000	44.17	0	nM
10	Cisplatin	5-Fluorouracil	500	32000	36.71	-17.0173	nM
10	Cisplatin	5-Fluorouracil	1000	32000	41.79	-16.3268	nM
10	Cisplatin	5-Fluorouracil	2000	32000	44.23	-15.859	nM
10	Cisplatin	5-Fluorouracil	4000	32000	64.85	-11.285	nM
11	Anlotinib	Bortezomibl	0	0	0	0	nM
11	Anlotinib	Bortezomibl	1000	0	9.93	0	nM
11	Anlotinib	Bortezomibl	2000	0	19.9	0	nM
11	Anlotinib	Bortezomibl	4000	0	46.95	0	nM
11	Anlotinib	Bortezomibl	8000	0	64.32	0	nM
11	Anlotinib	Bortezomibl	0	1.25	8.1	0	nM
11	Anlotinib	Bortezomibl	1000	1.25	6.53	-3.38072	nM
11	Anlotinib	Bortezomibl	2000	1.25	14.78	-6.14725	nM
11	Anlotinib	Bortezomibl	4000	1.25	46	-1.4341	nM
11	Anlotinib	Bortezomibl	8000	1.25	68.51	4.25265	nM
11	Anlotinib	Bortezomibl	0	2.5	4.2	0	nM
11	Anlotinib	Bortezomibl	1000	2.5	9.6	-0.356532	nM
11	Anlotinib	Bortezomibl	2000	2.5	11.93	-8.61078	nM
11	Anlotinib	Bortezomibl	4000	2.5	45.49	-1.57738	nM
11	Anlotinib	Bortezomibl	8000	2.5	67.03	2.92788	nM
11	Anlotinib	Bortezomibl	0	5	49.69	0	nM
11	Anlotinib	Bortezomibl	1000	5	51.39	0.375353	nM
11	Anlotinib	Bortezomibl	2000	5	52.98	-3.76169	nM
11	Anlotinib	Bortezomibl	4000	5	53.71	-18.8581	nM
11	Anlotinib	Bortezomibl	8000	5	68.71	-12.8526	nM
11	Anlotinib	Bortezomibl	0	10	68.39	0	nM
11	Anlotinib	Bortezomibl	1000	10	66.56	-2.89529	nM
11	Anlotinib	Bortezomibl	2000	10	67.67	-5.37469	nM
11	Anlotinib	Bortezomibl	4000	10	69.85	-13.0001	nM
11	Anlotinib	Bortezomibl	8000	10	73.91	-15.0227	nM
12	Anlotinib	Carfilzomib	0	0	0	0	nM
12	Anlotinib	Carfilzomib	1000	0	13.19	0	nM
12	Anlotinib	Carfilzomib	2000	0	22.08	0	nM
12	Anlotinib	Carfilzomib	4000	0	42.52	0	nM
12	Anlotinib	Carfilzomib	8000	0	64.39	0	nM
12	Anlotinib	Carfilzomib	0	1.25	10.65	0	nM
12	Anlotinib	Carfilzomib	1000	1.25	12.38	-0.906553	nM
12	Anlotinib	Carfilzomib	2000	1.25	14.9	-8.03587	nM
12	Anlotinib	Carfilzomib	4000	1.25	53.49	12.2776	nM
12	Anlotinib	Carfilzomib	8000	1.25	68.74	4.86853	nM
12	Anlotinib	Carfilzomib	0	2.5	18.58	0	nM
12	Anlotinib	Carfilzomib	1000	2.5	79.67	65.7821	nM
12	Anlotinib	Carfilzomib	2000	2.5	25.56	-3.84456	nM
12	Anlotinib	Carfilzomib	4000	2.5	51.61	4.46436	nM
12	Anlotinib	Carfilzomib	8000	2.5	67.37	-0.201733	nM
12	Anlotinib	Carfilzomib	0	5	46.74	0	nM
12	Anlotinib	Carfilzomib	1000	5	81.04	36.6945	nM
12	Anlotinib	Carfilzomib	2000	5	60.66	7.95426	nM
12	Anlotinib	Carfilzomib	4000	5	68.69	3.30508	nM
12	Anlotinib	Carfilzomib	8000	5	77.24	-1.71613	nM
12	Anlotinib	Carfilzomib	0	10	80.24	0	nM
12	Anlotinib	Carfilzomib	1000	10	76.47	-4.84793	nM
12	Anlotinib	Carfilzomib	2000	10	80.62	-2.40367	nM
12	Anlotinib	Carfilzomib	4000	10	83.31	-4.45225	nM
12	Anlotinib	Carfilzomib	8000	10	86.47	-6.32875	nM
Abbreviations: conc, concentration.
