# Supplementary material
Source: Research Square preprint supplement (doi:10.21203/rs.3.rs-8958728/v1)
Supplement: Supplementary file 4 [file c7123fa7798342e68a16c652.xlsx]

## Sheet: Sheet1
Table S1: A catalog of 1600 FDA approved drugs, including their molecular weight (M.W.), product code and storage solution concentration.
number	drug	M.W.	Product code	Storage solution concentration (mM)
1	Ferrous fumarate	169.9	141-01-5	80
2	Etamsylate	263.31	2624-44-4	40
3	Sodium Nitroprusside	261.92	14402-89-2	40
4	Salicylamide	137.14	65-45-2	80
5	Acetylsalicylic acid	180.16	50-78-2	40
6	Methylene Blue trihydrate	373.9	7220-79-3	20
7	Atenolol	266.343	29122-68-7	40
8	Phenytoin sodium	274.25	630-93-3	40
9	Flubendazole	313.29	31430-15-6	40
10	LEUKERIN	152.18	50-44-2	80
11	Phenethyl alcohol	122.16	60-12-8	80
12	Cinchonine	294.39	118-10-5	40
13	cis-Anethol	148.2	104-46-1	80
14	MEPHENESIN	182.22	59-47-2	40
15	MEXENONE	242.28	1641-17-4	40
16	Phenolphthalein	318.33	77-09-8	40
17	Procainamide hydrochloride	271.79	614-39-1	40
18	Betaine hydrochloride	153.61	590-46-5	80
19	SODIUM AMINOSALICYLA	211.15	6018-19-5	40
20	VANATONE	150.17	70-70-2	80
21	Taurine	125.15	107-35-7	40
22	Valethamate bromide	386.37	90-22-2	20
23	Primidone	218.26	125-33-7	40
24	Haloperidol	375.8744	52-86-8	20
25	Sulfalen	280.3	152-47-6	40
26	OCTISALATE	250.34	118-60-5	40
27	PROCAINE	236.32	59-46-1	40
28	BUPIVACAINE HYDROCHLORIDE	324.89	18010-40-7	40
29	DL-XYLOSE	150.13	25990-60-7	80
30	Miltefosine	407.58	58066-85-6	20
31	Cortisone acetate	402.49	50-04-4	40
32	DIENESTROL	266.34	84-17-3	40
33	Enoxolone	470.68	471-53-4	20
34	Halazone	270.0922	80-13-7	40
35	Doxapram hydrochloride monohydrate	432.99	7081-53-0	20
36	Dapoxetine hydrochloride	305.4134	119356-77-3	40
37	Quinestrol	364.53	152-43-2	20
38	Cresol	108.14	1319-77-3	80
39	Xylometazoline hydrochloride	280.84	1218-35-5	40
40	Oxethazaine	467.64	126-27-2	40
41	Heptaminol HCl	181.71	543-15-7	40
42	Arsenic oxide (3)	197.84	1327-53-3	40
43	Brucin	394.46	357-57-3	20
44	CORVOTONE	178.23	59-26-7	40
45	Azlocillin sodium	483.47	37091-65-9	20
46	4-Aminoantipyrine	203.24	83-07-8	40
47	Urethane	89.09	51-79-6	80
48	STRYCHNINE	334.41	57-24-9	40
49	HYDROXYZINE PAMOATE	763.27	10246-75-0	20
50	Disulfiram	296.54	97-77-8	100
51	OXELADIN CITRATE	527.60	52432-72-1	20
52	Anovigam	165.19	938-73-8	80
53	DIPHENYLPYRALINE HCL	317.85	132-18-3	40
54	Streptomycin sulfate	1457.38	3810-74-0	10
55	CLOFIBRIC ACID	214.65	882-09-7	40
56	Folic acid	441.4	59-30-3	40
57	Isoleucin	131.17	73-32-5	40
58	Adenine	135.13	73-24-5	40
59	ACETAMINOPHEN	151.16	103-90-2	80
60	Dichlorophen	269.13	97-23-4	40
61	OXINIACIC ACID	139.11165	2398-81-4	40
62	FLUPHENAZINE HYDROCHLORIDE	510.44	146-56-5	20
63	Uracil	112.09	66-22-8	80
64	Pentoxifylline	278.31	6493-05-6	40
65	Homosalate	262.35	118-56-9	40
66	Adiphenine hydrochloride	347.88	50-42-0	40
67	OCTYLDIMETHOXYCINNAMATE	290.40	5466-77-3	40
68	Chlorprothixene	315.86	113-59-7	40
69	Nicorandil	211.18	65141-46-0	40
70	Paliperidone	426.48	144598-75-4	40
71	Dantrolene sodium salt	336.23	14663-23-1	10
72	Lapatinib	581.06	231277-92-2	40
73	Stanozolol	328.49	10418-03-8	40
74	TRAPIDIL	205.26	15421-84-8	40
75	Lafutidine	431.55	118288-08-7	20
76	Domperidone	425.92	57808-66-9	20
77	Eplerenone	414.49	107724-20-9	20
78	Moclobemide	268.74	71320-77-9	40
79	Galanthamine hydrobromide	368.27	1953-04-4	40
80	Sulfacetamide sodium	254.2	6209-17-2	40
81	Urapidil hydrochloride	423.94	64887-14-5	40
82	Cetirizine hydrochloride	461.81	83881-52-1	20
83	Moroxydine hydrochloride	207.66	3160-91-6	20
84	Alfuzosin hydrochloride	425.91	81403-68-1	10
85	Antazoline hydrochloride	301.82	2508-72-7	40
86	Sorafenib tosylate	637.03	475207-59-1	20
87	Budesonide	430.54	51333-22-3	20
88	Vardenafil hydrochloride trihydrate	579.11	224785-90-4	10
89	IPRATROPIUM BROMIDE	430.38	66985-17-9	20
90	Tolterodine tartrate	475.58	124937-52-6	20
91	Atazanavir sulfate	802.93	229975-97-7	20
92	Doxazosin mesylate	547.58	77883-43-3	10
93	Naloxone hydrochloride	363.84	357-08-4	40
94	Dipivefrin hydrochloride	387.9	64019-93-8	20
95	Carbachol	182.65	51-83-2	40
96	Methazolamide	236.27	554-57-4	40
97	Halcinonide	454.96	3093-35-4	20
98	Bumetanide	364.41	28395-03-1	40
99	Molsidomine	242.23	25717-80-0	40
100	Zalcitabine	211.22	7481-89-2	40
101	Solifenacin succinate	480.56	242478-38-2	20
102	Dilthiazem hydrochloride	450.98	33286-22-5	20
103	Mebhydrolin napadisylate	420.52	6153-33-9	40
104	TRICHLORMETHIAZIDE	380.66	133-67-5	40
105	Balofloxacin	389.42	127294-70-6	20
106	Mizolastine	432.49	108612-45-9	20
107	Voriconazole	349.31	137234-62-9	40
108	Bengenin	328.27	477-90-7	40
109	Sulfanilamide	172.2	63-74-1	40
110	SelaMeerin	769.96	165108-07-6	10
111	Epirubicin hydrochloride	579.9802	56390-09-1	20
112	DIAZOXIDE	230.67	364-98-7	40
113	Glimepiride	490.62	93479-97-1	40
114	VIGABATRIN	129.16	60643-86-9	40
115	PHYSOSTIGMINE SALICYLATE	413.4776	57-64-7	20
116	Cepharanthine	606.72521	481-49-2	20
117	Etoposide	588.56	33419-42-0	20
118	Cefdinir	395.41	91832-40-5	40
119	Imiquimod	240.3104	99011-02-6	40
120	Estradiol valerate	356.5097	979-32-8	40
121	CITICOLINE	488.32	987-78-0	40
122	Mirtazapine	265.35	85650-52-8	40
123	Cefpiramide acid	612.64	70797-11-4	20
124	Toremifene	405.96	89778-26-7	40
125	Cephalonium	458.51826	5575-21-3	10
126	Brinzolamide	383.51	138890-62-7	20
127	Bisoprolol fumarate	441.52	104344-23-2	20
128	Ftaxilide	269.295	19368-18-4	40
129	Felodipine	384.2624	72509-76-3	20
130	Vagistat	387.71	65899-73-2	40
131	Clemastine fumarate	459.9746	14976-57-9	40
132	Calcium folinate	511.5131	1492-18-8	40
133	pheneticillin	364.34	147-55-7	40
134	efloxate	324.33	119-41-5	40
135	Bosutinib	530.45	380843-75-4	20
136	Nebivolol hydrochloride	441.9	152520-56-4	20
137	Argatroban	508.63	74863-84-6	20
138	Rocuronium bromide	609.68	119302-91-9	20
139	Roxatidine acetate hydrochloride	384.9	93793-83-0	40
140	Mitoxantrone hydrochloride	517.4	70476-82-3	20
141	Pranoprofen	255.27576	52549-17-4	40
142	Anagrelide	256.09	68475-42-3	40
143	PantoprazoleSodiumSesquihydrate	383.3765	164579-32-2	40
144	QUETIAPIN	383.51	111974-69-7	40
145	Nisoldipine	388.41	63675-72-9	40
146	Oxaliplatin	397.29	61825-94-3	40
147	URAPIDIL	387.48	34661-75-1	40
148	Pancuronium bromide	732.67	15500-66-0	20
149	Vinpocetine	350.45	42971-09-5	40
150	Depofemin	396.575	313-06-4	40
151	Fosfomycin calcium	176.12	26472-47-9	40
152	NORETHYNODREL	298.42	68-23-5	40
153	Maprotiline hydrochloride	313.86	10347-81-6	40
154	Cyproheptadine hydrochloride	323.8692	41354-29-4	40
155	Aloin	418.39	5133-19-7	40
156	HOMATROPINE HYDROBROMIDE	356.2626	51-56-9	40
157	TICAGRELOR	522.57	274693-27-5	20
158	Benazepril hydrochloride	460.95	86541-74-4	20
159	Loteprednol etabonate	466.95	82034-46-6	20
160	Clopidogrel	307.8	113665-84-2	40
161	Pramiracetam	269.38	68497-62-1	40
162	Fenoprofen calcium	558.63	53746-45-5	20
163	Escitalopram	414.43	128196-01-0	20
164	Docetaxel trihydrate	861.9462	148408-66-6	20
165	Amorolfine hydrochloride	353.97	78613-38-4	40
166	Fluticasone propionate	500.57	80474-14-2	20
167	PEMETREXED ACID	389.4144	137281-23-3	20
168	Vinorelbine	778.93	71486-22-1	20
169	Linagliptin	472.54	668270-12-0	10
170	Levetiracetam	170.21	102767-28-2	40
171	Manidipine hydrochloride	683.621	89226-75-5	10
172	Chloroquine diphosphate	515.87	50-63-5	40
173	SECNIDAZOLE	185.18402	3366-95-8	40
174	Diciofenac	296.149	15307-86-5	40
175	TERAZOSIN HCL	423.89	63074-08-8	40
176	Sodium ceftiofur	545.54	104010-37-9	20
177	CEPHRADINE	349.4115	38821-53-3	40
178	THIOOCTIC ACID	206.33	1077-28-7	40
179	Meptazinol hydrochloride	269.81	59263-76-2	40
180	Sumatriptan succinate	413.49	103628-48-4	40
181	PROTRIPTYLINE HYDROCHLORIDE	299.84	1225-55-4	40
182	Brompheniramine hydrogen maleate	435.31	980-71-2	20
183	Zopiclone	388.81	43200-80-2	40
184	Ranolazine dihydrochloride	500.46	95635-56-6	20
185	Prednisolone phosphate sodium	484.39	125-02-0	40
186	Loperamide hydrochloride	513.5125	34552-83-5	20
187	Tamsulosin hydrochloride	444.97	106463-17-6	20
188	Azelastine	381.9	58581-89-8	20
189	Seratrodast	354.44	112665-43-7	40
190	Thalidomide	258.23	50-35-1	40
191	Pioglitazone	356.44	111025-46-8	40
192	Eletriptan hydrobromide	382.51904	177834-92-3	40
193	Levodropropizine	236.31	99291-25-5	40
194	Bipariden	311.46106	514-65-8	40
195	VALDECOXIB	314.36	181695-72-7	40
196	Foscarnet sodium	191.95	63585-09-1	40
197	THIOPROLINE	133.16989	444-27-9	40
198	Proparacaine hydrochloride	330.86	5875-06-9	40
199	Meropenem	383.46	96036-03-2	40
200	Pizotifen Malate	429.53	5189-11-7	40
201	Betaxolol hydrochloride	343.89	63659-19-8	40
202	Bromisoval	223.07	496-67-3	40
203	Rivastigmine	250.34	123441-03-2	40
204	Prasugrel	373.44	150322-43-3	40
205	AMLODIPINE BESYLATE	567.05	111470-99-6	20
206	TILETAMINE HYDROCHLORIDE	259.799	14176-50-2	40
207	ETHAMIVAN	223.27	304-84-7	40
208	Methicillin sodium	402.4046	132-92-3	20
209	AZATADINE MALEATE	522.55	3978-86-7	20
210	Lonidamine	321.16515	50264-69-2	40
211	trimetozine	281.306	635-41-6	40
212	SULFANILYLUREA	215.23208	547-44-4	40
213	Sitagliptin	407.32	486460-32-6	40
214	Vanitiolide	253.32	17692-71-6	40
215	Tilorone dihydrochloride	483.47	27591-69-1	40
216	Mycophenolate mofetil	433.50	115007-34-6	20
217	Betahistine dihydrochloride	209.12	5579-84-0	40
218	Acarbose	645.6	56180-94-0	20
219	Clorprenaline hydrochloride	250.16	6933-90-0	40
220	Acecainide	277.36	32795-44-1	40
221	CIPROFLOXACIN HYDROCHLORIDE	367.8	93107-08-5	40
222	Gemcitabine	263.198	95058-81-4	40
223	Oxymetazoline hydrochloride	296.84	2315-02-8	40
224	METHSCOPOLAMINE BROMIDE	398.29	155-41-9	40
225	Probucol	516.84	23288-49-5	20
226	Clomipramine hydrochloride	351.31	17321-77-6	40
227	LITHIUM CITRATE TETRAHYDRATE	281.98	6080-58-6	40
228	MECLOFENAMATE SODIUM	318.1371	6385-02-0	40
229	AMCINONIDE	502.57	51022-69-6	20
230	Dextromethorphan hydrobromide monohydrate	370.32	6700-34-1	40
231	Chloropyramine hydrochloride	326.26	6170-42-9	40
232	ZOMEPIRAC SODIUM SALT	313.71	64092-48-4	40
233	MERBROMIN	750.65	129-16-8	40
234	QUINIDINE HYDROCHLORIDE	378.89	6151-40-2	40
235	Zonisamide	212.23	68291-97-4	40
236	LOBELINE HYDROCHLORIDE	382.93	134-63-4	20
237	DICHLORISONE ACETATE	455.4	79-61-8	40
238	HYDROCORTISONE BUTYRATE	432.55	13609-67-1	40
239	IODIPAMIDE	1139.76	606-17-7	10
240	Nilutamide	317.22	63612-50-0	40
241	MEFEXAMIDE HYDROCHLORIDE	316.82	1227-61-8	40
242	CINOXACIN	262.22	28657-80-9	0.02
243	METICRANE	275.34	1084-65-7	40
244	HYDROCORTISONE VALERATE	446.58	57524-89-7	40
245	Orciprenaline sulfate	260.3	5874-97-5	40
246	Escin	1131.28427	6805-41-0	40
247	Metaraminol bitartrate	317.29	33402-03-8	40
248	SPIPERONE	395.47	749-02-0	40
249	MECLOCYCLINE SULFOSALICYLATE SALT	695.05	73816-42-9	40
250	TRIMETHADIONE	143.14	127-48-0	0.08
251	Sulfogaiacol	242.29	1321-14-8	0.02
252	ISOXICAM	335.34	34552-84-6	40
253	BEPHENIUM HYDROXYNAPHTHOATE	443.53	3818-50-6	40
254	Tizanidine hydrochloride	290.17	64461-82-1	40
255	Flurbiprofen	244.26	5104-49-4	40
256	Orbifloxacin	395.38	113617-63-3	40
257	METYRAPONE	226.27	54-36-4	40
258	Methylprodnisolone Sodium Succinate	496.53	2375-03-3	40
259	DIGITOXIN	764.94	71-63-6	40
260	Clofarabine	303.6823	123318-82-1	40
261	Dimenhydrinate	469.96	523-87-5	40
262	LACTITOL MONOHYDRATE	362.33	81025-04-9	40
263	Paragyline	159.23	555-57-7	40
264	Ethisterone	312.45	434-03-7	0.02
265	TRIFLUPROMAZINE HYDROCHLORIDE	388.88	1098-60-8	40
266	NITARSONE	247.04	98-72-6	40
267	Methylthiouracil	142.18	56-04-2	0.08
268	ERYTHROSINE	879.86	16423-68-0	40
269	Undecenoic acid	184.28	112-38-9	40
270	TYLOXAPOL	137.17904	25301-02-4	0.08
271	ETIDRONIC ACID	206.03	2809-21-4	40
272	Ipriflavone	280.32	35212-22-7	40
273	Actarit	193.2	18699-02-0	40
274	BLUTENE CHLORIDE	305.83	92-31-9	40
275	Antascarin	194.27	136-77-6	40
276	BufloMedil Hydrochloride	343.85	35543-24-9	0.02
277	Ataractan	267.36	115-46-8	40
278	SUXIBUZONE	438.47	27470-51-5	40
279	Colchicine	399.44	64-86-8	40
280	INDOPROFEN	281.31	31842-01-0	40
281	ISOXSUPRINE HYDROCHLORIDE	337.84	579-56-6	40
282	DL-Glutamine	146.15	6899-04-3	40
283	FENDILINE HYDROCHLORIDE	351.91	13636-18-5	40
284	Hexetidine	339.6129	141-94-6	40
285	Diethanol sulfide	122.1871	111-48-8	0.08
286	Benadril hydrochloride	291.824	147-24-0	40
287	Moxifloxacin hydrochloride	437.89	186826-86-8	40
288	D-Sorbitol	182.17488	50-70-4	40
289	Aniracetam	219.24	72432-10-1	40
290	Rosiglitazone	357.43	122320-73-4	40
291	Sodium salicylate	160.1059	54-21-7	40
292	BENZALKONIUM CHLORIDE	283.88	8001-54-5	40
293	Prednisolone-21-acetate	402.48	52-21-1	40
294	MINAPRINE DIHYDROCHLORIDE	371.3	25905-77-5	40
295	Resorcin monoacetate	152.15	102-29-4	0.08
296	Bisoctrizole	658.37	103597-45-1	40
297	Dimethyl sulfoxide	78.13	67-68-5	0.1
298	CARVEDILOL PHOSPHATE	522.488	610309-89-2	40
299	NIMODIPINE	418.44	66085-59-4	40
300	Estropipate	436.56	7280-37-7	40
301	Phenol Red	354.38	143-74-8	40
302	Labetalol hydrochloride	364.87	32780-64-6	40
303	Riluzole	234.2	1744-22-5	40
304	Pregabalin	159.23	148553-50-8	40
305	Risperidal	410.48	106266-06-2	40
306	OSALMID	229.23	526-18-1	40
307	Canrenone	340.46	976-71-6	40
308	valpramide	143.23	2430-27-5	0.08
309	Potassium iodide	166.01	7681-11-0	40
310	Ticlopidine hydrochloride	300.25	53885-35-1	40
311	MORANTEL TARTRATE SALT	370.42	26155-31-7	40
312	Thioridazine hydrochloride	407.0437	130-61-0	0.02
313	CEFADROXIL	363.39	50370-12-2	40
314	Fluocinolone acetonide	452.49	67-73-2	40
315	Cinepazide maleate	533.57	26328-04-1	40
316	ethaverine hydrochloride	431.9640	985-13-7	40
317	Pheniramine maleate	356.42	132-20-7	40
318	Gliquidone	527.63	33342-05-1	40
319	Gabexate mesylate	417.48	56974-61-9	40
320	Erlotinib	393.44	183321-74-6	40
321	SUNITINIB MALATE	532.56	341031-54-7	20
322	Atropine	289.37	51-55-8	40
323	Crotamiton	203.28	483-63-6	40
324	Clofazimine	473.4	2030-63-9	0.02
325	Oxybuprocaine hydrochloride	344.88	5987-82-6	40
326	RISEDRONIC ACID	283.11	105462-24-6	40
327	Bicalutamide	430.37	90357-06-5	40
328	Amodiaquin dihydrochloride dihydrate	464.82	6398-98-7	0.02
329	Fenspiride HCl	296.79	5053-08-7	40
330	Estradiol benzoate	376.49	50-50-0	40
331	PROCHLORPERAZINE MALEATE	606.09	84-02-6	40
332	Ropivacaine hydrochloride	310.86	98717-15-8	40
333	Cilnidipine	492.53	132203-70-4	40
334	Dabigatran etexilate	627.73	211915-06-9	40
335	Linezolid	337.35	165800-03-3	40
336	Artemisinin	282.33	63968-64-9	40
337	Anastrozole	293.37	120511-73-1	40
338	MOXISYLYTE HYDROCHLORIDE	315.84	964-52-3	0.02
339	PYRANTEL TARTRATE SALT	356.39	33401-94-4	40
340	Pipemidic acid	303.32329	51940-44-4	40
341	Tetryzoline	200.28	84-22-0	40
342	Birch-Me	152.15	119-36-8	0.08
343	Nitroxoline	190.16	4008-48-4	40
344	Benzethonium chloride	448.0943	121-54-0	40
345	Octocrilene	361.48	6197-30-4	40
346	Antepan	86.14	110-85-0	0.08
347	HYDROXYQUINOLINE	145.16	148-24-3	0.08
348	Hexamethylenetetramine	140.19	100-97-0	40
349	Acetanilide	135.16	103-84-4	0.08
350	MONOPYRAZOLONE	174.2	89-25-8	40
351	Dehydrocholic acid	402.52	81-23-2	40
352	Modafinil	273.35	68693-11-8	40
353	Calcium gluconate	430.37	299-28-5	0.02
354	Idebenone	338.44795	58186-27-9	40
355	D-Mannitol	182.17	69-65-8	40
356	Guanidine hydrochloride	95.53	50-01-1	0.08
357	Sodium gluconate	218.1402	527-07-1	40
358	Armodafinil	273.3563	112111-43-0	40
359	Testosterone propionate	344.49	57-85-2	40
360	PENTETIC ACID	393.3535	67-43-6	0.02
361	Inositol	180.1589	87-89-8	40
362	Talc	379.27	14807-96-6	0.02
363	Ethylenediaminetetraacetic acid trisodium salt solution	394.22	150-38-9	0.02
364	BISMUTH SUBSALICYLATE	362.09	14882-18-9	40
365	Pefloxacin	333.36	70458-92-3	40
366	Piracetam	142.1588	7491-74-9	0.08
367	Alverine citrate	473.5714	5560-59-8	40
368	Glucosamine	179.17	3416-24-8	40
369	N,N-methylenebis N'-1-(hydroxymethyl)-2,5-dioxo-4-imidazolidinyl urea	388.3	39236-46-9	40
370	Sulfacetamide sodium	236.22	127-56-0	40
371	Diclofenac diethylamine	369.29	78213-16-8	40
372	Artesunate	384.42	88495-63-0	40
373	dicurone	176.12	32449-92-6	40
374	SULFINPYRAZONE	404.48	57-96-5	40
375	Acexamic Acid	173.21365	57-08-9	40
376	Inosine	268.23	58-63-9	40
377	PROFLAVINE HEMISULFATE	516.57	1811-28-5	0.02
378	L-Tryptophan	204.23	73-22-3	40
379	Oxcarbazepine	252.27	28721-07-5	40
380	Pasiniazid	290.28093	2066-89-9	40
381	SALICOSIDE	286.28	138-52-3	40
382	Naphazoline hydrochloride	246.74	550-99-2	40
383	Carvedilol	406.47	72956-09-3	40
384	DEXIBUPROFEN	206.28	51146-56-6	40
385	Menadione	172.18	58-27-5	40
386	Fluoxetine	345.79	54910-89-3	40
387	Minoxidil	209.25	38304-91-5	40
388	Dropropizine	236.31	17692-31-8	40
389	Phenylephrine hydrochloride	203.67	61-76-7	40
390	Clozapine	326.82	5786-21-0	40
391	CINCHOPHEN	249.26	132-60-5	40
392	Probenecid	285.36	57-66-9	40
393	Indometacin	357.79	53-86-1	40
394	Sulindac	356.41	38194-50-2	40
395	Pramoxine hydrochloride	329.86	637-58-1	40
396	Berberine hydrochloride	371.8	633-65-8	40
397	Cilostazol	369.46	73963-72-1	40
398	Loxoprofen	246.3	68767-14-6	40
399	CARBETAPENTANE CITRATE	525.59	23142-01-0	40
400	Celecoxib	381.37	169590-42-5	40
401	Sildenafil citrate	666.7	171599-83-0	0.01
402	Nefopam hydrochloride	289.8	23327-57-3	40
403	Decoquinate	417.54	18507-89-6	0.02
404	Venlafaxine hydrochloride	313.86	99300-78-4	40
405	Arbutin	272.25	497-76-7	40
406	Erythromycin ethylsuccinate	862.05	1264-62-6	40
407	TIMOLOL MALEATE	432.4993	26921-17-5	40
408	Abbolactone	416.57	52-01-7	40
409	Zileuton	236.29	111406-87-2	40
410	Progesterone	314.47	57-83-0	40
411	CYTISINE	190.24703	485-35-8	40
412	Doxofylline	266.26	69975-86-6	40
413	Azilsartan kaMedoxoMil	606.63	863031-24-7	0.02
414	Sertraline hydrochloride	342.69	79559-97-0	40
415	Sotalol hydrochloride	308.82	959-24-0	40
416	Deracoxib	381.37	169590-41-4	40
417	DEFLAZACORT	441.5289	14484-47-0	40
418	Irinotecan hydrochloride trihydrate	677.18	136572-09-3	40
419	Metoprolol tartrate	684.81	56392-17-7	40
420	Finasteride	372.55	98319-26-7	40
421	Flutamide	276.21	13311-84-7	40
422	CHLORPROPAMIDE	276.74	94-20-2	40
423	Ethyl vanillin	166.17	121-32-4	40
424	Dimethyl fumarate	144.13	624-49-7	0.08
425	TYROSINE	181.19	60-18-4	40
426	Tetramisole hydrochloride	240.75	5086-74-8	40
427	Creatinine	113.12	60-27-5	40
428	lauroseptol	364.45729	57-09-0	0.02
429	Sasapyrine	258.23	552-94-3	40
430	Oxybenzone	228.24	131-57-7	40
431	Capitrol	214.05	773-76-2	40
432	Leucobasal	124.14	150-76-5	0.08
433	Meglumine	195.21	6284-40-8	40
434	CYCLANDELATE	276.38	456-59-7	40
435	Methyldopa	211.21	555-30-6	0.02
436	Clotrimazole	344.84	23593-75-1	0.02
437	L-Pyroglutamic acid	129.11	98-79-3	40
438	DERMOFONGIN	179.6	130-16-5	40
439	Sulfaguanidine	214.24735	57-67-0	40
440	Tolperisone hydrochloride	281.82	3644-61-9	40
441	Phthalylsulfathiazole	403.43	85-73-4	40
442	IODOQUINOL	396.9551	83-73-8	0.02
443	PHENYLINDIONE	222.2458	83-12-5	40
444	Pancreatin	N/A	8049-47-6	40
445	Metacycline hydrochloride	478.88	3963-95-9	0.02
446	EUQUININE	396.48	83-75-0	40
447	Lenvatinib	426.85	417716-92-8	20
448	Thimerosal	404.81	54-64-8	40
449	Diammonium Glycyrrhizinate	856.997	79165-06-3	40
450	Sodium tauroglycocholate	594.74	41945-48-6	0.02
451	DIHYDROERGOTAMINE MESYLATE	679.7986	6190-39-2	40
452	Flopropione	182.17765	2295-58-1	40
453	2-Amino-5-nitrobenzophenone	242.23	1775-95-7	40
454	6-METHOXY-2-NAPHTHOIC ACID	202.21	2471-70-7	40
455	Dibenzosuberone	208.26	1210-35-1	40
456	Maltose	342.3	69-79-4	40
457	Maltitol	344.31	585-88-6	0.02
458	Lactose	342.3	63-42-3	40
459	Xylitol	152.15	87-99-0	0.08
460	10,11-DIHYDROCARBAMAZEPINE	238.29	3564-73-6	40
461	Acridine	179.22	260-94-6	40
462	1,2-Diphenylhydrazine	184.24	122-66-7	40
463	Dihydroartemisinin	284.35	71939-50-9	40
464	AZOBENZENE	182.22	103-33-3	40
465	2-Vinylpyridine	105.14	100-69-6	0.08
466	Dibutyl phthalate	278.34	84-74-2	40
467	4-Isopropylphenol	136.19	99-89-8	0.08
468	Theobromine	180.16	83-67-0	40
469	URIC ACID	168.11	69-93-2	40
470	beta-Alanine	89.09	107-95-9	40
471	Iminodibenzyl	195.26	494-19-9	40
472	5-Aminosalicylic acid	153.14	89-57-6	0.08
473	Tryptamine	160.22	61-54-1	0.08
474	4-Aminophenol	109.13	123-30-8	0.08
475	Salicylic acid	138.12	69-72-7	0.08
476	2,6-Dimethylaniline	121.18	87-62-7	0.08
477	Chloramine-T	227.65	127-65-1	40
478	arginine monohydrochloride	210.66	1119-34-2	40
479	2-Naphthol	144.17	135-19-3	0.08
480	Pravastatin sodium	447.52	81131-70-6	40
481	Hydroquinone	110.11	123-31-9	40
482	Lansoprazole	369.36	103577-45-3	20
483	Topiramate	339.36	97240-79-4	40
484	Hydroxyurea	76.05523	127-07-1	80
485	Chlorothiazide	295.7246	58-94-6	40
486	Amitriptyline hydrochloride	313.86	549-18-8	40
487	Ketoconazole	531.43	65277-42-1	40
488	Lamotrigine	256.09	84057-84-1	40
489	Rifampicin	822.94	13292-46-1	20
490	Lamivudine	229.26	134678-17-4	40
491	Ribavirin	244.2	36791-04-5	40
492	Retinyl acetate	328.49914	127-47-9	40
493	Orlistat	495.73	96829-58-2	20
494	Simvastatin	418.57	79902-63-9	20
495	Ganciclovir	255.23	82410-32-0	20
496	D-PHENYLALANINE	165.19352	673-06-3	40
497	Quinine	324.42	130-95-0	40
498	SULISOBENZONE	308.3121	4065-45-6	40
499	Allopurinol	136.1138	315-30-0	80
500	Niflumic acid	282.22408	4394-00-7	40
501	PRANLUKAST	481.5	103177-37-3	20
502	Avobenzone	310.39	70356-09-1	40
503	Naftopidil dihydrochloride	392.49	57149-07-2	40
504	Aspartame	294.3	22839-47-0	40
505	Cyasorb	244.2493	131-53-3	40
506	Sulfamonomethoxine	280.3073	1220-83-3	40
507	Ursodeoxycholic acid	392.57	128-13-2	20
508	Gabapentin hydrochloride	207.7	60142-96-3	0.02
509	Flavoxate hydrochloride	427.92	3717-88-2	40
510	TRIFLUSAL	248.16	322-79-2	40
511	Lisinopril	405.49	83915-83-7	40
512	Cyclophosphamide monohydrate	279.1049	6055-19-2	40
513	Oxaprozin	293.32	21256-18-8	40
514	Pimaricin	665.73	7681-93-8	10
515	L-CYCLOSERINE	102.09	339-72-0	40
516	Niclosamide	327.12	50-65-7	40
517	SULOCTIDIL	337.56	54767-75-8	40
518	Oxfendazole	315.35	53716-50-0	20
519	Chlormezanone	273.73	80-77-3	40
520	MOLINDONE HYDROCHLORIDE	312.84	15622-65-8	40
521	ENOXACIN SESQUIHYDRATE	320.32	84294-96-2	40
522	Brivudine	333.14	69304-47-8	40
523	TETRABENAZINE	317.42	58-46-8	20
524	Gallamine triethiodide	891.53	65-29-2	10
525	Benzidamine hydrochloride	345.87	132-69-4	40
526	Piperonyl butoxide	338.44	51-03-6	40
527	ETHOSUXIMIDE	141.17	77-67-8	40
528	Benzyl benzoate	212.24	120-51-4	40
529	Triacetin	218.20	102-76-1	40
530	Delphene	191.27	134-62-3	40
531	Benzyl alcohol	108.14	100-51-6	80
532	4-Chlorophenol	128.56	106-48-9	40
533	Antipyrine	188.23	60-80-0	40
534	Pindolol	248.32	13523-86-9	20
535	Roxarsone	263.04	121-19-7	40
536	L-Ornithine	132.16	70-26-8	40
537	Urea	60.06	57-13-6	40
538	Guaifenesin	198.2207	93-14-1	40
539	haurymellin	165.63	1115-70-4	40
540	Sulfamethazine	278.335	57-68-1	40
541	Papaverine hydrochloride	375.85	61-25-6	10
542	DL-CARNITINE	161.2	461-06-3	20
543	Zinc undecylenate	431.92	557-08-4	40
544	Disodium monofluorophosphate	143.95	10163-15-2	40
545	Orotic acid	156.1	65-86-1	40
546	Sulfathiazole	255.32	72-14-0	40
547	Sulfameter	280.31	651-06-9	40
548	colistatin	355.3937	116-43-8	40
549	Sulfisoxazole	267.3086	127-69-5	40
550	Furazolidone	225.1621	67-45-8	40
551	L-Ascorbyl 6-palmitate	414.53	137-66-6	20
552	SULFAMETHIZOLE	270.33	144-82-1	40
553	Carbaglu	190.15	1188-38-1	40
554	Ethoxyquin	217.31	91-53-2	40
555	Omeprazole	345.42	73590-58-6	40
556	Piroxicam	331.3526	36322-90-4	20
557	MONOBENZONE	200.23	103-16-2	40
558	Cholesterol	386.65	57-88-5	40
559	trans-Anethole	148.2	4180-23-8	80
560	Diolane	118.17	107-41-5	40
561	Benzoyl peroxide	242.23	94-36-0	40
562	4-Methylpyrazole	82.1	7554-65-6	40
563	Promazine hydrochloride	320.88	53-60-1	40
564	Sulfapyridine	249.2932	144-83-2	40
565	OXOLAMINE CITRATE	437.44	1949-20-8	40
566	Aceglutamide	188.18469	2490-97-3	40
567	Carbadox	262.22	6804-07-5	10
568	CASANTHRANOL	396.576	8024-48-4	40
569	Troxerutin	346.5	7085-55-4	40
570	Febuxostat	316.37	144060-53-7	40
571	Aptal	142.58	59-50-7	80
572	Coumarin	146.14	91-64-5	80
573	Phenothiazine	199.27	92-84-2	40
574	Tilmicosin	869.13	108050-54-0	40
575	Phenacetin	179.22	62-44-2	40
576	Chloral hydrate	165.4	302-17-0	80
577	Mestinon	261.12	101-26-8	40
578	DITHIOPROPANOL	124.22	59-52-9	80
579	BENZTHIAZIDE	431.9415	91-33-8	20
580	Mianserin hydrochloride	300.83	21535-47-7	20
581	TOLFENAMIC ACID	261.7	13710-19-5	40
582	DEXCHLORPHENIRAMINE MALEATE	390.86	2438-32-6	40
583	Clidinium bromide	432.35	3485-62-9	40
584	Butylated hydroxyanisole	180.249	25013-16-5	40
585	SPECTINOMYCIN DIHYDROCHLORIDE	405.27	21736-83-4	40
586	Carbaryl	201.22	63-25-2	40
587	Reserpine	608.68	50-55-5	20
588	Kanamycin sulfate	582.58	25389-94-0	40
589	MEPENZOLATE BROMIDE	420.34	76-90-4	40
590	Rutin	610.52	153-18-4	40
591	Propitocaine hydrochloride	256.77	1786-81-8	40
592	Cimetidine	252.34	51481-61-9	40
593	Triamcinolone	394.4441	124-94-7	40
594	Lactulose	342.3	4618-18-2	40
595	Antrapurol	240.2175	117-10-2	20
596	Glycerite	1701.2	1401-55-4	20
597	Procaine hydrochloride	272.77	51-05-8	40
598	Acetrizoic acid	556.86	85-36-9	40
599	(+)-Pilocarpine hydrochloride	244.72	54-71-7	40
600	Quinapril hydrochloride	474.98	82586-55-8	40
601	Flunarizine dihydrochloride	477.42	30484-77-6	40
602	Diflunisal	250.2	22494-42-4	40
603	DICUMAROL	336.29	66-76-2	40
604	Ethambutol dihydrochloride	277.2369	1070-11-7	40
605	Amisulpride	369.48644	71675-85-9	40
606	Propranolol hydrochloride	295.8122	318-98-9	40
607	Acetazolamide	222.25	59-66-5	40
608	ACETOHEXAMIDE	324.4	968-81-0	40
609	4-Aminopyridine	94.11	504-24-5	40
610	Spiramycin	843.07	8025-81-8	40
611	Triamcinolone acetonide	434.5	76-25-5	40
612	IPRONIAZID PHOSPHATE	277.21	305-33-9	40
613	Cianidanol	290.27	154-23-4	40
614	THIOCTAMIDE	205.34	3206-73-3	40
615	nonoxynol	616.8402	26027-38-3	40
616	Meloxicam	351.4	71125-38-7	40
617	Cefsulodine sodium	554.52	52152-93-9	10
618	Bromhexine hydrochloride	412.59	611-75-6	40
619	ETOFYLLINE	224.22	519-37-9	40
620	Bithionol	356.04	97-18-7	40
621	Potassium antimonyl tartrate sesquihydrate	667.87	28300-74-5	40
622	Vancomycin hydrochloride	1485.71	1404-93-9	40
623	Benzoic acid	122.12	65-85-0	80
624	Ethylparaben	166.17	120-47-8	80
625	Tamoxifen citrate	563.6536	54965-24-1	20
626	Sulfadoxine	310.3338	2447-57-6	40
627	Furosemide	330.74	54-31-9	40
628	Ketoprofen	254.28	22071-15-4	40
629	Methimazole	114.17	60-56-0	80
630	Bezafibrate	361.82	41859-67-0	40
631	Testosterone	288.42	58-22-0	40
632	ADEMINE	253.26	396-01-0	40
633	Sulfamethoxypyridazine	280.3	80-35-3	40
634	Cyromazine	166.18	66215-27-8	80
635	L(-)-Carnitine	161.2	541-15-1	40
636	Chenodeoxycholic acid	392.57	474-25-9	40
637	Levodopa	197.19	59-92-7	40
638	Pyrimethamine	248.71	58-14-0	40
639	Primaquine diphosphate	455.34	63-45-6	40
640	Carbazochrome sodium sulfonate	376.32	51460-26-5	40
641	Adenosine	267.24	58-61-7	40
642	LINDANE	290.83	58-89-9	40
643	(R)-NAPROXEN	230.259	23979-41-1	40
644	Dehydroepiandrosterone acetate	330.46	853-23-6	40
645	Flufenamic acid	281.23	530-78-9	40
646	Fenbufen	254.28	36330-85-5	40
647	Mefloquine hydrochloride	414.77	51773-92-3	40
648	Tylosin tartrate	1052.16	74610-55-2	20
649	Difenidol hydrochloride	345.906	3254-89-5	40
650	DENDRID	354.099	54-42-2	40
651	L-Thyroxine	776.87	51-48-9	40
652	Noctone	350.86	66357-59-3	40
653	Propafenone	341.44	54063-53-5	40
654	Bufexamac	223.27419	2438-72-4	40
655	Cefepime hydrochloride	571.5	123171-59-5	20
656	Atomoxetine hydrochloride	291.82	82248-59-7	40
657	Altrenogest	310.43	850-52-2	40
658	Noradrenaline bitartrate	337.28	69815-49-2	40
659	Dinitolmide	225.16	148-01-6	40
660	DIMETRIDAZOLE	141.13	551-92-8	80
661	MERCAPTURIC ACID	163.19	616-91-1	80
662	Clioquinol	305.5	130-26-7	40
663	Gallic acid	170.12	149-91-7	80
664	Diosmin	608.54	520-27-4	20
665	Nicotinic acid	123.11	59-67-6	80
666	Bronidiol	199.99	52-51-7	40
667	6-Aminocaproic acid	131.176	60-32-2	10
668	D-CAMPHOR	152.2384	464-49-3	80
669	Behenic alcohol	326.6	661-19-8	40
670	Sulfamethoxazole	253.28	723-46-6	40
671	D(+)-Glucose	180.16	50-99-7	40
672	4-Biphenylacetic acid	212.24	5728-52-9	40
673	Saccharin	183.18	81-07-2	40
674	Mefenamic acid	241.29	61-68-7	40
675	SULPHADIONE	248.3	80-08-0	40
676	Diprophylline	254.2475	479-18-5	40
677	Tinidazole	247.27	19387-91-8	40
678	Thiamine hydrochloride	337.27	67-03-8	40
679	Oxytetracycline	460.44	79-57-2	40
680	Furacilin	198.14	59-87-0	40
681	Ayrtol	156.61	88-04-0	80
682	Dehydroacetic acid	168.15	520-45-6	40
683	Cetylpyridinium chloride monohydrate	358	6004-24-6	40
684	Chlorobutanol	186.46	57-15-8	40
685	Ofloxacin	361.37	82419-36-1	10
686	Stugeron	368.51	298-57-7	10
687	PHENYLMERCURIC ACETATE	336.74	62-38-4	40
688	PYRITHIOXIN	368.47	1098-97-1	10
689	Salicylazosulfapyridine	398.39	599-79-1	40
690	Chloquinan	228.07	72-80-0	40
691	TERPIN MONOHYDRATE	190.285	2451-01-6	40
692	Cefotaxime sodium	477.44	64485-93-4	40
693	Sulfamerazine	264.3	127-79-7	40
694	TMTD	240.43	137-26-8	40
695	Butyl 4-aminobenzoate	193.24	94-25-7	40
696	Sulfaquinoxaline sodium	322.32	967-80-6	40
697	TRIMEBUTINE	387.47	39133-31-8	40
698	BENFLUOREX HYDROCHLORIDE	387.82	23642-66-2	40
699	Ambroxol	378.1	18683-91-5	40
700	Sulfabenzamide	276.31	127-71-9	40
701	Busulfan	246.3029	55-98-1	40
702	Benzocaine	165.19	94-09-7	40
703	Allantoin	158.12	97-59-6	40
704	Azelaic acid	188.22	123-99-9	40
705	Butylparaben	194.23	94-26-8	40
706	L(+)-Ascorbic acid	176.12	50-81-7	80
707	Docusate sodium	444.56	577-11-7	40
708	Sulfadiazine	250.28	68-35-9	40
709	Resorcine	110.11	108-46-3	80
710	Cefixime	453.45	79350-37-1	40
711	delta-Gluconolactone	178.14	90-80-2	40
712	Nicotinamide	122.12	98-92-0	80
713	BHT FCC/NF	220.35	128-37-0	40
714	Aminophenazone	231.29	58-15-1	40
715	Riboflavin	376.37	83-88-5	10
716	Thiabendazole	201.25	148-79-8	40
717	PHENYTION	252.27	57-41-0	40
718	SUNETTE	201.24	55589-62-3	40
719	Cyclamic acid	179.23	100-88-9	40
720	QUINACRINE DIHYDROCHLORIDE	472.88	69-05-6	40
721	Carbamazepine	236.27	298-46-4	40
722	Levamisole hydrochloride	240.75	16595-80-5	40
723	Cyclosporin A	1202.64	59865-13-3	40
724	Mepivacaine hydrochloride	282.81	1722-62-9	40
725	DEXAMETHASON ACETATE	434.5095	1177-87-3	40
726	Adrenalone hydrochloride	217.65	62-13-5	40
727	Amstat	157.21	1197-18-8	40
728	Neomycin sulfate	908.87	1405-10-3	10
729	Hydroxychloroquine sulfate	433.95	747-36-4	40
730	Carbimazole	186.23395	22232-54-8	40
731	Cefazolin sodium salt	476.48	27164-46-1	40
732	Anestan	197.39	151-67-7	40
733	Oxyclozanide	401.46	2277-92-1	20
734	Abamectin	887.11	71751-41-2	40
735	Isradipine	371.39	75695-93-1	40
736	Penicillin G sodium salt	356.37	69-57-8	40
737	Ethopabate	237.25	59-06-3	40
738	Iopanoic acid	570.93	96-83-3	40
739	Trometamol	121.14	77-86-1	80
740	L-Hyoscyamine	289.3778	101-31-5	40
741	Naltrexone hydrochloride	377.86	16676-29-2	40
742	Floxuridine	246.19	50-91-9	40
743	Histamine	111.15	51-45-6	40
744	Sennoside A	862.74	81-27-6	40
745	Teicoplanin	1709.39	61036-62-2	10
746	Paclitaxel	853.92	33069-62-4	40
747	Doramectin	899.11	117704-25-3	40
748	ANISODAMINE	305.37716	17659-49-3	40
749	Dirithromycin	835.07	62013-04-1	10
750	Isoniazid	137.14	54-85-3	80
751	Pyridoxine	169.18	65-23-6	80
752	Albamycinsodium	634.61	1476-53-5	40
753	Chloroambucil	304.219	305-03-3	40
754	Propoxur	209.24	114-26-1	40
755	MEDRYSONE	344.4985	2668-66-8	40
756	D-Pantethine	554.72	16816-67-4	40
757	Dequalinium chloride	527.5861	522-51-0	20
758	niapyrin	308.34267	2139-47-1	40
759	NOSCAPINE HYDROCHLORIDE	449.88	912-60-7	40
760	(+)-EMETINE DIHYDROCHLORIDE HYDRATE	553.56	7083-71-8	40
761	Adrucil	130.08	51-21-8	80
762	OXACILLIN SODIUM	423.4262	1173-88-2	20
763	Fluorocytosine	129.09	2022-85-7	40
764	Trimetazidine dihydrochloride	339.26	13171-25-0	40
765	DROPERIDOL	379.43	548-73-2	40
766	DESIPRAMINE HYDROCHLORIDE	302.84	58-28-6	40
767	Carbenoxolone disodium	614.72	7421-40-1	40
768	METHOXAMINE HYDROCHLORIDE	247.72	61-16-5	40
769	Ketotifen fumarate	425.5	34580-14-8	40
770	Clorpyrifos	350.59	2921-88-2	40
771	Ethynodiol diacetate	384.51	297-76-7	40
772	Diazinon	304.35057	333-41-5	40
773	Clevidipine butyrate	456.32	167221-71-8	20
774	Chlorhexidine	505.45	55-56-1	40
775	Dicloxacillin sodium	510.32	13412-64-1	40
776	Etodolac	287.35	41340-25-4	40
777	TYLOSIN	916.1	1401-69-0	40
778	Propantheline bromide	448.4045	50-34-0	40
779	Lupetidin	113.2	504-03-0	40
780	Cephalexin	347.39	15686-71-2	40
781	Aquacrine	270.37	53-16-7	40
782	(+/-)-Verapamil hydrochloride	491.06	152-11-4	20
783	Itraconazole	705.63	84625-61-6	40
784	Acebutolol hydrochloride	372.89	34381-68-5	40
785	AMIKACIN	585.6	37517-28-5	40
786	Ergotamine bitartrate	1313.43	379-79-3	40
787	Malathion	330.36	121-75-5	40
788	Combinal E	472.7583	58-95-7	40
789	Prednisone	358.43	53-03-2	40
790	Hexachlorophene	406.9	70-30-4	40
791	R-(+)-Lansoprazole	369.36	138530-94-6	40
792	Cefoxitin sodium	449.43	33564-30-6	40
793	Roflumilast	403.21	162401-32-3	20
794	TRANYLCYPROMINE	169.66	1986-47-6	40
795	Mafenide hydrochloride	222.69	138-37-4	40
796	Moxonidine	241.7	75438-57-2	40
797	Aztreonam	435.43	78110-38-0	20
798	Triprolidine hydrochloride	314.85	6138-79-0	40
799	Cloxacillin sodium	475.88	7081-44-9	40
800	Erythromycin	733.93	114-07-8	40
801	Monensin sodium salt	692.85	22373-78-0	40
802	Docetaxel	807.88	114977-28-5	20
803	Netilmicin sulfate	720.78	56391-57-2	40
804	Fludarabine	285.23	21679-14-1	20
805	Choline chloride	139.6264	67-48-1	80
806	Cyanocobalamin	1355.37	68-19-9	10
807	Sodium risedronate	305.09	115436-72-1	40
808	Granisetron hydrochloride	348.87	107007-99-8	40
809	salifungin	403.21	3679-64-9	20
810	Clopidol	192.04	2971-90-6	10
811	TRIMIPRAMINE MALEATE SALT	410.51	521-78-8	40
812	Mexiletine hydrochloride	215.72	5370-01-4	40
813	Epinephrine bitartrate	333.2977	51-42-3	40
814	Estradiol	272.38	50-28-2	40
815	Oxybutynin hydrochloride	393.9582	1508-65-2	40
816	Prazosin hydrochloride	419.86	19237-84-4	40
817	Tretinoin	300.44	302-79-4	20
818	Proglumide	334.4189	6620-60-6	40
819	Mebeverine hydrochloride	466.01	2753-45-9	40
820	TOLBUTAMIDE	270.35	64-77-7	40
821	IFOSFAMIDE	261.09	3778-73-2	40
822	Isoprenaline hydrochloride	247.724	51-30-9	40
823	Azilsartan	456.46	147403-03-0	20
824	Carboplatin	371.25	41575-94-4	40
825	Retinol palmitate	524.86	79-81-2	40
826	Flumequine	261.25	42835-25-6	40
827	Toltrazuril	425.38	69004-03-1	20
828	Capsaicin	305.41	404-86-4	40
829	Ticarcillin disodium salt	428.39	4697-14-7	40
830	L-NORADRENALINE BITARTRATE	337.28	108341-18-0	40
831	Baclofen	213.66	1134-47-0	10
832	Ketanserin	395.43	74050-98-9	40
833	Amphotericin B	924.08	1397-89-3	40
834	ANTHRALIN	226.23	1143-38-0	40
835	METOCLOPRAMIDE HCL	336.26	7232-21-5	40
836	Cefmetazole sodium	493.52	56796-39-5	40
837	L(-)-Epinephrine	183.2	51-43-4	10
838	DRONEDARONE HYDROCHLORIDE	593.22	141625-93-6	20
839	Carisoprodol	260.3361	78-44-4	40
840	Vitamin K1	450.7111	84-80-0	40
841	Dexamethasone	392.46	50-02-2	40
842	Fluvoxamine maleate	434.41	61718-82-9	20
843	Sulfadimethoxine	310.3338	122-11-2	40
844	Metronidazole	171.1569	443-48-1	40
845	2-AMINOETHANETHIOL	77.15	60-23-1	40
846	Theophylline	180.16	58-55-9	40
847	Apramycin sulfate	637.66	65710-07-8	40
848	Glutathione	307.33	70-18-8	10
849	Vitamin D2	396.65	50-14-6	20
850	Valacyclovir hydrochloride	360.8	124832-27-5	20
851	Repaglinide	452.59	135062-02-1	40
852	Etomidate	244.29	33125-97-2	40
853	PERPHENAZINE	403.97	58-39-9	20
854	Chlortalidone	338.7718	77-36-1	40
855	ZOLMITRIPTANE	287.36	139264-17-8	40
856	Adapalene	412.52	106685-40-9	20
857	Tolnaftate	307.4174	2398-96-1	40
858	Sparfloxacin	392.4	110871-86-8	20
859	Milrinone	211.22	78415-72-2	40
860	Loratadine	382.88	79794-75-5	40
861	Denatonium benzoate	446.58	3734-33-6	40
862	Formestane	302.41	566-48-3	40
863	Polymyxin B sulfate	1301.56	1405-20-5	40
864	MINOCYCLINE HYDROCHLORIDE	493.94	13614-98-7	20
865	Mifepristone	429.6	84371-65-3	20
866	Aminoglutethimide	232.2847	125-84-8	40
867	PAROMOMYCIN SULFATE	713.71	1263-89-4	40
868	Penfluridol	523.97	26864-56-2	20
869	Sarafloxacin hydrochloride	421.83	91296-87-6	40
870	Meclizine dihydrochloride	463.87	1104-22-9	40
871	2-Pyridinealdoxime methochloride	172.61	51-15-0	40
872	Imazalil	297.1865	35554-44-0	40
873	Ciclopirox ethanolamine	268.35	41621-49-2	40
874	Doxylamine succinate	388.46	562-10-7	20
875	Cefprozil hydrate	407.44	121123-17-9	20
876	Rasagiline	171.24	136236-51-6	40
877	Dacarbazine	182.18	4342-03-4	40
878	podofilox	414.41	518-28-5	40
879	Cephalothin	418.4	58-71-9	40
880	(+)-Camptothecin	348.35	7689-03-4	40
881	Flumethasone	410.46	2135-17-3	40
882	Penicillin V potassium salt	388.48	132-98-9	40
883	Beclomethasone dipropionate	521.04	5534-09-8	40
884	OXIRACETAM	158.16	62613-82-5	20
885	Benfotiamine	466.45616	22457-89-2	40
886	GRAMICIDIN	1882.343	1405-97-6	40
887	Ivermectin	875.09	70288-86-7	40
888	Nicergoline	484.39	27848-84-6	40
889	Nimesulide	308.31	51803-78-2	40
890	Vitamin D3	384.64	67-97-0	40
891	Diastase	N/A	9000-92-4	40
892	Clorsulon	380.66	60200-06-8	40
893	TAUROCHOLIC ACID SODIUM SALT HYDRATE	537.68	345909-26-4	40
894	Salbutamol	239.31	18559-94-9	40
895	Doxycycline hydrochloride	480.896	10592-13-9	40
896	Fenbendazole	299.3538	43210-67-9	40
897	Clindamycin phosphate	504.96	24729-96-2	40
898	Carbenicillin disodium	422.36	4800-94-6	40
899	Nifedipine	346.34	21829-25-4	40
900	Chlorhexidine hydrochloride	578.3793	3697-42-5	40
901	Fenofibrate	360.83	49562-28-9	40
902	Bupropion Hydrochloride	276.21	31677-93-7	40
903	Roxithromycin	837.05	80214-83-1	40
904	Albendazole	265.33	54965-21-8	40
905	Trimethoprim	290.32	738-70-5	40
906	Rifaximin	785.88	80621-81-4	40
907	Mebendazole	295.3	31431-39-7	20
908	PALONOSETRON HYDROCHLORIDE	332.87	135729-62-3	40
909	Moxidectin	639.8369	113507-06-5	40
910	Phenoxybenzamine hydrochloride	340.2961	63-92-3	40
911	Leflunomide	270.21	75706-12-6	40
912	Fusidine	516.7246	6990-06-3	40
913	Protionamide	180.27339	14222-60-7	40
914	Acipimox	154.12632	51037-30-0	80
915	Betamethasone 17-valerate	476.5907	2152-44-5	40
916	Sildenafil	474.58	139755-83-2	20
917	Ethinamide	166.2463	536-33-4	80
918	Imexon	111.1	59643-91-3	40
919	Cyproterone acetate	416.94	427-51-0	40
920	Desonide	416.51	638-94-8	40
921	Olopatadine hydrochloride	373.87	140462-76-6	40
922	Methylprednisolone	374.4814	83-43-2	40
923	Diclazuril	407.64	101831-37-2	20
924	Tropisetron hydrochloride	320.82212	105826-92-4	40
925	Topotecan hydrochloride	457.9178	119413-54-6	20
926	BROMOPRIDE	344.25434	4093-35-0	40
927	Racecadotril	385.48576	81110-73-8	40
928	Sulfaquinoxaline	300.34	59-40-5	40
929	Temozolomide	194.1537	85622-93-1	20
930	Tiotropium bromide	472.42	136310-93-5	40
931	Blonanserin	367.5028032	132810-10-7	40
932	Gefitinib	446.913	184475-35-2	20
933	Propionyl-L-carnitine hydrochloride	211.2194	119793-66-7	40
934	VITAMIN A	286.45	68-26-8	40
935	Rivaroxaban	435.88	366789-02-8	40
936	Rofecoxib	314.36	162011-90-7	40
937	IFENPRODIL HEMITARTRATE	475.53	23210-58-4	40
938	Bifonazole	310.39	60628-96-8	40
939	Mizoribine	259.22	50924-49-7	40
940	TOLEDOMIN	282.81	101152-94-7	40
941	Cefmenoxime hydrochloride	1059.58	75738-58-8	20
942	Analgin	333.34	5907-38-0	40
943	Clomifene citrate	598.0986	50-41-9	40
944	DIGOXIN	780.9588	20830-75-5	10
945	Ractopamine hydrochloride	337.84	90274-24-1	20
946	Iodixanol	1550.18	92339-11-2	20
947	dromostat	503.55421	34140-59-5	40
948	Tetracaine hydrochloride	300.83	136-47-0	40
949	Mitotan	320.04	53-19-0	40
950	Phenothrin	350.45	26002-80-2	40
951	Sulpiride	341.4323	15676-16-1	40
952	NADOLOL	309.4	42200-33-9	40
953	BENDROFLUMETHIAZIDE	421.41	73-48-3	40
954	Chloramphenicol	323.13	56-75-7	40
955	Amsacrine	393.46	51264-14-3	20
956	Lovastatin	404.54	75330-75-5	40
957	Citicoline sodium	510.31	33818-15-4	40
958	Flunixin meglumin	491.46	42461-84-7	40
959	Sodium etidronate	249.99	7414-83-7	40
960	Levosulpiride	341.43	23672-07-3	40
961	Toradol	376.4	74103-07-4	40
962	Piperacillin sodium salt	539.54	59703-84-3	40
963	Ribostamycin sulfate	552.55	53797-35-6	40
964	Nicardipine hydrochloride	515.99	54527-84-3	40
965	Diethylstilbestrol	268.35	56-53-1	40
966	Butenafine hydrochloride	353.19	101827-46-7	40
967	Cefoperazone sodium	667.65	62893-20-3	20
968	SISOMICIN SULFATE	1385.43	53179-09-2	10
969	Acetylcholine chloride	181.66	60-31-1	80
970	Trifluoperazine dihydrochloride	480.4267	440-17-5	40
971	Ceftriaxone sodium	662	104376-79-6	10
972	Cefuroxime sodium	446.37	56238-63-2	20
973	Bacitracin	1422.725	1405-87-4	40
974	Cepazine	510.47	64544-07-6	40
975	Cefonicid sodium	586.53	61270-78-8	40
976	Erdosteine	249.3	84611-23-4	40
977	Pamabrom	348.2	606-04-2	40
978	Pilocarpine nitrate	271.27	148-72-1	40
979	PYRILAMINE MALEATE	401.4664	59-33-6	40
980	Oxolinic acid	261.2363	14698-29-4	20
981	Lincomycin hydrochloride monohydrate	443	7179-49-9	40
982	PENTOLINIUM TARTRATE	538.6	52-62-0	40
983	Azathioprine	277.26	446-86-6	40
984	Flumazenil	303.29	78755-81-4	20
985	Altretamine	210.28	645-05-6	20
986	Hydrocortisone acetate	404.5	50-03-3	40
987	Celiprolol hydrochloride	415.96	57470-78-7	40
988	Colistin sulfate	2801.27	1264-72-8	20
989	Bornyl acetate	196.29	76-49-3	40
990	Clonidine hydrochloride	266.55	4205-91-8	40
991	Triethylenethiophosphoramide	189.22	52-24-4	40
992	PAMBA	151.16	56-91-7	40
993	Chlorophyllin	724.16	11006-34-1	40
994	Tobramycin	467.51	32986-56-4	40
995	Caffeine	194.19	58-08-2	40
996	Ubenimex	308.37	58970-76-6	40
997	Nabumetone	228.29	42924-53-8	40
998	Pyrantel pamoate	594.692	22204-24-6	10
999	Sodium cromoglycate	248.3	15826-37-6	40
1000	farlutin	386.5362	71-58-9	20
1001	Tazobactam acid	300.2949	89786-04-9	40
1002	Levonorgestrel	312.45	797-63-7	40
1003	Ciprofibrate	289.1607	52214-84-3	40
1004	Amrinone	187.2	60719-84-8	40
1005	Terfenadine	471.67	50679-08-8	40
1006	Abacavir	286.34	136470-78-5	40
1007	TRIPELENNAMINE HYDROCHLORIDE	291.82	154-69-8	40
1008	Vincristine sulfate	923.04	2068-78-2	20
1009	Cytarabine	243.22	147-94-4	20
1010	DIACEREIN	368.29	13739-02-1	40
1011	BENZBROMARONE	424.08	3562-84-3	40
1012	Phentolamine mesilate	377.46	65-28-1	40
1013	Lincomycin hydrochloride	443	859-18-7	40
1014	Astemizole	458.58	68844-77-9	40
1015	VILAZODONE	477.993	163521-12-8	20
1016	Nepafenac	254.28	78281-72-8	40
1017	Tropicamide	284.36	1508-75-4	40
1018	CARTEOLOL HYDROCHLORIDE	328.83	51781-21-6	40
1019	Megestrol acetate	384.51	595-33-5	40
1020	Anethole trithione	240.35	532-11-6	40
1021	Vincamine	354.44	1617-90-9	40
1022	Synephrine	167.21	94-07-5	40
1023	Sodium fusidate	538.69	751-94-0	40
1024	Oxiconazole nitrate	492.14	64211-46-7	20
1025	Cisapride	483.97	81098-60-4	40
1026	Tiapride hydrochloride	447.83	51012-33-0	40
1027	GATIFLOXACIN	375.4	112811-59-3	40
1028	Fleroxacin	369.34	79660-72-3	10
1029	Cinene	136.24	138-86-3	80
1030	Aminopar	153.14	65-49-6	40
1031	Eugenol	164.2	97-53-0	80
1032	Clofibrate	242.7	637-07-0	40
1033	Propofol	178.2767	2078-54-8	80
1034	Guaiacol	124.14	90-05-1	80
1035	Auranofin	678.48	34031-32-8	40
1036	Chlortetracycline hydrochloride	515.35	64-72-2	40
1037	CEFTAZIDIME	546.57	72558-82-8	10
1038	Norfloxacin	319.34	70458-96-7	40
1039	Carmofur	257.26687	61422-45-5	40
1040	ORPHENADRINE HYDROCHLORIDE	305.85	341-69-5	40
1041	Propylthiouracil	170.24	51-52-5	80
1042	PARAMINOL	137.14	150-13-0	80
1043	nafcillin sodium	454.47	7177-50-6	40
1044	Nitrofurantoin	238.16	67-20-9	40
1045	Triclosan	289.54	3380-34-5	40
1046	Sodium nitrite	69	7632-00-0	40
1047	Cinchonidine	294.39	485-71-2	40
1048	OUABAIN OCTAHYDRATE	728.77	11018-89-6	40
1049	Diatrizoate sodium	635.9	737-31-5	40
1050	DISOPYRAMIDE	339.47	3737-09-5	40
1051	Nonivamide	293.4	2444-46-4	40
1052	Bendazol	208.26	621-72-7	40
1053	Artemether	298.38	71963-77-4	40
1054	PHOSPHOSERINE	185.07	407-41-0	40
1055	Carprofen	273.71	53716-49-7	40
1056	Gentamycin sulfate	1506.8	1405-41-0	40
1057	NORTRIPTYLINE HYDROCHLORIDE	299.84	894-71-3	40
1058	DL-TRIHEXYPHENIDYL HYDROCHLORIDE	337.93	58947-95-8	40
1059	Chlorophos	257.44	52-68-6	40
1060	Acitretin	326.43	55079-83-9	40
1061	FLAVIN MONONUCLEOTIDE	478.33	130-40-5	10
1062	Permethrin	391.29	52645-53-1	40
1063	TOLAZAMIDE	311.4	1156-19-0	40
1064	Mycophenolic acid	320.34	24280-93-1	40
1065	BENZTROPINE MESYLATE	403.53	132-17-2	40
1066	Pamidronate disodium salt	369.1	57248-88-1	40
1067	Sucralfate	2072.71	54182-58-0	10
1068	mylosar	244.2	320-67-2	40
1069	Leucocrystal Violet	373.53	603-48-5	40
1070	Crystal Violet	407.98	548-62-9	40
1071	L-5-Hydroxytryptophan	220.22	4350-09-8	40
1072	ALODAN	397.77	2550-75-6	40
1073	GRISEOFULVIN	352.77	126-07-8	40
1074	Chlorpromazine hydrochloride	355.32	69-09-0	40
1075	Amlodipine	567.05	88150-42-9	40
1076	Phenazopyridine hydrochloride	249.7	136-40-3	40
1077	Fluconazole	306.27	86386-73-4	40
1078	Dyclonine hydrochloride	325.87	536-43-6	40
1079	Panthenol	205.26	16485-10-2	40
1080	Bilcolic	176.17	90-33-5	40
1081	Fluorescein	332.3156	2321-07-5	40
1082	Sodium butanoate	110.09	156-54-7	40
1083	Ibuprofen	206.28	15687-27-1	40
1084	DIATRIZOIC ACID	613.92	117-96-4	10
1085	Agipnon	155.19	64-65-3	80
1086	SODIUM MONTMORILLONITE	282.209991455078	1318-93-0	40
1087	Cialis	389.4	171596-29-5	10
1088	Sucralose	397.63	56038-13-2	40
1089	Demeclocycline hydrochloride	501.32	64-73-3	20
1090	Meclofenoxate hydrochloride	294.17	3685-84-5	40
1091	Fenofibric acid	318.75	42017-89-0	40
1092	Climbazole	292.76794	38083-17-9	40
1093	Stavudine	224.21	3056-17-5	40
1094	Cefditoren pivoxil	620.72	117467-28-4	40
1095	TRICYCLODECANE HYDROCHLORIDE	187.7147	665-66-7	40
1096	MENTHOL	156.2703	2216-51-5	80
1097	Capecitabine	359.35	154361-50-9	40
1098	Methocarbamol	241.24	532-03-6	40
1099	Torasemide	348.42	56211-40-6	40
1100	Terbutaline	327.89	78628-80-5	40
1101	Loxapine succinate salt	445.9	27833-64-3	40
1102	Pentetrazol	138.1734	54-95-5	80
1103	Mesna	164.18	19767-45-4	80
1104	Gemfibrozil	250.33	25812-30-0	40
1105	Zidovudine	267.24	30516-87-1	40
1106	Chlormethine hydrochloride	192.51	55-86-7	40
1107	Azithromycin dihydrate	749.00	117772-70-0	40
1108	DIETHYLCARBAMAZINE CITRATE	391.42	1642-54-2	40
1109	Aceclofenac	354.18	89796-99-6	40
1110	Nilvadipine	385.38	75530-68-6	40
1111	Ethynyl estradiol	296.41	57-63-6	40
1112	Pemirolast potassium	266.31	100299-08-9	40
1113	Pyrazinamide	123.11	98-96-4	40
1114	Trifluridine	296.2	70-00-8	40
1115	Hydroxyprogesterone	330.47	68-96-2	40
1116	Betamipron	193.20407	3440-28-6	40
1117	Phenylbutazone	308.3835	50-33-9	40
1118	Ritodrine hydrochloride	323.82	23239-51-2	40
1119	Clarithromycin	747.95	81103-11-9	40
1120	Praziquantel	312.4153	55268-74-1	40
1121	4-AMINOHIPPURIC ACID	194.19	61-78-9	40
1122	Dexpanthenol	205.25	81-13-0	40
1123	Butoconazole nitrate	474.79	64872-77-1	20
1124	Lacidipine	455.54	103890-78-4	20
1125	Ethacridine lactate monohydrate	361.4	6402-23-9	40
1126	Capastat sulfate	752.76	1405-37-4	40
1127	Pizotifen	295.44	15574-96-6	40
1128	Memantine hydrochloride	215.763	41100-52-1	40
1129	Lomefloxacin	351.35	98079-51-7	40
1130	AGOMELATINE	243.30098	138112-76-2	40
1131	Bambuterol hydrochloride	403.9099	81732-46-9	20
1132	Dasatinib	488.006	302962-49-8	20
1133	Hydrochlorothiazide	297.7405	58-93-5	40
1134	Amfepramone hydrochloride	241.76	134-80-5	40
1135	LEVOFLOXACIN HCL	397.83	138199-71-0	40
1136	Axitinib	386.47	319460-85-0	20
1137	Phenformin hydrochloride	241.72	834-28-6	40
1138	Acyclovir	225.21	59277-89-3	40
1139	NIALAMIDE	298.34	51-12-7	40
1140	Adriamycin	543.52	23214-92-8	40
1141	Deferasirox	373.36	201530-41-8	40
1142	Epalrestat	319.39	82159-09-9	20
1143	Cisatracurium besylate	1243.48	96946-42-8	20
1144	DICYCLOMINE HYDROCHLORIDE	345.95	67-92-5	40
1145	Candesartan	440.4654	139481-59-7	40
1146	Captopril	217.29	62571-86-2	40
1147	Ramelteon	259.3513	196597-26-9	40
1148	Toremifene citrate	598.08	89778-27-8	40
1149	Mupirocin	500.63518	12650-69-0	40
1150	Nadifloxacin	360.38862	124858-35-1	40
1151	Acemetacin	415.82	53164-05-9	40
1152	Lornoxicam	371.82	70374-39-9	40
1153	Levocetirizine	388.89	130018-77-8	40
1154	FEXOFENADINE HYDROCHLORIDE	538.12	138452-21-8	40
1155	DULOXETINE HCL	333.88	136434-34-9	40
1156	Trospium chloride	873.1006	10405-02-4	10
1157	Trilostane	329.43	13647-35-3	40
1158	Otilonium bromide	563.57	26095-59-0	20
1159	Fesoterodine fumarate	527.65	286930-03-8	20
1160	Pramipexole	211.33	104632-26-0	40
1161	Ondansetron hydrochloride	365.86	103639-04-9	40
1162	Isosorbide dinitrate	236.14	87-33-2	40
1163	Danazol	337.46	17230-88-5	40
1164	Fudosteine	179.23	13189-98-5	40
1165	Ciclopirox	207.27	29342-05-0	40
1166	Citalopram hydrobromide	405.31	59729-32-7	20
1167	Perindoprilat	340.41	95153-31-4	40
1168	Methotrexate	454.44	59-05-2	50
1169	Oseltamivir phosphate	410.4	204255-11-8	40
1170	Fluvastatin sodium salt	433.45	93957-55-2	20
1171	Procarbazine hydrochloride	257.76	366-70-1	40
1172	Fosinopril sodium	586.65	88889-14-9	10
1173	Atovaquone	366.84	95233-18-4	20
1174	Gemifioxacin mesylate	485.49	210353-53-0	20
1175	Alarelin	1167.32	79561-22-1	10
1176	Amiodarone hydrochloride	681.78	19774-82-4	40
1177	Liranaftate	328.43	88678-31-3	40
1178	Indapamide	365.8412	26807-65-8	40
1179	Dutasteride	528.53	164656-23-9	20
1180	XYLAZINE HYDROCHLORIDE	256.79	23076-35-9	40
1181	Rifabutin	847	72559-06-9	20
1182	Vildagliptin	303.4	274901-16-5	40
1183	Esmolol hydrochloride	331.15	81161-17-3	40
1184	Silodosin	495.53	160970-54-7	40
1185	Imipenem	317.36	74431-23-5	40
1186	Vidarabine	267.24	5536-17-4	40
1187	Streptozocin	265.2247	18883-66-4	40
1188	Dacogen	228.21	2353-33-5	40
1189	Cyclobenzaprine hydrochloride	311.858	6202-23-9	40
1190	Rosuvastatin calcium	1001.14	147098-20-2	10
1191	Daunorubicin hydrochloride	563.99	23541-50-6	20
1192	Rizatriptan benzoate	391.47	145202-66-0	40
1193	Norethindrone	298.42	68-22-4	40
1194	Curcumin	368.39	458-37-7	40
1195	Benserazide hydrochloride	293.7	14919-77-8	40
1196	Benicar	558.59	144689-63-4	20
1197	Rimonabant hydrochloride	500.25	158681-13-1	20
1198	Aliskiren hemifumarate	1219.6	173334-58-2	40
1199	Hydroxy Camptothecine	364.35	64439-81-2	40
1200	Iopromide	791.12	73334-07-3	40
1201	Nilotinib	529.52	641571-10-0	20
1202	Ritonavir	720.96	155213-67-5	20
1203	Nifuratel	285.28	4936-47-4	40
1204	Gliclazide	323.41692	21187-98-4	40
1205	Azasetron hydrochloride	386.27	123040-16-4	40
1206	Miglitol	207.22	72432-03-2	40
1207	Mitiglinide calcium	704.91	207844-01-7	10
1208	Mometasone furoate	521.43	83919-23-7	40
1209	Pidotimod	244.27099	121808-62-6	40
1210	Valganciclovir hydrochloride	390.82	175865-59-5	40
1211	Darifenacin hydrobromide	505.44606	133099-07-7	20
1212	SODIUM PHENYLBUTYRATE	186.18	1716-12-7	40
1213	Rapamycin	914.18	53123-88-9	20
1214	Melphalan	305.2066	148-82-3	20
1215	ILOPERIDONE	426.48	133454-47-4	20
1216	Doxepin hydrochloride	315.84	1229-29-4	40
1217	DROSPIRENONE	366.49	67392-87-4	40
1218	Pirenzepine hydrochloride	424.32	29868-97-1	40
1219	Naftifine hydrochloride	323.86	65473-14-5	40
1220	Olsalazine disodium	346.2	6054-98-4	40
1221	Levamlodipine	408.88	103129-82-4	20
1222	8-Methoxypsoralen	216.19	298-81-7	40
1223	Raloxifene hydrochloride	510.04	82640-04-8	20
1224	Thiamphenicol	356.22	15318-45-3	40
1225	Tegaserod maleate	417.46	189188-57-6	20
1226	Itopride hydrochloride	394.9	122892-31-3	40
1227	Chlorpheniramine maleate	390.87	113-92-8	40
1228	Iohexol	821.14	66108-95-0	20
1229	Diclofenac sodium	318.13	15307-79-6	40
1230	Ornidazole	219.63	16773-42-5	40
1231	Acetylspiramycin	885.09	24916-51-6	10
1232	BETAMETHASONE DIPROPIONATE	504.59	5593-20-4	40
1233	Prednisolone	360.44	50-24-8	40
1234	Clobetasol propionate	466.97	25122-46-7	20
1235	Rebamipide	370.79	90098-04-7	40
1236	Nifuroxazide	275.22	965-52-6	40
1237	Cisplatin	300.05	15663-27-1	40
1238	DEFERIDONE	139.15	30652-11-0	40
1239	Aripiprazole	448.39	129722-12-9	20
1240	Olanzapine	312.4398	132539-06-1	40
1241	Amoxapine	313.7896	14028-44-5	40
1242	Tigecycline	585.65	220620-09-7	20
1243	TELMISARTAN	514.62	144701-48-4	10
1244	Estriol	288.3902	50-27-1	40
1245	Dichlorvos	220.98	62-73-7	40
1246	FLUNISOLIDE	434.5	3385-03-3	20
1247	Etoricoxib	358.84	202409-33-4	40
1248	Nizatidine	331.46	76963-41-2	40
1249	Iopamidol	777.09	60166-93-0	40
1250	Midodrine hydrochloride	290.74	3092-17-9	40
1251	PARGYLINE HYDROCHLORIDE	195.69	306-07-0	40
1252	Mestranol	310.43	72-33-3	40
1253	desvenlafaxine	263.38	93413-62-8	40
1254	Picolamine	108.14	3731-52-0	40
1255	Naproxen	230.2659	22204-53-1	40
1256	Vorinostat	264.32	149647-78-9	100
1257	TERBUTALINE SULFATE	274.32	23031-32-5	40
1258	Metolazone	365.83	17560-51-9	40
1259	Tenoxicam	337.37	59804-37-4	40
1260	Exemestane	296.4	107868-30-4	40
1261	D-Cycloserine	102.0935	68-41-7	40
1262	Letrozole	285.3	112809-51-5	40
1263	CYCLOCYTIDINE HCL	261.66	10212-25-6	40
1264	Acetohydroxamic acid	75.07	546-88-3	40
1265	Ezetimibe	410.43	163222-33-1	40
1266	Vecuronium bromide	637.73	50700-72-6	20
1267	Nevirapine	266.3	129618-40-2	40
1268	Chlormadinone acetate	404.93	302-22-7	40
1269	Rimantadine hydrochloride	215.76	1501-84-4	40
1270	Ibandronic acid	319.23	114084-78-5	40
1271	Doxifluridine	246.19	3094-09-5	40
1272	Lomustine	233.6998	13010-47-4	40
1273	valerin	166.2	1069-66-5	40
1274	Glipizide	445.54	29094-61-9	20
1275	TIRATRICOL	621.93	51-24-1	20
1276	Enalapril	376.45001	75847-73-3	20
1277	FASUDIL	291.37449	103745-39-7	40
1278	Bergapten	216.19	484-20-8	40
1279	Metaxalone	221.25	1665-48-1	40
1280	Isotretinoin	300.44	4759-48-2	40
1281	hodostin	334.39	51-60-5	40
1282	Hydralazine hydrochloride	196.6407	304-20-1	40
1283	Hydrocortisone	362.46	50-23-7	40
1284	IRBESARTAN	428.54	138402-11-6	40
1285	Cefotiam hydrochloride	562.08	66309-69-1	40
1286	Enrofloxacin	359.4	93106-60-6	40
1287	Dypyridamole	504.63	58-32-2	40
1288	Trazodone hydrochloride	408.33	25332-39-2	40
1289	Pazufloxacin Mesylate	414.4	163680-77-1	40
1290	Imatinib mesylate	589.71	220127-57-1	20
1291	Rosiglitazone maleate	473.12	155141-29-0	40
1292	Lopinavir	628.8	192725-17-0	40
1293	Neostigmine bromide	303.2	114-80-7	40
1294	Lomefloxacin hydrochloride	387.81	98079-52-8	40
1295	Prostaglandin E1	354.48	745-65-3	40
1296	Famotidine	337.45	76824-35-6	40
1297	Rivastigmine tartrate	400.43	129101-54-8	40
1298	Rifapentine	877.03	61379-65-5	40
1299	Tiopronin	163.19	1953-02-2	80
1300	Sulbactam	233.24	68373-14-8	40
1301	Amitraz	293.41	33089-61-1	40
1302	beta-Carotene	536.87	7235-40-7	40
1303	GLYBURIDE	494.0137	10238-21-8	40
1304	FENCHLORPHOS	321.55	299-84-3	40
1305	Paroxetine hydrochloride	365.83	78246-49-8	40
1306	DEFEROXAMINE MESYLATE	656.79	138-14-7	40
1307	N-Acetylneuraminic acid	309.27	131-48-6	40
1308	Amlexanox	298.29	68302-57-8	40
1309	Ciprofloxacin	331.34	85721-33-1	40
1310	Strontium ranelate	513.49	135459-87-9	20
1311	Lenalidomide	259.26	191732-72-6	40
1312	PENCICLOVIR	253.2628	39809-25-1	40
1313	intropin	189.64	62-31-7	40
1314	Ramipril	416.51	87333-19-5	40
1315	Famciclovir	321.33	104227-87-4	40
1316	RONIDAZOLE	200.15	7681-76-7	40
1317	Vitamin E	430.71	59-02-9	40
1318	Tenofovir	287.21	147127-20-6	40
1319	Chlorzoxazone	169.5684	95-25-0	80
1320	Rebeprazole sodium	381.42	117976-90-6	40
1321	Betamethasone	392.46	378-44-9	40
1322	lyothyronine	650.97	6893-02-3	40
1323	Pentamidine isethionate	592.68	140-64-7	40
1324	Ambrisentan	378.42	177036-94-1	40
1325	Vandetanib	475.31	443913-73-3	40
1326	Varenicline tartrate	361.35	375815-87-5	40
1327	Selenomethionine	196.11	1464-42-2	40
1328	Melatonine	232.28	73-31-4	40
1329	Silibinin	482.44	22888-70-6	40
1330	ALA HCL	167.59335	5451-09-2	80
1331	Daptomycin	1620.68	103060-53-3	40
1332	Fludrocortisone acetate	422.4983	514-36-3	40
1333	Tandutinib	562.7	387867-13-2	40
1334	Vinblastine sulfate	909.06	143-67-9	40
1335	Liothyronine sodium	672.96	55-06-1	20
1336	LANATOSIDE C	985.12	17575-22-3	40
1337	Dimesna	326.34	16208-51-8	40
1338	Acamprosate calcium	400.48	77337-73-6	40
1339	Nateglinide	317.42	105816-04-4	40
1340	Adefovir dipivoxil	501.47	142340-99-6	40
1341	Rosuvastatin	463.52	287714-41-4	40
1342	Montelukast	586.18	158966-92-8	40
1343	Nystatin	926.1	1400-61-9	20
1344	THIOSTREPTON	1664.89	1393-48-2	20
1345	BENZIDAZOL HYDROCHLORIDE	196.6815	59-97-2	40
1346	Aminophylline	420.43	317-34-0	40
1347	METHACHOLINE CHLORIDE	195.69	62-51-1	40
1348	2-Amino-5-chlorobenzophenone	231.68	719-59-5	40
1349	Hematoxylin	302.28	517-28-2	40
1350	biotin	244.31	58-85-5	40
1351	eburnalritardo	294.39	4880-88-0	40
1352	EUCALYPTOL	154.25	470-82-6	80
1353	Chitosan	161.16	9012-76-4	40
1354	2'-DEOXYURIDINE	228.2	951-78-0	40
1355	Lofexidine hydrochloride	295.59	21498-08-8	40
1356	Semicarbazide hydrochloride	111.53	563-41-7	40
1357	Aprepitant	534.43	170729-80-3	40
1358	Torezolid	370.34	856866-72-3	10
1359	Ilaprazole sodium	366.44	172152-50-0	40
1360	EMpagliflozin	450.91	864070-44-0	40
1361	BIBW2992 DiMaleate	718.08	850140-73-7	40
1362	Plerixafor	502.78	110078-46-1	40
1363	Intedanib	539.62	656247-17-5	40
1364	Parecoxib	370.42	198470-84-7	40
1365	Canagliflozin	444.52	842133-18-0	40
1366	Everolimus	958.22	159351-69-6	40
1367	palbociclib	573.66	571190-30-2	20
1368	Daclatasvir, BMS790052	811.8	1009119-65-6	40
1369	Levobupivacaine	288.43	27262-47-1	40
1370	Obeticholic Acid	420.63	459789-99-2	40
1371	Fosaprepitant dimeglumine	1004.83	265121-04-8	40
1372	LDK378, Ceritinib	558.14	1032900-25-6	20
1373	Regorafenib	482.82	755037-03-7	20
1374	Micafungin sodium	1292.26	208538-73-2	40
1375	Carfilzomib	719.91	868540-17-4	40
1376	CP-945598 HCL	546.88	686347-12-6	40
1377	XL184	635.59	1140909-48-3	20
1378	Cancidas	1213.42	179463-17-3	40
1379	PTC124	284.24	775304-57-9	40
1380	Ruxolitinib	306.37	941678-49-5	20
1381	PCI-32765	440.5	936563-96-1	40
1382	Belinostat	318.35	414864-00-9	40
1383	CM 346(Obenoxazine)	307.41	173352-21-1	40
1384	SB939	358.48	929016-96-6	40
1385	CAL101	415.42	870281-82-6	40
1386	NVP-LDE225	485.5	956697-53-3	40
1387	Felbamate	238.24	25451-15-4	40
1388	Nimorazole	226.23	6506-37-2	40
1389	Pimavanserin	427.55	706779-91-1	40
1390	ABT-199 (GDC-0199)	868.44	1257044-40-8	20
1391	MLN2238	361.03	1072833-77-2	20
1392	GSK1120212 Trametinib	615.39	871700-17-3	20
1393	Suramin Sodium Salt	1291.34	129-46-4	20
1394	Gestodene	310.43	60282-87-3	40
1395	SCOPOLAMINE N-OXIDE HYDROBROMIDE	400.26	6106-81-6	40
1396	SCOPOLAMINE HYDROBROMIDE TRIHYDRATE	438.31	6533-68-2	40
1397	Scopolamine butylbromide	440.37	149-64-4	40
1398	THONZONIUM BROMIDE	591.71	553-08-2	40
1399	Epiandrosterone	290.44	481-29-8	40
1400	Myclobutanil	288.78	88671-89-0	40
1401	Hydroxyzine dihydrochloride	447.83	2192-20-3	40
1402	L-Carnitine hydrochloride	197.66	10017-44-4	40
1403	Diaveridine	260.29	5355-16-8	40
1404	Edetol	292.41	102-60-3	40
1405	Adrenosterone	300.4	382-45-6	40
1406	Zinc bacitracin	1486.07	1405-89-6	20
1407	Serotonin hydrochloride	212.68	153-98-0	40
1408	Dihydrostreptomycin sulfate	730.71	5490-27-7	40
1409	Terconazole	532.46	67915-31-5	40
1410	Entacapone	305.29	130929-57-6	40
1411	CARBINOXAMINE MALEATE SALT	406.86	3505-38-2	40
1412	DIGITOXIGENIN	374.52	143-62-4	40
1413	HEMICHOLINIUM-3	574.35	312-45-8	40
1414	Adipic acid	146.14	124-04-9	40
1415	17-BETA-ESTRADIOL 3,17-DIPROPIONATE	384.5202	113-38-2	40
1416	Cloperastine hydrochloride	366.33	14984-68-0	40
1417	Diphemanil mesylate	389.51	62-97-5	40
1418	Tetraethylenepentamine Pentahydrochloride	371.61	4961-41-5	40
1419	Theophylline-7-acetic acid	238.2	652-37-9	40
1420	Amprolium Hydrochloride	315.24	137-88-2	40
1421	Ziprasidone HCL	449.397	122883-93-6	40
1422	Uridine	244.2	58-96-8	40
1423	2-Aminobenzenesulfonamide	172.21	3306-62-5	40
1424	FLORFENICOL HCL	358.21	73231-34-2	40
1425	Kinetin	215.21	525-79-1	40
1426	DL-PENICILLAMINE	149.21	52-66-4	40
1427	Glafenine Hydrochloride	409.26	65513-72-6	40
1428	Tacrine HYDROCHLORIDE HYDRATE	234.72	206658-92-6	40
1429	4-Aminophenylarsonic acid	217.06	98-50-0	40
1430	Promethazine hydrochloride	320.88	58-33-3	40
1431	Warfarin sodium	330.31	129-06-6	40
1432	LITHOCHOLIC ACID	376.58	434-13-9	40
1433	4-HYDROXYANTIPYRINE	204.23	1672-63-5	40
1434	Nalidixic acid sodium salt	254.22	3374-05-8	40
1435	Linocaine hydrochloride	288.82	6108-05-0	40
1436	Econazole nitrate	444.7	24169-02-6	40
1437	Amiloride hydrochloride dihydrate	302.12	17440-83-4	40
1438	Dibucaine hydrochloride	379.92	61-12-1	40
1439	Losartan	422.91	114798-26-4	40
1440	Amoxicillin trihydrate	419.45	61336-70-7	40
1441	SIBUTRAMINE HYDROCHLORIDE MONOHYDRATE	334.33	125494-59-9	40
1442	6-Mercaptopurine monohydrate	170.19	6112-76-1	80
1443	Miconazole nitrate	479.15	22832-87-7	40
1444	Doxycycline	444.44	564-25-0	40
1445	Ampicillin	349.4	69-53-4	40
1446	Tetracycline	444.43	60-54-8	40
1447	Fipronil	437.15	120068-37-3	40
1448	SULFACHLOROPYRIDAZINE	284.72	80-32-0	40
1449	Luteolin	286.24	491-70-3	40
1450	Daidzein	254.24	486-66-8	40
1451	Actidione	281.35	66-81-9	40
1452	SANGUINARINE CHLORIDE	367.78	5578-73-4	10
1453	Raltegravir potassium	482.511	871038-72-1	20
1454	trans-Tranilast	327.331	70806-55-2	40
1455	Zolpidem	307.39	82626-48-0	40
1456	SGX-523	359.41	1022150-57-7	10
1457	SYR472	475.47	1029877-94-8	20
1458	BIBW2992 Afatinib	485.94	439081-18-2	20
1459	Isavuconazole	437.47	241479-67-4	20
1460	Icotinib	427.88	1204313-51-8	20
1461	Loxiglumide	461.38	107097-80-3	20
1462	MK3102	398.43	1226781-44-7	20
1463	Almotriptan Malate	469.55	181183-52-8	20
1464	LCZ696	915.98	936623-90-4	10
1465	Acotiamide HCl	541.06	773092-05-0	20
1466	Indacaterol	392.49	312753-06-3	40
1467	Fimasartan(BR-A-657)	501.65	247257-48-3	20
1468	Efonidipine(NZ-105)	631.66	111011-63-3	20
1469	Darunavir Ethanolate	593.73	635728-49-3	20
1470	Neratinib(HKI-272)	557.04	698387-09-6	5
1471	Tolvaptan	448.94	150683-30-0	40
1472	Radotinib	530.50	926037-48-1	10
1473	Dolutegravir (GSK1349572)	419.38	1051375-19-9	10
1474	Rilpivirine	366.42	500287-72-9	40
1475	SolithroMycin	845.01	760981-83-7	10
1476	Elvitegravir(GS-9137, JTK-303)	447.88	697761-98-1	20
1477	Efinaconazole	348.34	164650-44-6	40
1478	Avanafil	483.95	330784-47-9	20
1479	Ebastine	469.66	90729-43-4	20
1480	Menatetrenone	444.65	11032-49-8	40
1481	Edoxaban	738.27	1229194-11-9	10
1482	AP24534 Ponatinib	532.56	943319-70-8	20
1483	Parthenolide	348.32	29552-41-8	20
1484	Vemurafenib	489.92	918504-65-1	20
1485	LBH589（Panobinostat）	349.43	404950-80-7	40
1486	Pomalidomide	273.24	19171-19-8	40
1487	Ipragliflozin	404.45	761423-87-4	40
1488	Pirfenidone	185.22	53179-13-8	40
1489	Glycopyrrolate	398.33	596-51-0	40
1490	Dapagliflozin	408.87	461432-26-8	40
1491	Cevimeline hydrochloride hemihydrate	235.77	153504-70-2	40
1492	Camostat mesilate	494.52	59721-29-8	20
1493	Nafamostat mesylate	539.58	82956-11-4	20
1494	Efavirenz	315.68	154598-52-4	40
1495	Pixantrone dimaleate	557.21	144675-97-8	40
1496	Vortioxetine	298.45	508233-74-7	10
1497	Ramatroban	416.47	116649-85-5	40
1498	Tofacitinib (CP-690550) Citrate	504.49	540737-29-9	20
1499	Bortezomib	384.24	179324-69-7	20
1500	Candesartan Cilexetil	610.66	145040-37-5	20
1501	Tianeptine sodium salt	458.93	30123-17-2	20
1502	BROMFENAC SODIUM	356.15	120638-55-3	40
1503	TAK-438(Vonoprazan fumarate)	461.46	1260141-27-2	10
1504	Revaprazan Hydrochloride	398.9	178307-42-1	20
1505	AMG-073(Cinacalcet hydrochloride)	393.87	364782-34-3	40
1506	Tiagabine	375.55	115103-54-3	40
1507	GS-7340 Tenofovir alafenamide	476.47	379270-37-8	40
1508	Nedaplatin	303.18	95734-82-0	40
1509	Luliconazole	354.28	187164-19-8	40
1510	Tegafur (FT-207, NSC 148958)	200.17	17902-23-7	40
1511	Milbemycin oxime	1097.38	129496-10-2	10
1512	Pimobendan	334.37	74150-27-9	40
1513	Amfenac Sodium Monohydrate	295.27	61618-27-7	40
1514	Ferulic Acid	194.19	1135-24-6	40
1515	Entecavir	277.28	142217-69-4	40
1516	Pazopanib	437.52	444731-52-6	40
1517	Robenidine Hydrochloride	370.66	25875-50-7	40
1518	Succimer	182.22	304-55-2	40
1519	O-Acetyl-L-carnitine hydrochloride	239.7	5080-50-2	40
1520	Rufinamide	238.19	106308-44-5	20
1521	Tolmetin	257.28	26171-23-3	40
1522	Hesperetin	302.27	520-33-2	40
1523	Didanosine	236.23	69655-05-6	40
1524	Menadiol Diacetate	258.27	573-20-6	40
1525	Tauroursodeoxycholic Acid	499.70	14605-22-2	40
1526	Peramivir Trihydrate	382.45	1041434-82-5	40
1527	Retigabine	303.33	150812-12-7	40
1528	17-Methyltestosterone	302.45	58-18-4	40
1529	Dienogest	311.42	65928-58-7	40
1530	Levosimendan	280.28	141505-33-1	40
1531	Ecabet Sodium	402.48	86408-72-2	40
1532	Nandrolone decanoate	428.65	360-70-3	40
1533	Felypressin	1040.22	56-59-7	40
1534	Desloratadine	310.82	100643-71-8	20
1535	Alosetron Hydrochloride	330.81	122852-69-1	40
1536	Ulipristal acetate	475.62	126784-99-4	10
1537	Flupenthixol Dihydrochloride	507.44	51529-01-2	20
1538	Tirofiban hydrochloride monohydrate	495.07	150915-40-5	20
1539	Pimozide	461.55	2062-78-4	20
1540	Eflornithine Hydrochloride Monohydrate	236.64	96020-91-6	40
1541	Tapentadol Hydrochloride	257.8	175591-09-0	40
1542	Ropinirole Hydrochloride	296.84	91374-20-8	20
1543	Octreotide Acetate	1019.24	83150-76-9	40
1544	Fluoxymesterone	336.44	76-43-7	40
1545	Dalasetron Mesylate Hydrate	438.49	878143-33-0	40
1546	Etravirine	435.28	269055-15-4	20
1547	Etofibrate	363.79	31637-97-5	40
1548	Eprosartan Mesylate	520.62	144143-96-4	40
1549	Aclidinium bromide	564.55	320345-99-1	20
1550	Formoterol	344.40	73573-87-2	40
1551	Oxandrolone	306.44	53-39-4	40
1552	Misoprostol	382.53	59122-46-2	40
1553	Alizapride hydrochloride	351.83	59338-87-3	20
1554	Pitavastatin calcium	880.98	147526-32-7	20
1555	Nandrolone	274.4	434-22-0	40
1556	Diflorasone	410.45	2557-49-5	40
1557	Cilastatin	358.45	82009-34-5	40
1558	Guanethidine Monosulfate	296.39	645-43-2	40
1559	Ivabradine hydrochloride	505.05	148849-67-6	40
1560	Cabazitaxel	835.93	183133-96-2	40
1561	Alcaftadine	307.39	147084-10-4	40
1562	Bazedoxifene acetate	507.06	198481-33-3	20
1563	Allylestrenol	300.48	432-60-0	40
1564	Reboxetine	313.39	71620-89-8	40
1565	Lercanidipine	611.73	100427-26-7	10
1566	Latanoprost	432.59	130209-82-4	40
1567	Etonogestrel	324.46	54048-10-1	40
1568	Dexmedetomidine	200.28	113775-47-6	40
1569	Prucalopride	367.87	179474-81-8	40
1570	Cladribine	285.69	4291-63-8	40
1571	Lacosamide	250.29	175481-36-4	40
1572	Bimatoprost	415.57	155206-00-1	40
1573	Etofenamate	369.34	30544-47-9	40
1574	Droxidopa	213.19	23651-95-8	40
1575	Zanamivir	332.31	139110-80-8	40
1576	Ciclesonide(RPR251526)	540.69	126544-47-6	40
1577	Bedaquiline(TMC207; R207910)	555.50	843663-66-1	10
1578	Benactyzine Hydrochloride	363.88	57-37-4	40
1579	Levomilnacipran	246.34	96847-55-1	40
1580	Lumacaftor(VX 809)	452.41	936727-05-8	40
1581	Brivanib Alaninate (BMS-582664)	441.46	649735-63-7	20
1582	Mecamylamine hydrochloride	203.75	826-39-1	40
1583	Guanfacine Hydrochloride	282.55	29110-48-3	40
1584	Azelnidipine	582.65	123524-52-7	40
1585	Crizotinib	450.34	877399-52-5	20
1586	Doxorubicin hydrochloride	579.99	25316-40-9	40
1587	Asenapine Maleate	401.84	85650-56-2	40
1588	Teniposide	656.66	29767-20-2	40
1589	Apatinib	493.58	811803-05-1	20
1590	Cabozantinib, XL184	501.5	849217-68-1	40
1591	MK-4305 Suvorexant	450.92	1030377-33-3	40
1592	Ivacaftor (VX-770)	392.49	873054-44-5	20
1593	PeraMpanel	349.38	380917-97-5	40
1594	GDC-0449 Vismodegib	421.3	879085-55-9	20
1595	Veliparib (ABT-888)	244.29	912444-00-9	20
1596	Tipiracil hydrochloride	279.12	183204-72-0	40
1597	Eltrombopag	442.47	496775-61-2	40
1598	Fingolimod Hcl	343.93	162359-56-0	40
1599	Macitentan	588.27	441798-33-0	20
1600	Lomitapide Mesylate	789.83	202914-84-9	10
