# Supplementary material
Source: Research Square preprint supplement (doi:10.21203/rs.3.rs-8958728/v1)
Supplement: Supplementary file 5 [file f777317e44c02958b3ac0dc6.xlsx]

## Sheet: GI50
Table S3: Drug efficacy in 8 esophageal cell lines described by GI50 and AUC values.
	Drug
	Bortezomib	Carfilzomib	MLN-2238	Delanzomib	MG-132	Ixazomib citrate	Oprozomib	PI-1840	VR-23	Paclitaxel	Docetaxel	Cisplatin	Oxaliplatin	5-Fluorouracil	Anlotinib
GI50(nM)
ECA-109	8.141	7.048	72.78	30.07	189.7	34.46	86.72	NA	5090	83.75	4677	6075	93920	110800	7407
KYSE-30	2.496	2.75	24.22	6.244	28.49	7.549	18.4	NA	3386	NA	NA	3867	26610	77930	3966
KYSE-140	2.297	1.042	30.22	10.58	53.21	14.4	26.45	NA	1343	4.194	9.899	8384	109300	114000	7526
KYSE-520	3.441	3.288	39.94	11.9	38.45	21.25	23.41	NA	3854	70.06	467	10470.0	67310	182900	5349
KYSE-70	5.802	7.856	116.9	50.88	110.6000	63.86	188.9000	NA	4068	NA	NA	NA	3673	5797	3834
KYSE-150	98.04	48.31	3756	5965	1114	2200	3338	NA	3481	NA	NA	10620	52670	NA	11660
HEEC	9.281	7.243	115.6	58.83	331.3	64.21	257.9	NA	4663	NA	11.75	NA	112200	616300	5877
OE33	2.651	4.346	31.9900	9.1120	103.6	13.19	38.97	NA	3146	39.83	380.6	NA	4183	34800	6457
Note: NA denotes GI50 values that were removed for cases where values were not reached or higher than the tested drug dose range.
mean(ESCC)	20.0362	11.7157	673.343	1012.45	284.77	390.253	698.596	#DIV/0!	3537	52.668	1717.97	7236.5	58913.8	98285.4	6623.67
SD(ESCC)	38.2791	18.1172	1510.58	2426.3	468.144	886.814	1475.73	#DIV/0!	1235.62	42.5341	2572.77	2913.61	39921.8	64287.7	2941.52
mean(control)	5.966	5.7945	115.6	58.83	217.45	38.7	148.435	#DIV/0!	3904.5	39.83	196.175	#DIV/0!	58191.5	325550	6167
SD(control)	4.68812	2.04849	#DIV/0!	#DIV/0!	161.008	36.0766	154.807	#DIV/0!	1072.68	#DIV/0!	260.816	#DIV/0!	76379.6	411183	410.122

## Sheet: AUC
Table S3: Drug efficacy in 8 esophageal cell lines described by GI50 and AUC values.
	Drug
	Bortezomib	Carfilzomib	MLN-2238	Delanzomib	MG-132	Ixazomib citrate	Oprozomib	PI-1840	VR-23	Paclitaxel	Docetaxel	Cisplatin	Oxaliplatin	5-Fluorouracil	Anlotinib
AUC
ECA-109	288.3	294.1	200.7	230	175.6	232.5	196.5	16.88	40.79	208.1	180.8	168.2	118.5	111.1	196.7
KYSE-30	340.2	327.6	251.3	301.8	248	293.4	248.1	50.43	58.09	240.8	214.6	201.7	153.5	119.8	222.3
KYSE-140	339.4	325.3	246.1	282.1	223.1	275.2	238.1	26.99	93.3	244.5	221.9	171.4	107.4	101.6	199.9
KYSE-520	334.1	333.9	236	275.2	239.4	255.9	239.8	35.3	68.94	214.6	1927	115.8	125.5	97.36	212.7
KYSE-70	290.6	280.5	191.2	217.5	191.8	211.2	179.9	22.09	56.46	279	267.9	224.9	220.7	198.7	228.3
KYSE-150	200.1	218.5	82.82	92.02	105.4	104.1	91.85	33.07	70.9	64.56	61.09	153.6	133.6	63.59	185.9
HEEC	282.5	297.8	184.5	208.5	156.5	208	158.6	13.6	48.32	237.1	213.1	179.4	109.9	58.13	208.2
OE33	334.5	314.8	237.3	280.2	198.4	272.7	212.7	26.94	63.73	211	196.2	170	173.6	145.9	205.8
mean(ESCC)	298.783	296.65	201.353	233.103	197.217	228.717	199.042	30.7933	64.7467	208.593	478.882	172.6	143.2	115.358	207.633
SD(ESCC)	53.9029	43.683	63.0095	76.2229	52.8304	67.726	59.0871	11.7889	17.6502	74.9207	712.86	37.9213	41.011	45.1152	16.2455
mean(control)	308.5	306.3	210.9	244.35	177.45	240.35	185.65	20.27	56.025	224.05	204.65	174.7	141.75	102.015	207
SD(control)	36.7696	12.0208	37.3352	50.6996	29.6278	45.7498	38.2545	9.4328	10.8965	18.4555	11.9501	6.6468	45.0427	62.0628	1.69706
