# Supplementary material
Source: Research Square preprint supplement (doi:10.21203/rs.3.rs-8958728/v1)
Supplement: Supplementary file 6 [file f7a13fbce1ad9e75ceb94da6.xlsx]

## Sheet: Sheet1
Table S5: The patient information (age, gender) and pathological information (tumor site, differentiation level, tumor stage, the invasion status of nerve, vessel and outer membrane and tumor node metastasis (TNM) classifications) of ESCC tissue specimens.
Patient information			Pathological information
Patient id	Sex	Age	Location tumor organoids	Tumor organoids origin	Type tumor organoids	TNM	AJCC stage	Tumor differentiation level	Nerve invasion	Vessel invasion	Outer membrane invasion
P1	male	77	middle esophagus	Surgical resection	Squamous cell carcinoma	pT3N1M0	ⅢB	Moderately-well differentiated	Yes	Yes	Yes
P2	female	69	middle esophagus	Surgical resection	Squamous cell carcinoma	pT3N0M0	ⅡB	Poorly differentiated	Yes	No	Yes
P3	male	58	middle and lower esophagus	Biopsy	Squamous cell carcinoma	cT3N2M1	Ⅳ	Unknown	Unknown	Unknown	Unknown
Note: *All the patients were therapy-naïve. Abbreviations: AJCC, American Joint Committee on Cancer.
